# Supplementary material for: Regorafenib enhances antitumor immunity via inhibition of p38 kinase/Creb1/Klf4 axis in tumor-associated macrophages
Source: J Immunother Cancer. 2021 Mar 22;9(3):e001657. doi: 10.1136/jitc-2020-001657 (PMC7986673; doi:10.1136/jitc-2020-001657)
Supplement: Supplementary data [file jitc-2020-001657supp001.xlsx]

## Sheet: Table S1
Table S1 curated genesets used in this study
IL6_signature_26893580	M1/M2_PMID:26699615	M2/M1_PMID:26699615
Akr1c21	Cd38	Ptgs1
C3	Cfb	Egr2
Cebpd	Slfn4	Olfm1
Cfb	H2-Q6	Flrt2
Gbp2	Fpr1	P2ry1
Ifitm1	Slfn1	Vwf
Ifitm2	Gpr18	Bcar3
Ifitm3	Ccrl2	Il6st
Lcn2	Fpr2	Tanc2
S100a8	Cxcl10	Mmp12
S100a9	Gbp6	Tcfec
Serpina3n	Oasl1	Clec7a
Serpina3c	Tlr2	Matk
Serpina3m	Ms4a4c	Myc
Serpina3k	Gm13012	Clec10a
Tmc5	Irak3	Amz1
Tubb3	Hp	Tmem158
	Itgal	Tiam1
	Herc6	Rhoj
	Cd300lf	Mmp9
	Isf20	Mrc1
	Pstpip2	Atp6v0a1
	Cp	Lmna
	Isg15	Chst7
	Ifi44	Atp6v0d
	Saa3	Emp2
	Ifit1	Cd300ld
	Marco	Cd83
	F11r	Socs6
	Rsad2	Plk2
	Ddx60	Ptpla
	Pilr1
	Cpd
	Fam26f
	Aoah
	Gngt2
	Mx1
	Pyhin1
	Slfn8
	Arhgap24
	Nfkbiz
	Stat1
	Zpb1
	Ddx58
	Tuba4a
	H2-T10
	Ebi3
	Fam176b
	Xaf1
	Stat2
	Sepx1
	Ifit2

## Sheet: Table S2
Table S2 GSEA of regorafenib (related to Figure 1C)
ID	geneset size	Regorafenib 5mg vs. Vehicle
		enrichmentScore (ES)	normalized ES	p-value	core_enrichment
GO_SPROUTING_ANGIOGENESIS	106	-0.528274	-2.2526	0.000194326	Reck/Smad1/Ppp1r16b/Jak1/Grem1/Kdr/Slit2/Akt3/Egr3/Ghrl/Fgfbp1/Dll1/Cdh13/Flt4/Nr4a1/Thbs1/Creb3l1/Hmox1/Tmem2/Srpx2/Stard13/Klf4/Robo1/Ptgs2/Rhoj/Pkm/Itga5/Mmrn2/Nrarp/Esm1/Flt1/Pgf/Foxc2/Vegfa/Bmper/Dll4
GO_BLOOD_VESSEL_ENDOTHELIAL_CELL_MIGRATION	105	-0.440563	-1.87388	0.000195427	Prkca/Sp1/Hif1a/Angpt4/Emp2/Nus1/Sirt1/Fgfr1/Grem1/Kdr/Slit2/Akt3/Egr3/Vash1/Sox18/Fgfbp1/Alox12/Plcg1/Nr4a1/Thbs1/Hmox1/Srpx2/Rgcc/Jup/Ets1/Id1/Amotl1/Stard13/Klf4/Robo1/Ptgs2/Rhoj/Angpt2/Mmrn2/Nos3/Tgfb1/Foxc2/Vegfa/Dll4
LU_TUMOR_ANGIOGENESIS_UP	25	-0.496729	-1.56396	0.0325682	Ezh2/Jag2/Edn1/Fgfr1/Spp1/Jag1/Pdgfa/Tnfaip6/Stc1/Hey1/Vegfa
HU_ANGIOGENESIS_DN	35	-0.43426	-1.47775	0.04329	Pds5a/Ndufb6/Set/Vapa/Ptp4a2/Mcm6/Dars/Psmb1/Plxna2/Atp6v1g1/Gmps/Gpi1/Polr2k/Lonp1/Eif3m/Gnai1/Anxa7
GO_LYMPHOCYTE_MEDIATED_IMMUNITY	207	0.522311	2.45633	0.000203998	Cd40/Prf1/Il12b/Cd160/Icam1/Cd96/Hfe/C7/Ptpn6/C1qa/Il18/Pou2f2/H2-K1/Gm7030/Was/Fcer1g /Crtam/Dusp22/Slamf7/C1qb/Xcl1/Batf/Ccr2/Ceacam2/Nlrp3/Cd81/Bcl3/H2-Ab1/Cd74/Klrd1/ Tnfrsf1b/C1qc/Fcgr2b/Btk/B2m/Fzd5/Cd226/Stat5b/Tnf/H2-Q4/H2-D1/Ctsh/Hprt/Slc11a1/Vav1/ Rftn1/Tlr8/ Sash3/Gzmm/Irf7/Il4ra/Ung/ Il18r1/ Foxj1/Cd8a/Arrb2/Slamf6/Ctsc/Inpp5d/Il12a/Ncr1/Lamp1/Gata3/Parp3/Coro1a/H2-M3/Gm10499 /Rsad2
GO_ANTIGEN_PROCESSING_AND_PRESENTATION	208	0.44537	2.09466	0.000204374	Fcgr1/H2-DMb2/H2-Ob/Icam1/Tapbpl/Hfe /Ctse/H2-DMa/Ctsf/Psme2/Clec4a2/H2-K1/ Gm7030/Was/Fcer1g/Psmb10/Tapbp/Ctss/Psmb8/H2-Ab1/Pycard/Cd74/H2-Aa/Fcgr2b/H2-Ea-ps/Psmb9/Ncf1/March1/B2m/H2-Q4/H2-Eb1/H2-D1/Erap1/Ctsh/Psme1/Nod2/Slc11a1/H2-DMb1/ Cybb/Vamp8/Rftn1/Ncf4/Cd8a/Tap2/Rab4a/Dnm2/Trem2/Psmb6/Atg5/Ncf2/H2-M3/Gm10499/ Tap1/Rab5b/Cd68/Psmb2/Cyba/Lgmn/Ccr7
GO_T_CELL_ACTIVATION	390	0.440319	2.22463	0.000201776	Ccl12/Il12b/Cd160/Itk/H2-DMb2/Lcp1/Icam1/ Cd3g/Vcam1/Eomes/Rhoh/Hfe/Cd5/Ptpn6/Dock8/Cd3e/Aif1/Tnfrsf18/Cd8b1/Il18/Tnfsf14/Tgfbr2/Clec4a2/Ccl5/Icos/Lax1/Pnp/Irf4/Nfatc2/Zap70/Was/Fcer1g/Dusp22/Sirpa/Psmb10/Xcl1/Cd7/Mapk8ip1/Batf/Tigit/Cd83/Ptger4/Ccr2/Ceacam2/Nlrp3/Dock2/Bcl3/Prkcq/Pycard/Ebi3/Cd74/Rac2/Pla2g2d/Tnfrsf1b/Gpr18/Treml2/Loxl3/Cd3d/Fcgr2b/Cd6/Sit1/Clec7a/B2m/Fzd5/Stat5b/Pik3cg/Bad/Gpr1…
GO_MACROPHAGE_ACTIVATION	72	0.525714	2.09261	0.000616776	Myo18a/C5ar1/Aif1/C1qa/Tlr3/Tlr2/Tlr1/Jun/Fpr2/Cebpa/Cd74/Fcgr2b/Itgam/Tnf/Slc11a1/Tlr8/Itgb2/App/Il4ra/Tyrobp/Ticam1/Prkce/Tlr7/Trem2/Grn/Pla2g5/Stap1

## Sheet: Table S3
Table S3 Transcriptomic analysis of regorafenib- and DC101-treated tumor in orthotopic HCC model (related to Figure 2B)
GeneID	GeneName	Regorafenib vs. Vehicle			DC101 vs. Vehicle
		logFC	p-value	adj. p-value	logFC	p-value	adj. p-value
ENSMUSG00000072437.3	Nanos1	1.48135	5.92604e-05	0.0788887	0.394208	0.130396	0.60383
ENSMUSG00000039646.5	Vasn	-0.840943	6.5245e-05	0.0788887	-0.178971	0.177261	0.645452
ENSMUSG00000027611.12	Procr	1.18942	6.91952e-05	0.0788887	-0.0869207	0.673351	0.903188
ENSMUSG00000006930.15	Hap1	1.09146	7.38767e-05	0.0788887	0.234414	0.217041	0.675983
ENSMUSG00000089774.2	Slc5a3	1.72485	9.76162e-05	0.0906311	0.115501	0.711045	0.915438
ENSMUSG00000097252.1	Gm6634	1.42321	0.000140266	0.0906311	0.386398	0.162007	0.63395
ENSMUSG00000028613.14	Lrp8	0.9432	0.000148292	0.0906311	0.0953707	0.576675	0.862526
ENSMUSG00000034135.15	Sik3	0.586293	0.000165548	0.0906311	0.0768664	0.457705	0.809271
ENSMUSG00000031029.6	Eif3f	-0.613624	0.00016587	0.0906311	-0.204047	0.0754486	0.537214
ENSMUSG00000052485.7	Tmem171	1.474	0.000168548	0.0906311	0.24572	0.392526	0.779441
ENSMUSG00000002104.11	Rapsn	1.69695	0.000176255	0.0906311	0.43354	0.20556	0.66685
ENSMUSG00000041617.10	Ccdc74a	-1.24417	0.000179277	0.0906311	-0.341039	0.10025	0.573748
ENSMUSG00000053332.13	Gas5	-0.601219	0.000198256	0.0906311	-0.118999	0.275021	0.712219
ENSMUSG00000086841.1	2410006H16Rik	-1.07562	0.00022087	0.0914537	-0.276799	0.164614	0.636404
ENSMUSG00000085794.5	Vax2os	-2.88242	0.000243603	0.0937386	-0.0753362	0.862034	0.962223
ENSMUSG00000111503.1	Gm47034	-1.72892	0.000254407	0.0937386	-0.0159916	0.948892	0.988738
ENSMUSG00000035064.17	Eef2k	-0.644517	0.000259674	0.0937386	-0.194474	0.10763	0.58574
ENSMUSG00000037185.9	Krt80	1.30763	0.000269049	0.0937386	0.251769	0.334275	0.741325
ENSMUSG00000015533.9	Itga2	1.67358	0.000271901	0.0937386	0.363696	0.290252	0.717199
ENSMUSG00000020623.11	Map2k6	0.943921	0.00027259	0.0937386	0.314983	0.109637	0.589098
ENSMUSG00000001774.8	Chordc1	0.861644	0.000284489	0.0950407	0.217209	0.199131	0.66127
ENSMUSG00000089812.2	Gm15867	-1.5318	0.00029043	0.0950407	-0.373617	0.14878	0.621495
ENSMUSG00000027488.12	Snta1	-0.878378	0.000317684	0.100213	-0.234902	0.145819	0.618937
ENSMUSG00000030835.6	Nomo1	0.597144	0.000321055	0.100213	0.0155605	0.890208	0.970495
ENSMUSG00000029659.16	Medag	-1.74166	0.000332573	0.10071	-0.502758	0.107884	0.586196
ENSMUSG00000025464.15	Paox	-1.0726	0.000365846	0.104544	-0.267731	0.167735	0.639591
ENSMUSG00000059108.4	Ifitm6	1.70444	0.00038528	0.105634	0.0943292	0.802587	0.946047
ENSMUSG00000049792.6	Bag5	-0.694499	0.000407701	0.106721	-0.17631	0.187361	0.651871
ENSMUSG00000002565.16	Scin	2.33787	0.000433632	0.106721	-0.505467	0.3982	0.782096
ENSMUSG00000030142.10	Clec4e	1.74702	0.000439894	0.106721	0.565829	0.153113	0.626564
ENSMUSG00000111118.1	Gm6545	3.45204	0.000465758	0.108644	0.210726	0.806575	0.947081
ENSMUSG00000078429.9	Ctdsp2	-0.733566	0.000470079	0.108644	-0.18909	0.210908	0.670706
ENSMUSG00000105867.2	Gm42517	1.52988	0.000492576	0.10999	0.174081	0.614178	0.879584
ENSMUSG00000025757.12	Hspa4l	1.00381	0.000493326	0.10999	0.177475	0.386291	0.775537
ENSMUSG00000026278.14	Bok	-1.25774	0.000512837	0.111116	-0.419534	0.105639	0.582422
ENSMUSG00000042182.16	Bend6	1.12615	0.000524447	0.111116	0.395966	0.123192	0.598985
ENSMUSG00000025324.8	Atp10a	0.959372	0.000525297	0.111116	0.0366173	0.858869	0.961271
ENSMUSG00000040189.17	Ccdc114	1.36046	0.000563473	0.112643	0.407403	0.192855	0.656019
ENSMUSG00000025492.6	Ifitm3	1.01149	0.000563513	0.112643	0.393827	0.0768795	0.540278
ENSMUSG00000032420.8	Nt5e	1.17024	0.000577399	0.112643	0.380363	0.147299	0.621033
ENSMUSG00000028161.17	Ppp3ca	-0.816789	0.000599485	0.114745	-0.337781	0.0643778	0.521431
ENSMUSG00000021270.13	Hsp90aa1	0.960922	0.000630626	0.115702	0.225174	0.268375	0.706712
ENSMUSG00000041420.18	Meis3	-0.879435	0.000640188	0.115702	-0.276552	0.12197	0.596733
ENSMUSG00000017697.3	Ada	-1.23146	0.000644415	0.115702	-0.417861	0.0904412	0.562608
ENSMUSG00000041923.15	Nol4	1.52024	0.000682406	0.115702	0.337804	0.348882	0.749165
ENSMUSG00000001018.15	Snapin	-0.764698	0.000683319	0.115702	-0.135313	0.385867	0.775264
ENSMUSG00000039741.15	Bahcc1	-0.774464	0.000693312	0.115702	-0.194263	0.227436	0.682141
ENSMUSG00000024966.8	Stip1	0.976814	0.000707133	0.115702	0.405592	0.0696908	0.528173
ENSMUSG00000058809.8	Hspd1-ps3	0.693564	0.000759495	0.117948	0.236949	0.141814	0.61362
ENSMUSG00000031169.13	Porcn	-1.24833	0.000773552	0.117948	-0.507393	0.0561666	0.509554
ENSMUSG00000029070.9	Mxra8	-1.28357	0.000816868	0.117948	-0.127249	0.640421	0.891389
ENSMUSG00000020883.18	Fbxl20	-0.767908	0.000819175	0.117948	-0.255317	0.132286	0.605106
ENSMUSG00000027075.16	Slc43a1	-1.37686	0.000850991	0.118222	-0.373552	0.173834	0.643245
ENSMUSG00000046324.12	Ermp1	0.702763	0.000856554	0.118222	0.326684	0.0537745	0.504991
ENSMUSG00000003849.8	Nqo1	-1.0626	0.000878689	0.120458	-0.123374	0.571679	0.860879
ENSMUSG00000041605.16	Inava	-0.951226	0.000890061	0.120484	-0.320473	0.1278	0.602028
ENSMUSG00000024401.14	Tnf	1.91279	0.000909725	0.120484	0.448219	0.34883	0.749165
ENSMUSG00000029022.18	Miip	-0.629389	0.000913832	0.120484	-0.199122	0.147731	0.621033
ENSMUSG00000039680.10	Mrps6	0.982485	0.000930314	0.120484	0.466974	0.0574134	0.511352
ENSMUSG00000043740.15	B430306N03Rik	1.43098	0.000931114	0.120484	0.525089	0.142011	0.613805
ENSMUSG00000037624.15	Kcnk2	1.87911	0.000940435	0.120484	0.277559	0.557065	0.854486
ENSMUSG00000032691.14	Nlrp3	1.53162	0.000944206	0.120484	0.365813	0.327787	0.737475
ENSMUSG00000022759.15	Lrrc74b	-2.34635	0.000985915	0.121238	-0.309813	0.511619	0.834692
ENSMUSG00000047264.8	Zfp358	-0.60235	0.000985967	0.121238	-0.19951	0.138302	0.609212
ENSMUSG00000062012.14	Zfp13	-0.654547	0.00105518	0.126678	-0.285316	0.0607249	0.518631
ENSMUSG00000034994.10	Eef2	-0.716855	0.00106664	0.127301	-0.308214	0.0774144	0.541114
ENSMUSG00000028874.14	Fgr	1.43833	0.00111051	0.128076	0.566197	0.123486	0.598985
ENSMUSG00000086742.8	Gm16201	1.78072	0.00115387	0.128076	0.386256	0.397241	0.78149
ENSMUSG00000003420.8	Fcgrt	-0.694622	0.00115818	0.128076	0.167592	0.286626	0.715176
ENSMUSG00000061080.11	Lsamp	-2.71667	0.00118654	0.128736	-0.501889	0.337256	0.742748
ENSMUSG00000006611.15	Hfe	-0.659402	0.0012149	0.129135	0.124153	0.374928	0.766966
ENSMUSG00000092203.7	1110038B12Rik	-0.767409	0.00121878	0.129135	-0.0193456	0.910438	0.97693
ENSMUSG00000047497.10	Adamts12	-1.30289	0.00122805	0.129135	-0.519912	0.0922828	0.564422
ENSMUSG00000030352.14	Tspan9	0.735703	0.00129098	0.130088	-0.0126317	0.940242	0.9871
ENSMUSG00000068631.8	Gm7676	0.959808	0.00130158	0.130088	0.226645	0.3456	0.746663
ENSMUSG00000072692.7	Rpl37rt	-0.619832	0.00134441	0.13049	-0.155922	0.281491	0.713362
ENSMUSG00000046808.17	Atp10d	0.63527	0.00134658	0.13049	0.132319	0.393452	0.779555
ENSMUSG00000072214.7	Sept5	-0.748741	0.00134929	0.13049	-0.178345	0.278397	0.712992
ENSMUSG00000024556.3	Me2	0.643902	0.00135683	0.13049	0.101104	0.507083	0.832533
ENSMUSG00000021699.17	Pde4d	-0.759535	0.00135706	0.13049	-0.327665	0.0692995	0.528173
ENSMUSG00000038178.16	Slc43a2	-1.04779	0.00143704	0.131218	-0.124604	0.601615	0.874055
ENSMUSG00000023067.14	Cdkn1a	0.996676	0.00143801	0.131218	0.0518674	0.822719	0.951051
ENSMUSG00000026213.15	Stk11ip	-0.68391	0.00143912	0.131218	-0.151659	0.325447	0.736051
ENSMUSG00000029343.17	Crybb1	-2.3971	0.00144408	0.131218	0.0758939	0.867362	0.962528
ENSMUSG00000072769.6	Gm10419	1.62358	0.00145392	0.131218	0.212956	0.621069	0.883218
ENSMUSG00000060862.10	Zbtb40	0.906933	0.0015319	0.132756	0.406051	0.0897398	0.562165
ENSMUSG00000039208.15	Metrnl	0.870719	0.00153204	0.132756	0.0523651	0.807461	0.947382
ENSMUSG00000038777.19	Sema6c	-1.43758	0.00155608	0.133524	-0.385702	0.209679	0.669948
ENSMUSG00000054855.13	Rnd1	0.906049	0.001623	0.134576	0.447295	0.0671438	0.524895
ENSMUSG00000040997.13	Abhd4	-0.630698	0.00174673	0.139525	0.0111334	0.939146	0.9871
ENSMUSG00000017724.14	Etv4	1.16192	0.00175704	0.139798	-0.199935	0.525171	0.839942
ENSMUSG00000054237.5	Fra10ac1	-0.615855	0.00177023	0.140298	-0.0406344	0.767701	0.93483
ENSMUSG00000055799.13	Tcf7l1	-1.62893	0.00178593	0.140991	-0.121003	0.707563	0.913884
ENSMUSG00000029640.17	Usp12	0.591391	0.00183233	0.14115	-0.0574106	0.692289	0.909239
ENSMUSG00000003534.17	Ddr1	-0.746044	0.00187556	0.14115	-0.378184	0.0516487	0.50474
ENSMUSG00000073968.4	Trim68	-0.623251	0.00188023	0.14115	-0.0470085	0.737338	0.924294
ENSMUSG00000026409.14	Pfkfb2	-0.683621	0.00189262	0.14115	-0.263951	0.11511	0.591807
ENSMUSG00000022306.9	Zfpm2	0.658626	0.00190808	0.14115	-0.249036	0.164512	0.636376
ENSMUSG00000113515.1	Gm29675	-2.41362	0.00199767	0.144096	-0.328774	0.474426	0.817134
ENSMUSG00000025185.14	Loxl4	1.05517	0.00201504	0.144096	0.547129	0.0614896	0.518631
ENSMUSG00000051007.15	Gatd1	-0.612432	0.00206835	0.146056	0.0575626	0.688983	0.907536
ENSMUSG00000060730.8	Gm10086	-0.740484	0.00209825	0.146056	-0.370743	0.0537221	0.504991
ENSMUSG00000046272.4	Olfr1444	-2.0949	0.0021205	0.146056	-0.31302	0.518855	0.837991
ENSMUSG00000040540.6	Gm9770	-0.71408	0.00215422	0.146056	-0.241612	0.165593	0.637759
ENSMUSG00000036968.15	Cnpy4	0.631069	0.00217941	0.146056	0.28161	0.100691	0.57443
ENSMUSG00000022537.18	Tmem44	-1.18809	0.00219563	0.146056	-0.279738	0.299439	0.721276
ENSMUSG00000041895.15	Wipi1	-0.790795	0.00220298	0.146066	-0.204826	0.291574	0.717577
ENSMUSG00000022876.18	Samsn1	1.22859	0.00228501	0.146942	0.479943	0.162127	0.63395
ENSMUSG00000030600.15	Lrfn1	-1.00178	0.00229973	0.146942	-0.320463	0.181218	0.649267
ENSMUSG00000026479.13	Lamc2	0.969575	0.00231895	0.147029	0.381756	0.155121	0.628503
ENSMUSG00000021591.8	Glrx	0.941978	0.00233612	0.147107	0.314898	0.215804	0.674416
ENSMUSG00000028799.15	Zfp362	-0.615896	0.0023848	0.148706	-0.138722	0.352884	0.751638
ENSMUSG00000045326.13	Fndc7	1.06718	0.00242071	0.148829	0.580926	0.0593327	0.515767
ENSMUSG00000013974.3	Mcemp1	2.11611	0.00247582	0.1495	-0.376221	0.574111	0.861948
ENSMUSG00000022620.14	Arsa	0.599678	0.00252426	0.150632	0.284172	0.0854165	0.556802
ENSMUSG00000086331.1	Gm16310	1.87661	0.00258647	0.151328	0.229456	0.679633	0.904702
ENSMUSG00000020484.18	Xbp1	0.81258	0.00262269	0.151328	0.435967	0.0567021	0.510396
ENSMUSG00000096981.2	Gm16845	-1.21755	0.0026518	0.151328	-0.369453	0.204008	0.666406
ENSMUSG00000003575.13	Crtc1	-0.761972	0.00268514	0.151328	-0.3713	0.070924	0.529635
ENSMUSG00000032370.8	Lactb	-0.660764	0.00272025	0.151346	0.0405954	0.793734	0.943911
ENSMUSG00000039686.14	Zer1	-0.696322	0.00272272	0.151346	-0.199199	0.256482	0.69892
ENSMUSG00000062611.4	Rps3a2	-0.687865	0.00278492	0.153719	-0.275282	0.123831	0.599334
ENSMUSG00000030096.8	Slc6a6	-1.02277	0.0028012	0.153719	-0.433356	0.122796	0.598609
ENSMUSG00000097587.2	4930578M01Rik	1.71076	0.00283062	0.154531	-0.0404263	0.936714	0.986454
ENSMUSG00000025427.14	Rnf165	1.44764	0.00292026	0.155885	0.452515	0.284755	0.71485
ENSMUSG00000035539.13	Ccdc180	1.58708	0.00297132	0.155885	0.218491	0.642708	0.892207
ENSMUSG00000027864.9	Ptgfrn	-0.877884	0.0029791	0.155885	-0.199655	0.39066	0.77806
ENSMUSG00000099465.1	Gm3830	1.83719	0.0029873	0.155885	0.344064	0.529239	0.841461
ENSMUSG00000029657.15	Hsph1	1.8252	0.00300558	0.155885	0.220706	0.64416	0.89261
ENSMUSG00000025154.14	Arhgap19	-0.82419	0.00301266	0.155885	-0.228752	0.264376	0.704408
ENSMUSG00000070942.8	Il1rl2	-0.906227	0.00305256	0.155885	-0.3554	0.128832	0.603205
ENSMUSG00000098104.1	Gm6085	-0.643924	0.00308851	0.155885	-0.0341804	0.825935	0.952071
ENSMUSG00000020288.13	Ahsa2	0.830386	0.00309682	0.155885	0.196797	0.387734	0.776502
ENSMUSG00000031290.14	Lrch2	-0.697008	0.00317598	0.156798	-0.379208	0.0552117	0.50811
ENSMUSG00000083899.2	Gm12346	0.821843	0.00318403	0.156798	0.192064	0.408603	0.787363
ENSMUSG00000000308.14	Ckmt1	1.22467	0.00320766	0.157198	0.367759	0.302251	0.723243
ENSMUSG00000060131.11	Atp8b4	0.877679	0.00324894	0.158456	-0.136998	0.594399	0.870489
ENSMUSG00000086629.8	2810403D21Rik	-1.41291	0.0032719	0.159193	-0.090268	0.775787	0.938015
ENSMUSG00000055691.5	Gja6	-2.31495	0.00333928	0.160546	-0.152297	0.781117	0.939395
ENSMUSG00000031584.16	Gsr	-1.08205	0.00336713	0.160748	-0.4817	0.11493	0.591807
ENSMUSG00000005949.9	Ctns	-0.699772	0.00347311	0.162689	-0.271574	0.147757	0.621033
ENSMUSG00000006445.3	Epha2	0.882146	0.00350558	0.162689	0.255905	0.29479	0.718523
ENSMUSG00000074001.3	Klhl40	-1.42638	0.00353508	0.162689	-0.302447	0.36733	0.762006
ENSMUSG00000027068.6	Dhrs9	1.50794	0.0035351	0.162689	0.582863	0.200648	0.66356
ENSMUSG00000039236.18	Isg20	0.98544	0.00356241	0.162689	0.361673	0.211501	0.671089
ENSMUSG00000001128.7	Cfp	1.06884	0.00356546	0.162689	0.361769	0.232979	0.684556
ENSMUSG00000037235.13	Mxd4	-0.718122	0.0035976	0.162689	0.0179324	0.92353	0.981535
ENSMUSG00000028101.18	Pias3	-0.651794	0.00361664	0.162689	-0.373541	0.0501991	0.501226
ENSMUSG00000044937.15	Ttc41	1.3067	0.00362439	0.162689	0.46457	0.234424	0.686026
ENSMUSG00000021822.3	Plau	1.02629	0.00365026	0.162921	-0.108255	0.694819	0.909755
ENSMUSG00000035678.8	Tnfsf9	1.12338	0.0036768	0.162921	-0.208721	0.54683	0.849371
ENSMUSG00000063851.12	Rnf183	2.22587	0.00369662	0.163269	0.161986	0.821043	0.950878
ENSMUSG00000082896.1	Gm5844	0.840629	0.0037017	0.163269	0.178642	0.462706	0.811516
ENSMUSG00000025921.7	Rdh10	-1.00552	0.00375624	0.16384	0.0395571	0.8776	0.966282
ENSMUSG00000079414.3	Gm11110	0.702507	0.00377169	0.16384	0.0225764	0.910942	0.97693
ENSMUSG00000079575.3	Rbpj-ps3	0.627092	0.00379193	0.16384	0.0309227	0.862473	0.962223
ENSMUSG00000056215.13	Lrguk	-1.25668	0.00379436	0.16384	-0.473273	0.143826	0.61661
ENSMUSG00000001768.16	Rin2	-0.810035	0.00379549	0.16384	0.0625864	0.775075	0.937771
ENSMUSG00000029915.14	Clec5a	1.31272	0.00379712	0.16384	0.493631	0.205623	0.66685
ENSMUSG00000009828.15	Ick	-0.61434	0.0038011	0.16384	0.0719446	0.642053	0.891978
ENSMUSG00000013076.17	Amotl1	-0.707217	0.00381104	0.16384	-0.369554	0.0755442	0.537438
ENSMUSG00000038372.14	Gmds	0.636591	0.00381118	0.16384	0.369648	0.0572933	0.511065
ENSMUSG00000026649.14	Cfap126	-1.1439	0.00385519	0.164015	-0.105053	0.698862	0.910537
ENSMUSG00000066861.14	Oas1g	1.46331	0.0038597	0.164015	0.510486	0.252348	0.696081
ENSMUSG00000096740.8	Lbhd1	0.854136	0.00386611	0.164015	0.337911	0.182793	0.650122
ENSMUSG00000038451.13	Spsb2	-0.653833	0.00387431	0.164015	-0.0121595	0.941066	0.9871
ENSMUSG00000062152.4	Rpl21-ps14	-2.32355	0.00396901	0.165328	-0.120493	0.831258	0.954135
ENSMUSG00000092572.7	Serpinb10	1.83336	0.0039958	0.165328	0.554747	0.326788	0.736848
ENSMUSG00000052632.16	Asap2	0.675411	0.00405709	0.165328	0.0841439	0.665067	0.900004
ENSMUSG00000025912.16	Mybl1	0.809792	0.00408082	0.165328	0.369725	0.128394	0.60304
ENSMUSG00000064247.14	Plcxd1	2.15671	0.00408818	0.165328	0.384864	0.573604	0.86157
ENSMUSG00000036622.15	Atp13a2	-0.663849	0.00410216	0.165328	-0.140887	0.434249	0.798395
ENSMUSG00000038481.13	Cdk19	-0.630862	0.00411327	0.165328	-0.0931085	0.580796	0.863849
ENSMUSG00000083396.1	Gm15542	0.909152	0.00413578	0.165328	0.28007	0.301175	0.722457
ENSMUSG00000020101.14	Vsir	-0.69699	0.00414089	0.165328	-0.0755304	0.690994	0.908688
ENSMUSG00000040093.15	Bmf	-1.13957	0.00415186	0.165328	-0.243104	0.424284	0.794631
ENSMUSG00000001542.7	Ell2	0.984193	0.00417015	0.165328	0.421718	0.149021	0.621822
ENSMUSG00000082575.1	Gm13050	-0.681049	0.00423941	0.165328	-0.318072	0.106631	0.584963
ENSMUSG00000037306.13	Man1c1	-0.625573	0.00424241	0.165328	-0.255696	0.145239	0.618535
ENSMUSG00000031930.11	Wwp2	-0.765998	0.00434127	0.165876	-0.153432	0.473847	0.817134
ENSMUSG00000017466.9	Timp2	-1.12221	0.00435301	0.166012	-0.289472	0.362866	0.759772
ENSMUSG00000079511.8	Gm42688	-0.704753	0.00443899	0.167714	-0.160793	0.38717	0.776215
ENSMUSG00000024248.13	Cox7a2l	-0.609122	0.00447791	0.168557	-0.0374625	0.821327	0.95092
ENSMUSG00000038797.13	Zscan2	-0.81797	0.00450803	0.168752	-0.195619	0.362748	0.759681
ENSMUSG00000073489.6	Ifi204	0.817531	0.0045609	0.169368	0.0447651	0.849185	0.959168
ENSMUSG00000022159.16	Rab2b	-0.610601	0.00461283	0.169368	-0.0920414	0.566655	0.859144
ENSMUSG00000037214.12	Thap1	0.646186	0.00461578	0.169368	0.0922521	0.629084	0.887526
ENSMUSG00000027230.9	Creb3l1	-0.789123	0.00468555	0.169368	-0.139488	0.522532	0.838939
ENSMUSG00000101191.6	Gm28809	1.26633	0.00472337	0.169368	0.155618	0.692741	0.909239
ENSMUSG00000030022.14	Adamts9	0.688576	0.0047706	0.169368	0.103985	0.599265	0.872767
ENSMUSG00000020034.7	Tcp11l2	-1.15241	0.00480091	0.169368	-0.206337	0.482758	0.821495
ENSMUSG00000096960.1	A230028O05Rik	1.13878	0.00482472	0.169368	0.54071	0.13249	0.605106
ENSMUSG00000026203.16	Dnajb2	0.887025	0.00482908	0.169368	0.505995	0.0687878	0.528122
ENSMUSG00000027750.16	Postn	-1.75782	0.00485821	0.169368	-0.574423	0.262958	0.70344
ENSMUSG00000074457.10	S100a16	-1.00795	0.00497867	0.170477	-0.511086	0.0833807	0.555618
ENSMUSG00000026535.9	Ifi202b	0.754205	0.00498265	0.170477	0.272654	0.222511	0.679208
ENSMUSG00000048058.17	Ldlrad3	-1.0199	0.00500064	0.170805	-0.288771	0.288005	0.715627
ENSMUSG00000061878.15	Sphk1	-1.02679	0.00502887	0.170906	-0.188355	0.507745	0.832923
ENSMUSG00000105981.1	2810428J06Rik	2.39499	0.00509906	0.172425	0.325595	0.681976	0.905242
ENSMUSG00000071456.6	1110002L01Rik	0.624053	0.00513293	0.172669	0.160024	0.395963	0.78088
ENSMUSG00000051335.6	Gfod1	0.666382	0.00516794	0.172844	-0.245472	0.233301	0.684715
ENSMUSG00000052684.4	Jun	0.823492	0.00517192	0.172844	0.249161	0.302373	0.723273
ENSMUSG00000034394.14	Lif	1.38015	0.00526867	0.174438	0.396	0.344445	0.745911
ENSMUSG00000036006.19	Ripor2	1.27426	0.00530476	0.174438	0.398273	0.322971	0.735255
ENSMUSG00000060487.7	Samd5	-1.61349	0.00533633	0.174447	0.270895	0.463665	0.811687
ENSMUSG00000048200.12	Cracr2b	-0.766382	0.00536205	0.174447	-0.201593	0.335628	0.741733
ENSMUSG00000022389.15	Tef	-0.690755	0.00540734	0.174975	0.0182422	0.92259	0.981049
ENSMUSG00000032666.16	1700025G04Rik	0.606533	0.00543981	0.175746	0.115624	0.523766	0.83939
ENSMUSG00000033644.5	Piwil2	1.22124	0.00552873	0.176928	0.526159	0.178658	0.646698
ENSMUSG00000022421.19	Nptxr	0.659431	0.00560546	0.17798	0.148599	0.44858	0.805135
ENSMUSG00000084915.2	C230037L18Rik	1.27518	0.00564562	0.178975	0.197762	0.629574	0.887572
ENSMUSG00000073902.5	Gm1966	1.8519	0.0057495	0.181136	0.516527	0.401397	0.78277
ENSMUSG00000109715.1	Gm45606	-0.817595	0.00581829	0.181207	-0.378258	0.114943	0.591807
ENSMUSG00000020641.16	Rsad2	2.64422	0.00582107	0.181207	0.162928	0.859289	0.961297
ENSMUSG00000030357.10	Fkbp4	0.619173	0.00583325	0.181242	0.318786	0.100007	0.573748
ENSMUSG00000019823.17	Mical1	-0.695604	0.00591876	0.181355	-0.413056	0.0564578	0.509554
ENSMUSG00000113188.1	Gm35638	0.610045	0.00592507	0.181355	0.317156	0.105169	0.582277
ENSMUSG00000115247.1	AC113125.1	0.93627	0.00592878	0.181355	0.247329	0.402341	0.782917
ENSMUSG00000051851.5	Rtl8c	-1.14714	0.00601674	0.181355	-0.415764	0.189982	0.653458
ENSMUSG00000015312.9	Gadd45b	-0.784262	0.00603134	0.181355	-0.4567	0.0636152	0.520443
ENSMUSG00000106971.1	Gm42965	-1.68108	0.00605263	0.181355	-0.539844	0.236701	0.687413
ENSMUSG00000021998.16	Lcp1	0.803619	0.006081	0.181355	0.257414	0.287388	0.715388
ENSMUSG00000062901.3	Klhl24	-0.736995	0.00608717	0.181355	-0.0597789	0.774157	0.937515
ENSMUSG00000037940.17	Inpp4b	0.634779	0.00617646	0.183476	-0.160936	0.416522	0.789546
ENSMUSG00000025362.6	Rps26	-0.66293	0.00621804	0.184065	-0.203072	0.311252	0.728956
ENSMUSG00000022758.14	P2rx6	-1.07599	0.00624729	0.184065	0.36581	0.191659	0.65527
ENSMUSG00000099764.1	Rps10-ps2	-0.599689	0.0063303	0.184065	-0.105335	0.528882	0.841258
ENSMUSG00000020019.4	Ntn4	-1.24705	0.00636413	0.184065	-0.30099	0.363473	0.760056
ENSMUSG00000045128.9	Rpl18a	-0.702923	0.00646964	0.184065	-0.247645	0.251554	0.695053
ENSMUSG00000038260.10	Trpm4	-0.617509	0.00660738	0.185162	-0.153005	0.38643	0.775537
ENSMUSG00000030107.10	Usp18	1.79684	0.0066609	0.185496	0.376394	0.534068	0.844231
ENSMUSG00000057841.5	Rpl32	-0.599942	0.00667648	0.185496	-0.13289	0.464289	0.811687
ENSMUSG00000054555.11	Adam12	-0.659778	0.00673817	0.185496	-0.0788804	0.689089	0.907617
ENSMUSG00000044348.14	Slc25a53	-0.75055	0.00676238	0.185526	-0.0364298	0.858854	0.961271
ENSMUSG00000056856.12	Jakmip3	-1.17677	0.00686177	0.185526	-0.497279	0.141975	0.613792
ENSMUSG00000010051.15	Hyal1	1.09716	0.00686445	0.185526	0.199694	0.577091	0.862608
ENSMUSG00000054836.12	Elp6	0.591656	0.00686674	0.185526	0.363692	0.0663478	0.524748
ENSMUSG00000026726.10	Cubn	1.03281	0.00691051	0.185526	0.0724419	0.83118	0.954135
ENSMUSG00000063765.12	Chadl	-1.13709	0.00691477	0.185526	-0.192847	0.522504	0.838939
ENSMUSG00000025867.8	Cplx2	-0.998157	0.00695308	0.185526	-0.125798	0.641952	0.891978
ENSMUSG00000044276.2	4933427E11Rik	-1.9579	0.00698059	0.185526	-0.136237	0.779963	0.93914
ENSMUSG00000097113.7	Gm19705	0.777542	0.00698734	0.185526	0.303431	0.230154	0.683341
ENSMUSG00000079339.6	Ifit1bl1	3.11973	0.0069953	0.185526	0.455954	0.696146	0.909755
ENSMUSG00000026979.16	Psd4	0.886068	0.00703988	0.186374	0.176346	0.532133	0.842978
ENSMUSG00000078716.10	Tmem8b	-1.19625	0.00708584	0.186707	-0.484345	0.160867	0.632734
ENSMUSG00000027947.11	Il6ra	-0.704255	0.00710518	0.186787	-0.0471053	0.820082	0.950562
ENSMUSG00000033066.15	Gas7	-0.882034	0.00713637	0.186787	-0.421264	0.11467	0.591807
ENSMUSG00000110275.1	Gm5905	-0.671104	0.00718204	0.186787	-0.101799	0.591459	0.869126
ENSMUSG00000056531.11	Ccdc18	-0.718592	0.00718564	0.186787	-0.0213449	0.914698	0.978211
ENSMUSG00000025223.14	Ldb1	-0.60105	0.00719013	0.186787	-0.361569	0.0685425	0.528035
ENSMUSG00000026930.15	Gpsm1	-0.718708	0.00730866	0.188899	-0.338019	0.132282	0.605106
ENSMUSG00000071415.6	Rpl23	-0.63893	0.00738311	0.189909	-0.174361	0.378402	0.770196
ENSMUSG00000030703.8	Gdpd3	-0.985878	0.00738569	0.189909	-0.197846	0.469853	0.815112
ENSMUSG00000087331.8	1810021B22Rik	-0.911793	0.00742505	0.189909	0.0502843	0.836702	0.955645
ENSMUSG00000020289.15	Nprl3	-0.70083	0.00744519	0.189909	-0.169131	0.40569	0.784915
ENSMUSG00000028885.8	Smpdl3b	0.780524	0.00745073	0.189909	0.232842	0.359299	0.757429
ENSMUSG00000039742.15	Fam71f1	1.31967	0.00747943	0.18998	0.00737729	0.986988	0.998017
ENSMUSG00000091866.1	Gm6257	-0.970019	0.00753608	0.18998	0.0631001	0.806865	0.947234
ENSMUSG00000022090.10	Pdlim2	-0.592154	0.00754177	0.18998	-0.168816	0.338227	0.743054
ENSMUSG00000081100.1	Gm14630	-1.60829	0.0075488	0.18998	0.173593	0.705368	0.913686
ENSMUSG00000031755.6	Bbs2	-0.616977	0.00768029	0.19134	-0.179706	0.325445	0.736051
ENSMUSG00000027580.17	Helz2	1.08078	0.00769138	0.19134	0.359721	0.297762	0.720183
ENSMUSG00000115339.1	Gm48913	-1.90892	0.00771676	0.19134	0.0392964	0.941515	0.987191
ENSMUSG00000114419.1	5430414B19Rik	-1.3666	0.00784036	0.192765	-0.446771	0.249069	0.693349
ENSMUSG00000031824.15	6430548M08Rik	0.689286	0.00793585	0.194222	0.0777078	0.729084	0.921529
ENSMUSG00000033016.15	Nfatc1	-0.655286	0.00797274	0.194656	-0.129868	0.49755	0.829109
ENSMUSG00000035456.9	Prdm8	-1.62847	0.00800459	0.19475	-0.153834	0.717504	0.918044
ENSMUSG00000056724.15	Nbeal2	0.765369	0.00801083	0.19475	0.00313764	0.99	0.998311
ENSMUSG00000029468.17	P2rx7	-0.699831	0.00801499	0.19475	-0.460215	0.0510708	0.503051
ENSMUSG00000046245.13	Pilra	1.33646	0.00809866	0.195571	0.426036	0.348138	0.748953
ENSMUSG00000097134.2	1110002J07Rik	1.88657	0.00821219	0.19651	0.51774	0.434611	0.798498
ENSMUSG00000050762.5	Prss27	1.6079	0.00836104	0.197482	0.387102	0.487402	0.823869
ENSMUSG00000103933.1	Gm36964	-2.07881	0.00839828	0.197688	-0.127818	0.813955	0.948827
ENSMUSG00000045377.5	Tmem88	-0.651276	0.00841872	0.197688	-0.206523	0.293855	0.718058
ENSMUSG00000087165.7	2010001A14Rik	-0.728323	0.00849785	0.197895	0.177104	0.393314	0.779519
ENSMUSG00000006920.14	Ezh1	-0.602279	0.00851542	0.197895	-0.284131	0.143955	0.6167
ENSMUSG00000042688.16	Mapk6	0.628543	0.00854065	0.197895	-0.0383445	0.845295	0.958188
ENSMUSG00000097164.2	Cep83os	-0.72451	0.00865039	0.198314	0.00556323	0.978492	0.99654
ENSMUSG00000114493.1	Gm47071	-1.90944	0.00870717	0.198563	0.389987	0.391525	0.778942
ENSMUSG00000076136.1	Gm24951	-1.72914	0.00873024	0.198563	0.0527382	0.916762	0.978757
ENSMUSG00000057133.14	Chd6	-0.65102	0.00873659	0.198563	-0.305676	0.147236	0.621033
ENSMUSG00000078941.9	Ak6	0.606096	0.00885472	0.199994	0.370807	0.0783683	0.544149
ENSMUSG00000000386.15	Mx1	2.07084	0.0088617	0.199994	0.513509	0.49373	0.826134
ENSMUSG00000023055.10	Calcoco1	-0.687104	0.00887355	0.200039	-0.0432305	0.836752	0.955645
ENSMUSG00000032593.5	Amigo3	0.719896	0.0089085	0.20016	0.327359	0.181341	0.64929
ENSMUSG00000040022.14	Rab11fip2	-0.800556	0.00893446	0.200521	0.113447	0.61881	0.881984
ENSMUSG00000034614.14	Pik3ip1	-1.37383	0.00897005	0.200876	-0.328009	0.395982	0.78088
ENSMUSG00000078490.9	Cfap74	0.983476	0.00900748	0.201491	0.484418	0.15568	0.629451
ENSMUSG00000100615.1	Gm5511	0.910117	0.00903121	0.201551	-0.224471	0.491264	0.825102
ENSMUSG00000072940.5	Gm10443	-0.837078	0.0090499	0.201552	-0.0930387	0.69881	0.910537
ENSMUSG00000000938.11	Hoxa10	-0.614084	0.00910351	0.201799	-0.340039	0.0917726	0.564422
ENSMUSG00000055633.6	Zfp580	-1.00994	0.00916991	0.201814	-0.478308	0.131168	0.604339
ENSMUSG00000114649.1	3110006O06Rik	-1.75408	0.00918438	0.201814	-0.52296	0.322314	0.735014
ENSMUSG00000023030.16	Slc11a2	0.661273	0.00919972	0.201814	0.420754	0.0681542	0.526647
ENSMUSG00000034459.8	Ifit1	1.88886	0.00924239	0.201814	0.476966	0.481761	0.820969
ENSMUSG00000027339.15	Rassf2	-0.859155	0.00929105	0.201814	-0.301185	0.267653	0.706136
ENSMUSG00000026571.12	Dcaf6	-0.74614	0.00932242	0.201814	0.0578611	0.801041	0.94583
ENSMUSG00000090799.2	Klhl33	-1.66696	0.00932786	0.201814	-0.215489	0.627225	0.88669
ENSMUSG00000057863.6	Rpl36	-0.650839	0.00936392	0.201814	-0.139412	0.502705	0.831128
ENSMUSG00000006362.16	Cbfa2t3	-1.27828	0.00937517	0.201814	-0.530194	0.170231	0.641497
ENSMUSG00000048279.19	Sacs	0.639114	0.00937804	0.201814	0.0447469	0.832825	0.954318
ENSMUSG00000092097.1	Gm5819	-1.56941	0.00949595	0.202325	0.0813018	0.843663	0.957353
ENSMUSG00000030337.16	Vamp1	-0.648025	0.00950346	0.202325	-0.138714	0.476562	0.818087
ENSMUSG00000032733.6	Snx33	-0.798939	0.00963366	0.203178	-0.302686	0.228051	0.682842
ENSMUSG00000028410.13	Dnaja1	0.729828	0.00965768	0.203402	0.137287	0.56402	0.857924
ENSMUSG00000030584.14	Dpf1	0.83977	0.00968683	0.203402	-0.330486	0.286336	0.715176
ENSMUSG00000074813.13	Gm14005	-0.644413	0.00969596	0.203402	-0.263876	0.19573	0.658927
ENSMUSG00000028680.14	Plk3	0.79964	0.00982942	0.20413	0.554727	0.053312	0.504991
ENSMUSG00000045007.9	Tubg2	-0.834855	0.00985005	0.20413	-0.200155	0.423673	0.794152
ENSMUSG00000025877.14	Hk3	1.21955	0.00987955	0.20413	-0.053338	0.901906	0.974894
ENSMUSG00000039462.4	Col10a1	-1.35616	0.00988	0.20413	-0.151819	0.686428	0.906712
ENSMUSG00000024807.17	Syvn1	0.834013	0.00993454	0.204589	0.437502	0.127341	0.601966
ENSMUSG00000057605.4	Gm6807	-0.80814	0.00998785	0.204589	-0.130453	0.586064	0.866153
ENSMUSG00000067297.4	Ifit1bl2	2.18747	0.0100018	0.204589	0.147246	0.860173	0.961492
ENSMUSG00000028992.13	Nmnat1	0.688256	0.0100116	0.204589	0.402155	0.0990678	0.572972
ENSMUSG00000074622.4	Mafb	-0.703163	0.010139	0.20468	-0.348731	0.138346	0.609212
ENSMUSG00000020120.15	Plek	0.639158	0.0101824	0.20468	0.120892	0.562284	0.857102
ENSMUSG00000054409.5	Tmem74	1.5899	0.0103228	0.205132	0.413812	0.474362	0.817134
ENSMUSG00000004540.7	Psg17	1.13239	0.0103532	0.205132	0.213939	0.593271	0.870315
ENSMUSG00000114784.1	Gm47754	-1.48493	0.0103794	0.205451	0.00145574	0.997081	0.999409
ENSMUSG00000050957.4	Insl6	0.674962	0.0104408	0.206009	0.121622	0.597774	0.872052
ENSMUSG00000081929.1	Rps11-ps2	-0.718639	0.0105722	0.207046	-0.482831	0.0529358	0.504991
ENSMUSG00000036931.15	Nfkbid	0.841568	0.010616	0.207365	-0.0920893	0.757178	0.930697
ENSMUSG00000066571.13	4931406P16Rik	-0.704547	0.010711	0.207741	-0.385076	0.112357	0.590891
ENSMUSG00000002504.14	Slc9a3r2	-0.712687	0.0107511	0.207741	-0.319989	0.166399	0.638937
ENSMUSG00000025854.15	Fam20c	0.830057	0.0108887	0.209008	0.39509	0.174132	0.643763
ENSMUSG00000045932.12	Ifit2	1.268	0.0109324	0.209567	0.216475	0.629292	0.887526
ENSMUSG00000041797.7	Abca9	-1.23176	0.0109413	0.209567	-0.111424	0.749167	0.927968
ENSMUSG00000022636.13	Alcam	0.716603	0.0109628	0.209567	0.432407	0.0901794	0.56219
ENSMUSG00000026536.9	Ifi211	0.793054	0.0110322	0.209567	0.217383	0.433302	0.797972
ENSMUSG00000024803.8	Ankrd1	1.944	0.0111398	0.209567	0.35848	0.625177	0.885644
ENSMUSG00000068246.6	Apol9b	1.01555	0.0111657	0.209567	0.454073	0.211732	0.671089
ENSMUSG00000031214.13	Ophn1	-0.710815	0.0111957	0.209567	0.00858509	0.967843	0.99441
ENSMUSG00000020682.17	Mmp28	-1.58967	0.011231	0.20982	-0.409671	0.371119	0.764232
ENSMUSG00000050621.7	Rps27rt	-0.726991	0.0113022	0.2099	-0.412675	0.0949903	0.569563
ENSMUSG00000102269.1	Gm7357	0.93611	0.0114131	0.21056	0.358898	0.283983	0.714677
ENSMUSG00000074194.4	Zfp791	-0.881818	0.0114781	0.21056	-0.0557618	0.831789	0.954211
ENSMUSG00000020048.13	Hsp90b1	0.672811	0.0115069	0.210898	0.391087	0.100302	0.573748
ENSMUSG00000079334.8	Nat6	0.721487	0.0115489	0.211329	0.244707	0.334578	0.741365
ENSMUSG00000074604.9	Mgst2	-0.652484	0.0115513	0.211329	-0.121615	0.554315	0.853366
ENSMUSG00000006127.9	Inpp5k	-0.779851	0.0115888	0.211444	-0.142166	0.562355	0.857102
ENSMUSG00000073680.2	Tmem88b	-1.20173	0.0116775	0.211643	-0.226589	0.522913	0.839045
ENSMUSG00000029098.17	Acox3	-0.613279	0.0116919	0.211643	-0.189049	0.342632	0.744989
ENSMUSG00000045193.13	Cirbp	-1.16682	0.0117127	0.211643	-0.276514	0.442242	0.80222
ENSMUSG00000055963.12	Triqk	-0.923633	0.0117137	0.211643	-0.215175	0.444969	0.803697
ENSMUSG00000003814.8	Calr	0.693296	0.0118559	0.212683	0.473332	0.061055	0.518631
ENSMUSG00000026017.13	Carf	-0.647187	0.0119999	0.214668	-0.0339253	0.864891	0.962223
ENSMUSG00000081382.1	Rpl18-ps1	-0.724491	0.012018	0.214668	-0.10001	0.653111	0.896669
ENSMUSG00000023963.10	Cyp39a1	-1.01519	0.0121184	0.215865	-0.00835152	0.977658	0.996399
ENSMUSG00000074170.5	Plekhf1	-0.798217	0.012236	0.216928	-0.292991	0.260781	0.702257
ENSMUSG00000001588.12	Acap1	1.2943	0.0123407	0.217608	-0.0664847	0.891743	0.971249
ENSMUSG00000064264.14	Zfp428	0.674026	0.012359	0.217666	0.276442	0.251422	0.694858
ENSMUSG00000024897.8	Apba1	-0.784078	0.0124727	0.218342	-0.546941	0.0524366	0.50474
ENSMUSG00000097081.1	Gm10425	0.970688	0.012533	0.219208	0.492935	0.167895	0.639591
ENSMUSG00000043263.13	Ifi209	1.8863	0.0126058	0.219381	0.42835	0.553407	0.852925
ENSMUSG00000031965.15	Tbx20	0.789365	0.0126291	0.219381	0.137529	0.626483	0.886134
ENSMUSG00000041633.14	Kctd12b	-0.933432	0.0126718	0.219743	0.190836	0.491858	0.825213
ENSMUSG00000032661.9	Oas3	1.65661	0.0126961	0.219786	0.4135	0.50683	0.832502
ENSMUSG00000108437.1	Gm19366	-1.3911	0.0128081	0.220784	-0.352578	0.401443	0.782785
ENSMUSG00000097831.1	4930540M05Rik	-1.55332	0.01288	0.220899	0.360003	0.414317	0.78888
ENSMUSG00000000901.17	Mmp11	-0.906331	0.0130292	0.22158	-0.262194	0.381158	0.771866
ENSMUSG00000097183.2	Gm17501	-0.707661	0.0130469	0.22158	-0.137362	0.541122	0.84775
ENSMUSG00000097214.1	Gm19791	-0.862411	0.0131671	0.221594	-0.145635	0.586816	0.866768
ENSMUSG00000030156.5	Cd69	1.71787	0.0131827	0.221594	0.239562	0.717278	0.918033
ENSMUSG00000072621.13	Slfn10-ps	1.13701	0.0132936	0.222598	-0.0128902	0.975926	0.996178
ENSMUSG00000002409.18	Dyrk1b	-0.764102	0.0132973	0.222598	0.0252572	0.914005	0.978136
ENSMUSG00000106870.1	Gm43681	-0.605572	0.01333	0.222785	-0.319015	0.129406	0.603739
ENSMUSG00000020774.9	Aspa	-0.8066	0.0133916	0.22289	-0.128184	0.613566	0.87915
ENSMUSG00000017652.16	Cd40	1.17253	0.0136799	0.224994	0.350146	0.420828	0.792094
ENSMUSG00000069682.6	Gm10275	-0.586615	0.0137	0.224994	-0.164145	0.415495	0.78888
ENSMUSG00000042851.17	Zc3h6	-1.25363	0.0137394	0.225169	-0.300566	0.43669	0.799327
ENSMUSG00000085945.3	2310014F06Rik	-1.60215	0.0137528	0.225207	-0.201879	0.665664	0.90002
ENSMUSG00000031453.16	Rasa3	-0.851455	0.013778	0.225255	-0.206126	0.480753	0.820317
ENSMUSG00000026193.15	Fn1	-0.707314	0.0137962	0.225371	-0.391276	0.129969	0.603739
ENSMUSG00000031022.15	BC051019	2.3855	0.0139817	0.226199	0.558915	0.553599	0.852928
ENSMUSG00000049565.16	Aknad1	1.03029	0.0139885	0.226199	0.577164	0.137592	0.608327
ENSMUSG00000038253.6	Hoxa5	-0.839895	0.0140181	0.226264	-0.376103	0.185688	0.651524
ENSMUSG00000000204.16	Slfn4	2.74929	0.0140867	0.226286	0.489391	0.648689	0.894349
ENSMUSG00000033355.6	Rtp4	1.1668	0.0141025	0.226286	0.375213	0.387497	0.776257
ENSMUSG00000032193.9	Ldlr	0.748206	0.0142594	0.227475	0.539982	0.0578423	0.513007
ENSMUSG00000071855.4	Ccdc112	-0.593579	0.0143122	0.227918	-0.354342	0.0959065	0.570553
ENSMUSG00000034612.7	Chst11	-0.69951	0.0143952	0.228503	-0.428612	0.0969539	0.570553
ENSMUSG00000051504.18	Siglech	2.48504	0.0143999	0.228503	0.543416	0.590075	0.86875
ENSMUSG00000037375.16	Hhat	-0.600477	0.0146053	0.229986	-0.264374	0.202388	0.665483
ENSMUSG00000061684.5	Rpl21-ps8	-1.45419	0.0146157	0.229986	-0.222061	0.608709	0.877574
ENSMUSG00000037405.8	Icam1	0.907496	0.0146165	0.229986	0.391541	0.245636	0.692829
ENSMUSG00000018930.3	Ccl4	1.93105	0.0146228	0.229986	-0.406411	0.6238	0.884568
ENSMUSG00000090489.3	Gm17415	-1.52803	0.0147341	0.230291	-0.553311	0.265373	0.704583
ENSMUSG00000025969.15	Nrp2	0.728951	0.0148461	0.230814	-0.0457127	0.85612	0.960977
ENSMUSG00000061143.15	Maml3	-0.628798	0.0149026	0.231085	-0.306766	0.164745	0.636742
ENSMUSG00000027381.16	Bcl2l11	-0.673344	0.014947	0.231143	-0.359323	0.138587	0.609538
ENSMUSG00000082474.3	Gm8213	-1.43624	0.0149913	0.231651	-0.474617	0.29972	0.721527
ENSMUSG00000021453.2	Gadd45g	-0.650826	0.0150238	0.231801	-0.306962	0.178065	0.645924
ENSMUSG00000041220.10	Elovl6	0.596406	0.0150481	0.231823	0.396813	0.080163	0.550026
ENSMUSG00000030562.17	Nox4	-0.986006	0.0151337	0.232789	0.0722093	0.812532	0.948367
ENSMUSG00000034675.17	Dbn1	-1.04599	0.0153513	0.233424	-0.496428	0.183013	0.650122
ENSMUSG00000033855.15	Ston1	-0.597652	0.0153936	0.233424	-0.417094	0.0635337	0.520443
ENSMUSG00000106825.1	2510016D11Rik	-0.737589	0.0154125	0.233535	-0.484461	0.0748885	0.535883
ENSMUSG00000059479.7	B3gnt8	-0.705304	0.0155579	0.234422	-0.274623	0.255579	0.698658
ENSMUSG00000063903.5	Klk1	3.09701	0.0155791	0.234422	0.21441	0.872108	0.964577
ENSMUSG00000079138.3	Gm8818	1.68098	0.0156565	0.23457	0.520019	0.429975	0.796482
ENSMUSG00000047473.14	Zfp30	-0.655115	0.0156908	0.234574	-0.325913	0.159731	0.632734
ENSMUSG00000000126.11	Wnt9a	-1.01055	0.0157571	0.234927	-0.52154	0.148616	0.621095
ENSMUSG00000048807.2	Slc35e4	-0.745037	0.0157591	0.234927	0.0362797	0.887966	0.970131
ENSMUSG00000067203.7	H2-K2	0.757125	0.0158529	0.235156	0.306985	0.279542	0.712992
ENSMUSG00000040918.12	Slc19a2	0.870397	0.0158946	0.23522	0.248507	0.439538	0.800741
ENSMUSG00000071068.7	Treml2	0.830736	0.0159762	0.235638	0.265277	0.396504	0.780928
ENSMUSG00000068245.14	Phf11d	1.15871	0.015981	0.235638	0.34602	0.436572	0.799327
ENSMUSG00000085810.7	Gm16325	1.33327	0.0160856	0.236407	0.459346	0.372944	0.765577
ENSMUSG00000030283.7	St8sia1	2.78933	0.016106	0.236407	0.567743	0.628055	0.887226
ENSMUSG00000038037.5	Socs1	0.645562	0.0161416	0.236407	0.0533391	0.824241	0.951365
ENSMUSG00000054702.14	Ap1s3	1.51647	0.0162666	0.237484	0.407819	0.493758	0.826134
ENSMUSG00000097462.7	9530026P05Rik	-0.77751	0.0163475	0.238101	-0.406305	0.143354	0.616208
ENSMUSG00000024912.5	Fosl1	1.03204	0.0163845	0.238469	0.347137	0.359447	0.757451
ENSMUSG00000048249.14	Crebrf	-0.646234	0.0164693	0.239225	-0.117437	0.591497	0.869126
ENSMUSG00000034641.2	Cd300ld	1.09835	0.0164719	0.239225	0.354104	0.400351	0.782599
ENSMUSG00000057181.15	5730455P16Rik	-0.607733	0.0166326	0.240184	-0.319332	0.149496	0.622422
ENSMUSG00000005718.8	Tfap4	-0.635167	0.0167087	0.240599	-0.451486	0.0619112	0.519517
ENSMUSG00000023913.17	Pla2g7	-0.663018	0.0167487	0.240615	-0.321341	0.191822	0.65527
ENSMUSG00000055322.15	Tns1	-0.846023	0.0167734	0.240615	-0.40849	0.190734	0.654567
ENSMUSG00000087556.1	Gm15764	2.00334	0.0167886	0.240615	-0.141011	0.867361	0.962528
ENSMUSG00000039480.14	Nt5dc1	-0.695221	0.016841	0.240615	-0.160949	0.491214	0.825102
ENSMUSG00000022094.15	Slc39a14	0.774177	0.0168461	0.240615	0.319888	0.260807	0.702257
ENSMUSG00000028167.15	Bdh2	-0.702402	0.016862	0.240615	0.161677	0.478949	0.819684
ENSMUSG00000026946.9	Nmi	0.590426	0.0168768	0.240615	0.292428	0.193853	0.657048
ENSMUSG00000050503.8	Fbxl22	1.24371	0.0168796	0.240615	0.083515	0.86525	0.962223
ENSMUSG00000059775.5	Rps26-ps1	-0.646352	0.0169158	0.240615	-0.0883789	0.680112	0.904702
ENSMUSG00000038059.6	Smim3	0.678323	0.0169255	0.240615	0.111825	0.659203	0.898124
ENSMUSG00000114319.1	Gm47509	-1.83878	0.0169303	0.240615	-0.578457	0.301651	0.722829
ENSMUSG00000085687.1	Gm16153	-1.70513	0.0170258	0.240711	-0.285233	0.610413	0.878082
ENSMUSG00000029605.16	Oas1b	1.34492	0.01706	0.240711	0.376236	0.475797	0.817577
ENSMUSG00000022010.19	Tsc22d1	-0.620373	0.0171508	0.241312	-0.271877	0.233145	0.684556
ENSMUSG00000066191.12	Anks6	-0.911839	0.0171964	0.241619	-0.577952	0.0856888	0.556802
ENSMUSG00000111966.1	Gm5781	-0.622047	0.0172398	0.241845	-0.350644	0.125043	0.601184
ENSMUSG00000010307.7	Tmem86a	-0.632049	0.0174011	0.241845	-0.12571	0.560646	0.856084
ENSMUSG00000021880.7	Rnase6	1.56904	0.0174731	0.241845	0.126067	0.843744	0.957353
ENSMUSG00000026723.10	Trdmt1	-0.991365	0.0175947	0.242591	-0.466596	0.180622	0.648907
ENSMUSG00000055980.2	Irs1	-1.16474	0.0176004	0.242591	-0.26342	0.489678	0.824578
ENSMUSG00000023947.8	Nfkbie	0.800206	0.0177922	0.24424	0.554431	0.0783132	0.544142
ENSMUSG00000032501.9	Trib1	0.820399	0.0178669	0.244809	0.553513	0.0857821	0.556802
ENSMUSG00000101211.1	Gm28818	-1.05276	0.0181236	0.24662	0.334949	0.308288	0.72697
ENSMUSG00000032221.14	Mns1	0.637909	0.0181575	0.24675	0.149673	0.537661	0.8461
ENSMUSG00000057346.12	Apol9a	1.05731	0.0183024	0.248013	0.438933	0.290442	0.717397
ENSMUSG00000021947.11	Cryl1	-0.605378	0.0183319	0.248013	-0.0551435	0.787483	0.941356
ENSMUSG00000062874.6	Gm4978	-1.60829	0.0183959	0.248013	0.464241	0.391248	0.77862
ENSMUSG00000070327.14	Rnf213	0.842368	0.0184434	0.248013	0.0295528	0.922794	0.981164
ENSMUSG00000046747.8	Gm9812	-2.06921	0.0184827	0.248013	-0.045914	0.946134	0.988152
ENSMUSG00000025473.16	Adam8	0.882252	0.0185241	0.248405	-0.480945	0.154346	0.627518
ENSMUSG00000117333.1	AC154486.3	-0.755696	0.0187923	0.250181	-0.375961	0.171327	0.641571
ENSMUSG00000014905.4	Dnajb9	0.821843	0.0188609	0.250766	0.506967	0.119428	0.594781
ENSMUSG00000024349.9	Tmem173	0.641318	0.0190423	0.251407	0.37944	0.130128	0.603743
ENSMUSG00000097838.1	C530050E15Rik	1.76712	0.0190747	0.251407	0.576554	0.422972	0.79383
ENSMUSG00000026981.15	Il1rn	1.592	0.0191294	0.251539	-0.0830429	0.900133	0.974276
ENSMUSG00000089646.1	Gm15796	-1.5641	0.0191684	0.25172	-0.522118	0.317634	0.732549
ENSMUSG00000035208.16	Slfn8	0.859162	0.0193407	0.252675	0.0629519	0.850441	0.959199
ENSMUSG00000056836.8	Gm6851	0.834004	0.0193662	0.252845	0.313623	0.339933	0.74395
ENSMUSG00000031897.9	Psmb10	0.63896	0.0194041	0.253031	0.412318	0.103398	0.578715
ENSMUSG00000032690.16	Oas2	1.45653	0.0195848	0.2547	0.369905	0.531085	0.842454
ENSMUSG00000042428.6	Mgat3	-0.75928	0.0196353	0.254938	-0.346895	0.224505	0.680162
ENSMUSG00000021390.6	Ogn	-1.0559	0.0197886	0.255501	-0.0835019	0.830301	0.953528
ENSMUSG00000024424.14	Ttc39c	0.592036	0.0197943	0.255501	0.43635	0.0688702	0.528122
ENSMUSG00000113521.1	Gm29787	-0.639096	0.0198196	0.255501	-0.286615	0.219189	0.678227
ENSMUSG00000024112.16	Cacna1h	-2.95086	0.0198969	0.256311	-0.351475	0.648194	0.894032
ENSMUSG00000079507.10	H2-Q1	0.792521	0.0200247	0.256711	0.378452	0.228463	0.683116
ENSMUSG00000030641.10	Ddias	0.706434	0.0200695	0.256711	0.136254	0.622085	0.883633
ENSMUSG00000034685.4	Fam171a2	-0.606134	0.0200832	0.256711	-0.287099	0.199424	0.661345
ENSMUSG00000039253.7	Fn3krp	-0.651675	0.0201965	0.256711	-0.304856	0.203952	0.666341
ENSMUSG00000020186.7	Csrp2	-0.918744	0.0202159	0.256711	-0.276498	0.419647	0.791316
ENSMUSG00000106086.1	Gm43352	-1.22306	0.0203005	0.256782	-0.523634	0.222406	0.679208
ENSMUSG00000097166.1	9330179D12Rik	-1.5323	0.0203846	0.257191	-0.364444	0.462999	0.811629
ENSMUSG00000103436.1	Gm36995	-2.08287	0.0204459	0.257424	-0.432621	0.499432	0.82997
ENSMUSG00000093677.1	Gm20712	-0.669234	0.0205439	0.25793	-0.0930959	0.687179	0.907044
ENSMUSG00000055301.8	Adh7	-0.652815	0.0205815	0.258242	-0.280083	0.244823	0.692689
ENSMUSG00000078851.4	Hist3h2a	-0.587034	0.0206095	0.258275	-0.0857282	0.676837	0.904267
ENSMUSG00000028583.14	Pdpn	1.18615	0.020837	0.259568	0.121651	0.785285	0.940701
ENSMUSG00000033624.10	Pdpr	-0.585249	0.0210237	0.260986	-0.112195	0.591599	0.869149
ENSMUSG00000018474.17	Chd3	-0.605302	0.0210983	0.261389	-0.098385	0.663424	0.899807
ENSMUSG00000046169.10	Adamts6	-0.777797	0.0211352	0.261471	-0.111906	0.678144	0.904702
ENSMUSG00000038175.10	Mylip	-0.81476	0.021207	0.261607	-0.318839	0.283894	0.714559
ENSMUSG00000034853.16	Acot11	0.762082	0.0213224	0.26194	-0.0938605	0.7612	0.932326
ENSMUSG00000085271.7	E130006D01Rik	-1.64545	0.0213528	0.26194	-0.422593	0.438253	0.800199
ENSMUSG00000034764.15	1700006J14Rik	0.847288	0.021527	0.263586	0.244248	0.471592	0.816144
ENSMUSG00000023087.15	Noct	0.918255	0.0218314	0.26572	0.154803	0.660757	0.89851
ENSMUSG00000007279.14	Scube2	-2.39546	0.0221277	0.267318	-0.165616	0.811563	0.948351
ENSMUSG00000031381.16	Piga	0.89604	0.0222758	0.268381	0.257661	0.468676	0.814821
ENSMUSG00000097471.8	5830432E09Rik	0.899583	0.0223285	0.268537	-0.3083	0.425614	0.795071
ENSMUSG00000090272.8	Mndal	0.689379	0.0223882	0.268778	0.212334	0.437277	0.799648
ENSMUSG00000076483.1	Trbj1-1	1.54545	0.0228657	0.271776	0.569467	0.377172	0.769091
ENSMUSG00000084964.2	Gm15503	-1.70998	0.0229259	0.272014	-0.276766	0.615728	0.880578
ENSMUSG00000086522.1	Gm4473	-1.19825	0.0229989	0.272243	-0.372574	0.376094	0.767972
ENSMUSG00000057596.13	Trim30d	1.69722	0.0230335	0.272494	0.0049729	0.994711	0.999242
ENSMUSG00000024737.2	Slc15a3	1.0052	0.0231457	0.272866	0.154825	0.697515	0.910226
ENSMUSG00000083836.1	Ldha-ps2	1.83227	0.0232516	0.273044	-0.0607971	0.940413	0.9871
ENSMUSG00000022773.18	Ypel1	-1.31871	0.0234499	0.273591	0.184156	0.662037	0.899489
ENSMUSG00000063816.3	Gm4987	-0.621892	0.0234811	0.273798	-0.206059	0.369251	0.76275
ENSMUSG00000056870.9	Gulp1	-0.896853	0.0236466	0.274623	-0.178217	0.573155	0.861477
ENSMUSG00000108366.1	Gm5586	-0.588807	0.023664	0.274668	-0.243874	0.27308	0.71097
ENSMUSG00000029001.15	Fbxo44	-0.651291	0.0237016	0.274674	0.0534309	0.815777	0.949423
ENSMUSG00000034795.14	Ccdc122	-0.910572	0.0237611	0.274674	-0.309026	0.349948	0.750358
ENSMUSG00000040298.6	Btbd16	-1.91721	0.0239049	0.275205	-0.42594	0.497749	0.829109
ENSMUSG00000104748.1	Gm43592	1.8437	0.023921	0.275205	0.583762	0.458167	0.809522
ENSMUSG00000083289.1	Gm8812	-2.02504	0.0240447	0.275797	-0.24207	0.716433	0.917855
ENSMUSG00000074805.5	Il1bos	1.7515	0.0240604	0.275797	-0.583146	0.478906	0.819684
ENSMUSG00000038900.17	Rpl12	-0.587925	0.0241385	0.276224	-0.169806	0.459423	0.810177
ENSMUSG00000020372.15	Rack1	-0.641007	0.0242663	0.276632	-0.21542	0.393255	0.779519
ENSMUSG00000113302.1	Gm32219	0.693403	0.0242695	0.276632	0.178221	0.527723	0.840863
ENSMUSG00000026875.14	Traf1	0.641035	0.0243748	0.277364	0.421777	0.114389	0.591807
ENSMUSG00000063442.5	Gm7117	-1.09698	0.0245206	0.277882	-0.327209	0.399735	0.782599
ENSMUSG00000051242.1	Pcdhb9	-0.809177	0.0247729	0.278887	-0.0188108	0.94679	0.988175
ENSMUSG00000054065.12	Pkp3	0.720888	0.0248268	0.278887	0.250888	0.396158	0.780928
ENSMUSG00000054404.13	Slfn5	1.07956	0.0248405	0.278887	0.237856	0.5895	0.868392
ENSMUSG00000041957.15	Pkp2	1.1293	0.0249933	0.280047	0.350267	0.456214	0.80836
ENSMUSG00000056271.13	Lman1l	1.73675	0.0250081	0.280047	0.223095	0.771172	0.936344
ENSMUSG00000039496.8	Cdnf	-1.25012	0.0250631	0.280323	-0.17072	0.685994	0.906688
ENSMUSG00000073386.5	9830107B12Rik	2.45718	0.0251117	0.280441	0.174846	0.878189	0.96636
ENSMUSG00000075592.10	Nynrin	-0.60015	0.0251933	0.280441	-0.465816	0.0649422	0.522748
ENSMUSG00000019848.14	Popdc3	-2.66089	0.0252099	0.280441	-0.539999	0.496186	0.827992
ENSMUSG00000032766.9	Gng11	-0.592779	0.0252243	0.280441	-0.401332	0.0959269	0.570553
ENSMUSG00000078771.10	Evi2a	0.733627	0.0253625	0.280441	0.218425	0.463089	0.811646
ENSMUSG00000110830.1	Gm46218	1.18483	0.0254038	0.280441	-0.131929	0.802115	0.94583
ENSMUSG00000035042.2	Ccl5	1.21448	0.0254568	0.280441	0.27057	0.601233	0.874055
ENSMUSG00000038332.13	Sesn1	-1.03253	0.0255139	0.280441	-0.129275	0.736732	0.924115
ENSMUSG00000041046.7	Ramp3	0.725379	0.0255282	0.280441	-0.571935	0.0976012	0.570622
ENSMUSG00000028212.16	Ccne2	0.618315	0.0255283	0.280441	0.0226712	0.928813	0.983544
ENSMUSG00000106293.1	Gm42476	-1.81449	0.025573	0.280441	-0.0815332	0.886158	0.969488
ENSMUSG00000020788.15	Atp2a3	0.801175	0.0256075	0.280441	0.472993	0.1607	0.632734
ENSMUSG00000020793.5	Galr2	-0.784483	0.025777	0.280614	-0.456073	0.143021	0.615466
ENSMUSG00000032020.15	Ubash3b	0.70371	0.0259956	0.280614	0.288736	0.322582	0.735106
ENSMUSG00000024274.9	Zscan30	-1.14417	0.0260068	0.280614	-0.396167	0.341955	0.744963
ENSMUSG00000023931.5	Efhb	-2.375	0.0260137	0.280614	-0.127355	0.86104	0.961964
ENSMUSG00000027452.11	Acss1	-0.630663	0.0260158	0.280614	-0.350561	0.160312	0.632734
ENSMUSG00000022587.14	Ly6e	0.70513	0.0261268	0.281037	0.388963	0.17794	0.645924
ENSMUSG00000029442.18	Wdr66	1.10608	0.0262882	0.281476	0.52494	0.263014	0.70344
ENSMUSG00000031385.14	Plxnb3	-0.94566	0.0262999	0.281476	-0.397317	0.261431	0.702632
ENSMUSG00000053411.16	Cbx7	-0.61518	0.0263122	0.281476	-0.235823	0.318742	0.733077
ENSMUSG00000057280.15	Musk	-0.886595	0.026348	0.28152	-0.214227	0.505168	0.832192
ENSMUSG00000052013.15	Btla	1.99156	0.0264206	0.281663	0.506584	0.569374	0.86005
ENSMUSG00000027329.9	Spef1	1.02148	0.026482	0.281748	0.483723	0.264383	0.704408
ENSMUSG00000037239.8	Spred3	0.65368	0.0265435	0.282241	-0.45072	0.134034	0.60575
ENSMUSG00000042793.13	Lgr6	-1.09345	0.0266822	0.282528	-0.308948	0.432649	0.79753
ENSMUSG00000030255.13	Sspn	-0.682862	0.0267285	0.282528	-0.147757	0.558816	0.855104
ENSMUSG00000028217.11	Cdh17	1.2149	0.0267364	0.282528	0.223492	0.667475	0.90076
ENSMUSG00000034586.14	Hid1	-0.632103	0.0269133	0.283001	-0.117511	0.616892	0.881208
ENSMUSG00000059901.12	Adamts14	0.683785	0.0269156	0.283001	-0.111732	0.685683	0.906688
ENSMUSG00000062198.5	2700097O09Rik	0.703002	0.026941	0.283001	0.203085	0.488602	0.824359
ENSMUSG00000024620.11	Pdgfrb	-0.896006	0.0270158	0.283001	-0.309716	0.387806	0.776547
ENSMUSG00000033740.17	St18	-1.4201	0.0271392	0.283001	-0.415223	0.4058	0.784915
ENSMUSG00000041548.4	Hspb8	0.756093	0.0271485	0.283001	0.402135	0.198574	0.660795
ENSMUSG00000030376.8	Slc8a2	1.48735	0.0272074	0.283001	-0.0190311	0.977081	0.996265
ENSMUSG00000063568.11	Jazf1	0.892244	0.027269	0.283172	0.211927	0.575669	0.862325
ENSMUSG00000006311.8	Etv2	-1.57707	0.0272719	0.283172	0.0765161	0.881952	0.968024
ENSMUSG00000040219.4	Ttc12	-0.650229	0.0272984	0.283173	-0.2878	0.254575	0.698171
ENSMUSG00000048442.15	Smim5	2.27698	0.0273427	0.283173	-0.0151967	0.988639	0.998084
ENSMUSG00000080454.3	Gm24195	1.73942	0.0273556	0.283173	0.54536	0.475215	0.817486
ENSMUSG00000042804.13	Gpr153	-0.687636	0.0273765	0.283245	-0.20827	0.441565	0.801549
ENSMUSG00000115017.1	Gm2573	-0.594071	0.0274961	0.284012	-0.0314428	0.885993	0.969488
ENSMUSG00000042215.8	Bag2	0.610653	0.0275162	0.284012	-0.199777	0.447123	0.804501
ENSMUSG00000112145.1	Gm6218	-1.86214	0.0276134	0.284213	-0.446421	0.474077	0.817134
ENSMUSG00000023249.15	Parp3	0.607941	0.028113	0.286337	0.471159	0.0752952	0.536528
ENSMUSG00000041481.16	Serpina3g	1.42195	0.0281696	0.286374	0.0599245	0.9253	0.982509
ENSMUSG00000007379.15	Dennd2c	0.794608	0.0281893	0.286374	0.453384	0.183249	0.650122
ENSMUSG00000097327.7	E030030I06Rik	-0.683227	0.0282012	0.286374	-0.313495	0.242938	0.691367
ENSMUSG00000063953.3	Amd2	-0.831403	0.0282423	0.286529	-0.54246	0.110482	0.590026
ENSMUSG00000034463.4	Scara3	-0.604458	0.0283297	0.286674	-0.172198	0.47249	0.816461
ENSMUSG00000020262.15	Adarb1	-0.802476	0.0283935	0.28695	-0.0147013	0.962582	0.992772
ENSMUSG00000010154.7	Spire2	0.666487	0.0284035	0.28695	-0.0397436	0.88895	0.97041
ENSMUSG00000005087.17	Cd44	0.634337	0.028781	0.287712	-0.180924	0.480074	0.820022
ENSMUSG00000024043.13	Arhgap28	-0.979426	0.028806	0.287712	-0.252123	0.493746	0.826134
ENSMUSG00000087177.7	E130307A14Rik	-0.784	0.0288982	0.287712	-0.398279	0.202322	0.665483
ENSMUSG00000104621.1	Gm43185	-0.943311	0.0289765	0.287712	-0.405969	0.264238	0.704299
ENSMUSG00000022996.15	Wnt10b	-0.846397	0.0289792	0.287712	-0.168155	0.591855	0.8694
ENSMUSG00000038453.16	Srcin1	1.88995	0.0289843	0.287712	0.451819	0.595233	0.870489
ENSMUSG00000051486.5	Pcdhb11	-0.887459	0.0290137	0.287712	-0.229778	0.48634	0.823514
ENSMUSG00000079505.2	Gm11131	1.03255	0.029093	0.287856	0.45289	0.31026	0.728044
ENSMUSG00000043939.15	A530064D06Rik	1.3216	0.0291559	0.287856	-0.0022618	0.996982	0.999409
ENSMUSG00000017830.15	Dhx58	0.793038	0.0292508	0.288232	0.194233	0.563424	0.857885
ENSMUSG00000015947.10	Fcgr1	0.820081	0.0292976	0.288413	0.366375	0.285475	0.715151
ENSMUSG00000039157.12	Fam102a	-1.00164	0.029321	0.288459	-0.20574	0.580539	0.863768
ENSMUSG00000067714.13	Lpar5	-1.2131	0.0295257	0.288816	-0.39713	0.372064	0.765055
ENSMUSG00000106390.1	Gm5551	0.885677	0.029572	0.288816	0.489414	0.204473	0.666517
ENSMUSG00000048806.4	Ifnb1	2.04168	0.0297624	0.289894	0.369343	0.692572	0.909239
ENSMUSG00000027254.13	Map1a	0.680636	0.0301575	0.292199	-0.275431	0.348803	0.749165
ENSMUSG00000057706.7	Mex3b	-0.781704	0.0303473	0.292964	-0.32649	0.287096	0.715388
ENSMUSG00000031391.18	L1cam	0.946793	0.0303497	0.292964	0.0866406	0.834349	0.954771
ENSMUSG00000072964.14	Bhlhb9	-0.640326	0.0304214	0.292994	-0.0467205	0.848539	0.959109
ENSMUSG00000033405.4	Nudt15	0.925299	0.0306209	0.293628	0.472427	0.242383	0.691182
ENSMUSG00000053040.13	Aph1c	-0.824516	0.0307055	0.293785	-0.575432	0.0973618	0.570553
ENSMUSG00000022358.7	Fbxo32	-1.03004	0.0307121	0.293785	-0.116096	0.764606	0.933801
ENSMUSG00000026475.7	Rgs16	2.18325	0.0309017	0.294739	0.493643	0.595556	0.870739
ENSMUSG00000028362.2	Tnfsf8	1.47717	0.0309045	0.294739	0.56694	0.389261	0.777385
ENSMUSG00000034833.10	Tespa1	1.45706	0.0309136	0.294739	0.113152	0.865876	0.962253
ENSMUSG00000036181.2	Hist1h1c	-0.840453	0.0311051	0.295317	0.220371	0.485308	0.823405
ENSMUSG00000020407.13	Upp1	0.954378	0.0311615	0.295593	-0.252288	0.542918	0.848598
ENSMUSG00000097820.3	E530011L22Rik	-0.947873	0.0311882	0.295593	-0.533827	0.167304	0.639591
ENSMUSG00000056214.8	Pard6g	-0.824518	0.0311926	0.295593	-0.309034	0.335217	0.741365
ENSMUSG00000048040.8	Arxes2	-0.920624	0.0313244	0.295629	-0.453215	0.216378	0.675169
ENSMUSG00000087113.1	Gm11714	2.23435	0.031353	0.295629	-0.514535	0.654232	0.896994
ENSMUSG00000056656.6	Apol8	-1.18003	0.0313901	0.295629	-0.530281	0.241187	0.69035
ENSMUSG00000116215.1	Gm5470	-0.952412	0.0314376	0.295629	0.327247	0.338162	0.743053
ENSMUSG00000035916.8	Ptprq	1.13617	0.0314532	0.295629	-0.0980676	0.850226	0.959199
ENSMUSG00000023206.16	Il15ra	0.889666	0.0314692	0.295629	0.30774	0.427499	0.796031
ENSMUSG00000084797.1	Gm14321	0.727357	0.0314779	0.295629	-0.0447582	0.889112	0.97041
ENSMUSG00000073402.11	Gm8909	0.61259	0.0315782	0.295629	0.239838	0.357229	0.755405
ENSMUSG00000054967.7	Zfp647	-1.0181	0.0316761	0.296006	-0.189578	0.613618	0.87915
ENSMUSG00000083860.2	Gm13313	-1.1701	0.031822	0.296603	-0.331703	0.449911	0.805593
ENSMUSG00000112727.1	Gm17794	1.00963	0.0321123	0.297557	0.109235	0.809078	0.947551
ENSMUSG00000041477.14	Dcp1b	-0.883766	0.0321921	0.297557	-0.266632	0.432184	0.79753
ENSMUSG00000059213.7	Ddn	-1.39668	0.0322064	0.297557	-0.395451	0.475416	0.8175
ENSMUSG00000023074.11	Mospd1	-0.60918	0.0323584	0.297686	-0.0791652	0.735566	0.9236
ENSMUSG00000087265.1	Gm12349	-1.92086	0.0323761	0.297686	0.564764	0.372997	0.765577
ENSMUSG00000107164.1	4933425D22Rik	-2.15928	0.0323945	0.297686	-0.279447	0.695955	0.909755
ENSMUSG00000042675.15	Ypel3	-0.658408	0.0323949	0.297686	0.0968191	0.70384	0.913114
ENSMUSG00000033880.11	Lgals3bp	0.663588	0.0323964	0.297686	0.245501	0.378039	0.770084
ENSMUSG00000029377.5	Ereg	1.56554	0.0328093	0.30008	0.414754	0.549907	0.851192
ENSMUSG00000026896.14	Ifih1	0.779343	0.032831	0.30008	0.161546	0.633913	0.889513
ENSMUSG00000059830.3	Gm16380	0.646672	0.0329698	0.300572	0.339913	0.231967	0.683415
ENSMUSG00000104861.1	3110039M20Rik	-0.720291	0.0329855	0.300572	-0.201721	0.4733	0.816734
ENSMUSG00000086528.1	Gm15731	-1.24112	0.0330044	0.300572	-0.527884	0.27155	0.709257
ENSMUSG00000076281.1	Gm24270	0.905222	0.033051	0.300645	0.390246	0.329727	0.738718
ENSMUSG00000095841.2	Gm8532	1.47293	0.0330681	0.300645	-0.529745	0.443076	0.802564
ENSMUSG00000020806.15	Rhbdf2	0.69156	0.0331273	0.300645	-0.0554957	0.851711	0.959434
ENSMUSG00000074361.10	C5ar2	-1.13931	0.0331458	0.300645	-0.520335	0.246741	0.693349
ENSMUSG00000040483.15	Xaf1	0.991609	0.0332396	0.300645	0.241638	0.583486	0.864927
ENSMUSG00000026770.5	Il2ra	1.8523	0.0332406	0.300645	-0.184528	0.840718	0.956263
ENSMUSG00000093553.1	Gm20633	-1.06627	0.0332799	0.300645	-0.14203	0.718541	0.918676
ENSMUSG00000072494.7	Ppp1r3e	0.843873	0.0332815	0.300645	0.155654	0.676619	0.904267
ENSMUSG00000021772.15	Nkiras1	0.664555	0.0334121	0.301288	0.445053	0.133827	0.60575
ENSMUSG00000043398.5	Gpr135	-0.707499	0.033459	0.301577	-0.162356	0.555395	0.854053
ENSMUSG00000050288.6	Fzd2	-0.823486	0.0335503	0.301982	-0.450849	0.194035	0.657114
ENSMUSG00000083116.1	Gm13410	-0.676005	0.0336272	0.302154	-0.418752	0.144009	0.616707
ENSMUSG00000087366.7	Junos	0.734699	0.0336724	0.302216	0.5593	0.0938269	0.566901
ENSMUSG00000033368.8	Trim69	1.97195	0.0337131	0.302216	0.196596	0.835626	0.955645
ENSMUSG00000079492.2	Gm11127	0.774383	0.0337324	0.302216	0.454903	0.188192	0.651871
ENSMUSG00000039997.16	Ifi203	0.722828	0.0338872	0.302613	0.281763	0.364916	0.76087
ENSMUSG00000106022.1	Gm42929	-0.829345	0.033973	0.302796	-0.189431	0.552015	0.852563
ENSMUSG00000037913.12	Tmem156	0.670468	0.0340067	0.302796	-0.230277	0.455755	0.808294
ENSMUSG00000098090.7	2700099C18Rik	-0.652696	0.0341626	0.302929	-0.319989	0.23481	0.68631
ENSMUSG00000087107.8	AI662270	0.611658	0.0342361	0.302929	0.454566	0.100807	0.574504
ENSMUSG00000052293.14	Taf9	-1.38775	0.0343334	0.302931	-0.295794	0.563629	0.857924
ENSMUSG00000093606.1	B130034C11Rik	-1.14316	0.0346313	0.303464	0.253133	0.53551	0.844951
ENSMUSG00000027204.13	Fbn1	-0.643451	0.0347438	0.303464	-0.504261	0.0842363	0.556634
ENSMUSG00000002325.15	Irf9	0.623745	0.0347963	0.303464	0.126323	0.639871	0.891323
ENSMUSG00000090084.7	Srpx	-0.803345	0.0348302	0.303464	-0.129898	0.676005	0.903879
ENSMUSG00000007888.15	Crlf1	-1.48852	0.0348303	0.303464	-0.199884	0.703921	0.913114
ENSMUSG00000098203.1	Gm9568	1.13467	0.034837	0.303464	0.175639	0.732865	0.92319
ENSMUSG00000103715.1	4933431K14Rik	0.874156	0.034862	0.303464	0.556004	0.162481	0.634141
ENSMUSG00000085289.1	Gm15337	0.943763	0.034925	0.303501	0.515467	0.227315	0.682047
ENSMUSG00000043251.6	Exoc3l	-0.703673	0.0349284	0.303501	-0.521176	0.0925614	0.564422
ENSMUSG00000073234.4	Gm8773	0.783934	0.0349951	0.303515	0.362258	0.30355	0.723876
ENSMUSG00000021575.16	Ahrr	-1.13439	0.0350042	0.303515	0.0165632	0.967917	0.99441
ENSMUSG00000066829.7	Zfp810	-0.648416	0.0350886	0.303588	-0.132029	0.605747	0.87598
ENSMUSG00000030259.12	Rassf8	-0.661141	0.0353006	0.304858	-0.474036	0.105448	0.582277
ENSMUSG00000093577.1	Gm20632	-1.41246	0.0354277	0.305091	-0.311602	0.548644	0.850414
ENSMUSG00000085633.1	Bloc1s6os	-1.27227	0.0354973	0.305121	-0.271038	0.597784	0.872052
ENSMUSG00000085342.1	Gm12254	-0.854798	0.0355003	0.305121	-0.163945	0.619088	0.882132
ENSMUSG00000098183.1	Gm27010	-0.782736	0.0355613	0.305121	-0.348315	0.277304	0.712926
ENSMUSG00000116289.1	Gm31342	1.55619	0.0356077	0.305121	0.178486	0.809042	0.947551
ENSMUSG00000090186.5	Gm7592	1.87945	0.0356088	0.305121	0.130028	0.885301	0.969424
ENSMUSG00000003541.6	Ier3	1.76396	0.0356265	0.305121	-0.281164	0.73778	0.924443
ENSMUSG00000099034.7	2810039B14Rik	-0.77681	0.0356268	0.305121	0.220358	0.455066	0.807811
ENSMUSG00000032425.15	Zfp949	-0.596436	0.03571	0.305142	-0.0910327	0.699979	0.911232
ENSMUSG00000025225.14	Nfkb2	0.586306	0.0358287	0.305267	0.510245	0.0607618	0.518631
ENSMUSG00000052026.7	Slc6a7	-1.56179	0.0358639	0.305267	0.371256	0.499561	0.829979
ENSMUSG00000076614.7	Ighg1	2.61702	0.0358753	0.305267	-0.249276	0.859707	0.961297
ENSMUSG00000038523.10	1700003F12Rik	-2.13143	0.0359649	0.305496	-0.399253	0.594341	0.870489
ENSMUSG00000040327.16	Cul9	-0.624809	0.0359716	0.305496	-0.0570845	0.816404	0.949718
ENSMUSG00000066438.6	Plekhd1	1.70709	0.036099	0.306065	-0.310801	0.706426	0.913884
ENSMUSG00000045631.10	Tmprss12	-0.911403	0.0361677	0.306204	-0.480538	0.200957	0.66393
ENSMUSG00000029798.11	Herc6	1.1973	0.036206	0.306204	0.518754	0.344711	0.74615
ENSMUSG00000062997.6	Rpl35	-0.620246	0.0364229	0.306952	-0.110511	0.671938	0.902819
ENSMUSG00000046807.10	Lrrc75b	-1.07419	0.0364374	0.306952	0.0481619	0.904215	0.975312
ENSMUSG00000114739.1	Gm47885	-0.980647	0.0364761	0.306989	-0.204321	0.59259	0.869913
ENSMUSG00000030830.18	Itgal	1.07109	0.0365624	0.306989	0.310995	0.519655	0.837991
ENSMUSG00000020381.10	Mrnip	-0.64169	0.0365823	0.306989	0.086656	0.72839	0.921277
ENSMUSG00000086016.1	1700084C06Rik	1.44598	0.0366708	0.306989	0.407276	0.542506	0.848482
ENSMUSG00000030091.17	Nup210	0.852447	0.0367045	0.306989	0.42615	0.269821	0.707782
ENSMUSG00000004266.15	Ptpn6	0.637656	0.0369652	0.307542	0.414422	0.148957	0.621721
ENSMUSG00000096975.1	Gm16386	-0.964471	0.0369999	0.307615	0.319503	0.368316	0.76237
ENSMUSG00000082292.3	Gm12250	1.49426	0.0370234	0.307615	0.173534	0.80753	0.947382
ENSMUSG00000022415.12	Syngr1	-0.892223	0.0371427	0.308051	-0.547868	0.15055	0.623255
ENSMUSG00000024511.15	Rab27b	0.678728	0.0371806	0.308051	0.353026	0.250613	0.694303
ENSMUSG00000085890.7	Tnfsf13os	-1.06796	0.0372097	0.308051	-0.502585	0.249298	0.693431
ENSMUSG00000114575.1	Gm47814	1.02427	0.0372155	0.308051	-0.206674	0.675697	0.903705
ENSMUSG00000028778.15	Hcrtr1	-2.50226	0.0372383	0.308051	-0.362458	0.658649	0.898124
ENSMUSG00000022018.7	Rgcc	-0.749877	0.0372531	0.308051	-0.32398	0.30245	0.723273
ENSMUSG00000006403.13	Adamts4	-0.800693	0.0374619	0.308051	-0.228489	0.497978	0.829206
ENSMUSG00000079293.11	Clec7a	1.40365	0.0375562	0.308051	0.471531	0.470652	0.815528
ENSMUSG00000033170.14	Card10	0.631978	0.0376348	0.308051	-0.153985	0.591178	0.869083
ENSMUSG00000062007.13	Hsh2d	1.91207	0.0378118	0.308593	-0.256827	0.794938	0.944445
ENSMUSG00000111047.1	Gm4780	-1.65378	0.0379254	0.309166	0.145393	0.816121	0.949605
ENSMUSG00000067121.2	Gm7027	-1.08693	0.0379277	0.309166	-0.391522	0.367296	0.762006
ENSMUSG00000071112.12	Spx	1.12063	0.0380899	0.310239	0.407947	0.430175	0.796522
ENSMUSG00000070305.10	Mpzl3	0.702639	0.0382738	0.310842	0.542619	0.0975787	0.570622
ENSMUSG00000063229.15	Ldha	0.731198	0.0383171	0.310842	0.234333	0.45791	0.809369
ENSMUSG00000072244.11	Trim6	1.23844	0.0383171	0.310842	0.285614	0.622514	0.883786
ENSMUSG00000029322.12	Plac8	-0.994432	0.0384198	0.311301	-0.413481	0.338547	0.743054
ENSMUSG00000112398.1	9230102K24Rik	-1.49935	0.0386505	0.312179	-0.36589	0.522342	0.838898
ENSMUSG00000103313.1	Gm38357	1.11463	0.0387778	0.312601	-0.392109	0.482205	0.821141
ENSMUSG00000107658.1	Gm44958	-0.600786	0.0388363	0.312737	-0.16012	0.515421	0.836993
ENSMUSG00000036353.13	P2ry12	-0.846578	0.0389889	0.312851	0.0579649	0.858711	0.961271
ENSMUSG00000072620.3	Slfn2	0.602901	0.0390776	0.312851	0.222137	0.408358	0.787186
ENSMUSG00000030921.17	Trim30a	0.857909	0.0392546	0.312851	0.282227	0.466124	0.812892
ENSMUSG00000073409.12	H2-Q6	0.78631	0.0393057	0.312851	0.275026	0.429103	0.796194
ENSMUSG00000022211.9	Carmil3	-0.960305	0.0393807	0.312851	-0.0800718	0.829556	0.953264
ENSMUSG00000078776.9	9530053A07Rik	2.1641	0.0395094	0.312851	0.273652	0.801784	0.94583
ENSMUSG00000081051.4	Gm15427	-0.605923	0.0395583	0.312851	-0.0573772	0.819435	0.950435
ENSMUSG00000039146.5	Ifi44l	1.27075	0.0395598	0.312851	0.341552	0.570006	0.860194
ENSMUSG00000037428.14	Vgf	1.92759	0.0395715	0.312851	0.419739	0.652461	0.8962
ENSMUSG00000028036.6	Ptgfr	-1.04431	0.0395919	0.312851	0.102967	0.814202	0.949006
ENSMUSG00000113198.1	Gm6988	-0.658512	0.0396004	0.312851	-0.42116	0.148311	0.621033
ENSMUSG00000034777.2	Vax2	-0.73687	0.0396049	0.312851	-0.240086	0.428781	0.796194
ENSMUSG00000034573.14	Ptpn13	-0.816889	0.0397259	0.313134	-0.180258	0.597787	0.872052
ENSMUSG00000105852.4	Gm42890	-1.57246	0.039803	0.313339	-0.422825	0.487366	0.823869
ENSMUSG00000039193.8	Nlrc4	-0.598542	0.0398275	0.313339	-0.247844	0.32804	0.737516
ENSMUSG00000034910.5	Pygo1	-1.74148	0.0398296	0.313339	-0.532184	0.413668	0.78881
ENSMUSG00000037379.7	Spon2	-0.67112	0.039974	0.313611	0.0313739	0.913094	0.97788
ENSMUSG00000026581.14	Sell	1.99044	0.0399792	0.313611	0.345641	0.726762	0.920983
ENSMUSG00000028358.15	Zfp618	0.958757	0.039988	0.313611	-0.212515	0.6475	0.893804
ENSMUSG00000005124.10	Wisp1	-0.992823	0.0400321	0.313611	-0.362756	0.401001	0.782599
ENSMUSG00000097792.1	Gm27042	1.20583	0.0400422	0.313611	0.398498	0.483	0.821507
ENSMUSG00000111535.1	Gm35154	-1.09929	0.0401332	0.313995	-0.149255	0.722946	0.920045
ENSMUSG00000053835.17	H2-T24	1.16162	0.0401806	0.314005	0.331639	0.544523	0.849063
ENSMUSG00000092464.1	Gm8902	0.760393	0.0403138	0.314363	0.192335	0.58199	0.864332
ENSMUSG00000042622.14	Maff	1.1222	0.0403315	0.314363	0.216977	0.677282	0.904514
ENSMUSG00000055413.12	H2-Q5	0.645642	0.0404674	0.31475	0.274394	0.34522	0.746663
ENSMUSG00000034220.7	Gpc1	-0.605175	0.0406269	0.314992	-0.434972	0.120404	0.595225
ENSMUSG00000096035.2	Odaph	0.736379	0.040629	0.314992	0.328384	0.333242	0.740947
ENSMUSG00000086860.1	Gm1720	1.87966	0.0407047	0.314992	0.00665523	0.994439	0.999218
ENSMUSG00000047146.17	Tet1	-0.887233	0.040714	0.314992	-0.304856	0.402334	0.782917
ENSMUSG00000021830.14	Txndc16	-0.590201	0.0408679	0.314992	-0.0926104	0.701984	0.912249
ENSMUSG00000030206.13	Gsg1	-0.811209	0.0408917	0.314992	-0.521223	0.14514	0.618474
ENSMUSG00000102833.1	Gm9694	1.44969	0.0409428	0.314992	0.370148	0.589157	0.868331
ENSMUSG00000006818.5	Sod2	0.606076	0.040956	0.314992	0.370903	0.182343	0.649616
ENSMUSG00000081233.1	Gm12857	-1.80711	0.04097	0.314992	-0.211635	0.753591	0.929373
ENSMUSG00000078937.8	Cpt1b	-1.36591	0.0411178	0.314992	-0.283065	0.590593	0.868993
ENSMUSG00000034422.14	Parp14	0.840903	0.041164	0.315042	0.230516	0.539888	0.847208
ENSMUSG00000054622.4	D730045B01Rik	1.27798	0.0414115	0.315831	0.0154442	0.980333	0.99698
ENSMUSG00000083261.4	Gm7816	0.966325	0.0414252	0.315831	0.354179	0.432741	0.797578
ENSMUSG00000047363.4	Cstad	-1.54656	0.0415104	0.315831	-0.0638587	0.909776	0.976844
ENSMUSG00000081219.1	Bambi-ps1	0.95889	0.0415488	0.315838	0.510668	0.258457	0.70044
ENSMUSG00000084215.3	Gm11814	0.731232	0.0416396	0.315838	0.331638	0.327692	0.737416
ENSMUSG00000061393.14	Acvr2b	-0.678603	0.0418368	0.316052	-0.168917	0.548083	0.850003
ENSMUSG00000073795.11	6430531B16Rik	1.31139	0.0419835	0.316302	-0.0202274	0.975165	0.996178
ENSMUSG00000086533.2	Mypopos	0.589965	0.0421624	0.316398	0.11405	0.674287	0.903252
ENSMUSG00000071042.11	Rasgrp3	-0.735184	0.0422045	0.316398	-0.46297	0.156944	0.630769
ENSMUSG00000045657.3	Pcdhb10	-0.948818	0.0422804	0.316658	-0.0811749	0.827408	0.952578
ENSMUSG00000094852.3	Gm9034	1.74719	0.0425267	0.317446	0.279224	0.747215	0.927456
ENSMUSG00000070960.4	Gm19680	-0.631411	0.0426909	0.317925	0.0732494	0.773762	0.937433
ENSMUSG00000087252.1	Gm14379	-1.35959	0.0426916	0.317925	0.279906	0.57714	0.862608
ENSMUSG00000109933.1	Gm7600	-1.74589	0.0427795	0.318147	-0.45955	0.483083	0.821507
ENSMUSG00000086513.3	9130208D14Rik	1.12444	0.0427929	0.318147	0.201597	0.709007	0.914171
ENSMUSG00000002100.15	Mybpc3	0.972425	0.0428737	0.318628	0.130883	0.777879	0.938892
ENSMUSG00000084808.7	9430091E24Rik	-0.686464	0.0429585	0.318795	-0.398386	0.189747	0.653441
ENSMUSG00000042708.12	Shcbp1l	1.7988	0.0429917	0.31884	0.305099	0.734071	0.923525
ENSMUSG00000040229.11	Gpr34	-1.00276	0.0433345	0.320063	0.00984128	0.979966	0.99698
ENSMUSG00000080708.1	Ccnd3-ps	0.735424	0.043439	0.320211	0.243703	0.477554	0.818703
ENSMUSG00000085228.1	Gm14376	-1.77338	0.0434983	0.320211	0.244448	0.705557	0.913686
ENSMUSG00000032377.8	Plscr4	-0.719712	0.0435118	0.320211	-0.55635	0.096764	0.570553
ENSMUSG00000031849.9	Comp	-1.12455	0.0435881	0.32042	-0.274868	0.539439	0.846915
ENSMUSG00000025997.13	Ikzf2	0.70177	0.0436633	0.320634	-0.0939426	0.778991	0.938892
ENSMUSG00000039232.12	Stx11	0.954496	0.0436646	0.320634	0.569847	0.210091	0.670253
ENSMUSG00000113536.1	Gm49327	-1.07194	0.0437289	0.320851	-0.460874	0.30175	0.722981
ENSMUSG00000052921.13	Arhgef15	-0.619164	0.0437574	0.320851	-0.500292	0.0865391	0.557335
ENSMUSG00000033208.7	S100b	-0.99271	0.0443691	0.322738	-0.2683	0.51387	0.83586
ENSMUSG00000073130.9	Gm1141	1.57402	0.0445301	0.322917	0.370148	0.630201	0.887926
ENSMUSG00000116238.1	Gm49413	-1.66266	0.0445433	0.322917	-0.170479	0.794635	0.944399
ENSMUSG00000040272.14	Accs	-0.644663	0.0447602	0.323892	-0.111094	0.679592	0.904702
ENSMUSG00000086328.1	2700033N17Rik	-0.82406	0.0447813	0.323892	-0.195321	0.567166	0.859355
ENSMUSG00000105554.1	Gm7118	1.02656	0.0448622	0.324054	-0.417505	0.430739	0.796723
ENSMUSG00000022747.17	St3gal6	0.931966	0.0451811	0.325241	0.43382	0.329145	0.738438
ENSMUSG00000113070.1	Gm48420	-0.928633	0.0451897	0.325241	0.292123	0.422386	0.793413
ENSMUSG00000030966.13	Trim21	0.710166	0.0452565	0.325405	0.118129	0.725186	0.920633
ENSMUSG00000082260.3	Gm7429	-0.682856	0.0453333	0.325466	-0.078392	0.779944	0.93914
ENSMUSG00000108109.1	Gm44287	1.33739	0.0456606	0.326302	-0.0275101	0.96677	0.994111
ENSMUSG00000053338.9	Tarm1	1.48119	0.045716	0.326302	-0.183645	0.814632	0.949107
ENSMUSG00000026222.16	Sp100	0.763667	0.0457279	0.326302	0.280889	0.432612	0.79753
ENSMUSG00000057897.14	Camk2b	1.80114	0.0458303	0.326619	-0.273613	0.780646	0.93931
ENSMUSG00000115044.1	Gm48978	1.74556	0.045901	0.326808	-0.0217873	0.98048	0.99698
ENSMUSG00000017390.15	Aldoc	1.00236	0.0459237	0.326808	0.276799	0.564299	0.857989
ENSMUSG00000044813.15	Shb	0.591364	0.0459356	0.326808	0.206503	0.456468	0.808562
ENSMUSG00000032349.13	Elovl5	0.699544	0.0460719	0.326808	0.55338	0.101811	0.575548
ENSMUSG00000060176.4	Kif27	-0.948574	0.0462318	0.327399	-0.25508	0.520357	0.838191
ENSMUSG00000038550.10	Ciart	1.14575	0.0464905	0.328208	-0.584341	0.350193	0.750358
ENSMUSG00000109130.1	Gm45187	1.03766	0.0466327	0.328405	0.502442	0.315702	0.731898
ENSMUSG00000079445.3	B3gnt7	0.764798	0.0466491	0.328405	0.126404	0.729519	0.921792
ENSMUSG00000029561.17	Oasl2	1.27309	0.046792	0.328851	0.0812139	0.897021	0.973093
ENSMUSG00000025058.4	5430427O19Rik	0.82936	0.0469094	0.328851	0.221211	0.577586	0.862608
ENSMUSG00000021614.16	Vcan	-0.639812	0.0471181	0.329506	-0.335995	0.260286	0.701785
ENSMUSG00000097954.1	Gm4217	0.942851	0.0471303	0.329506	-0.211989	0.658575	0.898124
ENSMUSG00000079502.8	Cfap77	-1.80016	0.0472813	0.330334	-0.528608	0.45836	0.809676
ENSMUSG00000101389.1	Ms4a4a	-1.5203	0.0473638	0.330455	-0.330204	0.583256	0.864927
ENSMUSG00000052749.9	Trim30b	1.78868	0.0475173	0.331061	0.0163028	0.986205	0.997854
ENSMUSG00000074800.4	Gm4149	-0.639073	0.0478499	0.331227	-0.202739	0.465466	0.812571
ENSMUSG00000024430.13	Cabyr	-1.69331	0.0479232	0.331511	-0.415707	0.533321	0.844024
ENSMUSG00000042498.16	D330045A20Rik	1.09198	0.0479236	0.331511	0.429485	0.419133	0.79113
ENSMUSG00000109111.1	6530437J22Rik	1.01765	0.0480713	0.331967	0.431986	0.382176	0.77277
ENSMUSG00000037661.14	Gpr160	-0.8614	0.0481049	0.332077	-0.310541	0.401078	0.7826
ENSMUSG00000022584.14	Ly6c2	1.97205	0.0481939	0.332248	0.140929	0.89354	0.971769
ENSMUSG00000026837.15	Col5a1	-0.61358	0.0482637	0.332324	-0.546171	0.0730156	0.532308
ENSMUSG00000040296.15	Ddx58	0.718208	0.0485041	0.333254	0.289022	0.39372	0.779563
ENSMUSG00000050671.12	Ism2	-0.880099	0.0486606	0.333294	0.069305	0.844761	0.957884
ENSMUSG00000087196.1	Gm13373	1.35111	0.0486688	0.333294	-0.388029	0.592754	0.870027
ENSMUSG00000037708.16	Spag6	-1.31802	0.0488161	0.333366	-0.117317	0.822699	0.951051
ENSMUSG00000027219.13	Slc28a2	1.31447	0.0489203	0.333384	0.319395	0.627649	0.887104
ENSMUSG00000104214.1	Gm36638	1.3747	0.0490476	0.33374	0.25664	0.708476	0.913986
ENSMUSG00000097660.1	Gm26762	1.15108	0.0491813	0.334153	0.44647	0.429546	0.796477
ENSMUSG00000059305.12	Vpreb1	1.24379	0.0496084	0.335761	0.533188	0.384832	0.774302
ENSMUSG00000108176.1	Gm43965	0.767962	0.0497855	0.336154	0.500218	0.184205	0.650535
ENSMUSG00000016262.14	Sertad4	-0.721906	0.0498208	0.336154	-0.0339168	0.916812	0.978757
ENSMUSG00000105699.1	Gm43703	-1.05186	0.0499414	0.336676	-0.302065	0.496411	0.827992
ENSMUSG00000029082.17	Bst1	0.68314	0.0499536	0.336676	-0.00631913	0.984754	0.997189

## Sheet: Table S4
Table S4 GO term analysis of regorafenib-specific responsive genes in orthotopic HCC tumor (related to Figure 2C)
ID	GeneRatio	BgRatio	p-value	adj. p-value	UP-reg. genes	DN-reg. genes
GO_RESPONSE_TO_VIRUS	34/473	315/14857	4.7548e-10	1.34051e-06	Irf9/Hyal1/Cd40/Dhx58/Ccl4/Rsad2/Rnase6/Tmem173/Tnf/Fosl1/Ifitm3/Il2ra/Ifih1/Fgr/Oas3/Oas2/Nlrp3/Rtp4/Ifit1/Ccl5/Slfn8/Ifi44l/Isg20/Ifi203/Ddx58/Ifit2/Ifnb1/Oas1g/Trim6/Ifi204/Mndal	Adarb1/Bcl2l11/Spon2
GO_DEFENSE_RESPONSE_TO_OTHER_ORGANISM	40/473	424/14857	7.85993e-10	1.34051e-06	Cfp/Irf9/Epha2/Cd40/Dhx58/Rsad2/Rnase6/Tmem173/Tnf/Ifitm3/Il2ra/Ifih1/Tnfsf8/Fgr/Clec4e/Oas3/Oas2/Nlrp3/Rtp4/Ifit1/Slfn8/Vgf/Ifi44l/Isg20/Ifi203/Ddx58/Ifit2/Ifnb1/Klk1/Oas1g/Trim6/Ifi204/Clec7a/Mndal	Adarb1/Il6ra/Plac8/P2rx7/Spon2/Nlrc4
GO_INTERFERON_GAMMA_MEDIATED_SIGNALING_PATHWAY	17/473	88/14857	2.03271e-09	2.31119e-06	Irf9/Cd44/Fcgr1/Nmi/Trim21/Oas3/Oas2/Parp14/Icam1/Socs1/Camk2b/Oas1g/Gm8909/H2-Q6/Gm11127/H2-Q1	Trim68
GO_DEFENSE_RESPONSE_TO_VIRUS	27/473	224/14857	2.80877e-09	2.39518e-06	Irf9/Cd40/Dhx58/Rsad2/Rnase6/Tmem173/Ifitm3/Il2ra/Ifih1/Oas3/Oas2/Nlrp3/Rtp4/Ifit1/Slfn8/Ifi44l/Isg20/Ifi203/Ddx58/Ifit2/Ifnb1/Oas1g/Trim6/Ifi204/Mndal	Adarb1/Spon2
GO_NEGATIVE_REGULATION_OF_VIRAL_PROCESS	17/473	95/14857	6.92254e-09	4.72256e-06	Ccl4/Rsad2/Tnf/Ifitm3/Trim21/Oas3/Ccl5/Isg20/Ifi203/Ifnb1/Jun/Oas1g/Trim6/Ifi204/Mndal	Tfap4/Inpp5k
GO_NEGATIVE_REGULATION_OF_MULTI_ORGANISM_PROCESS	22/473	163/14857	1.05098e-08	5.97483e-06	Calr/Dhx58/Ccl4/Rsad2/Tnf/Ifitm3/Il2ra/Trim21/Trib1/Oas3/Ccl5/Isg20/Ifi203/Ifnb1/Jun/Oas1g/Trim6/Ifi204/Mndal	Tfap4/Inpp5k/Ada
GO_RESPONSE_TO_TYPE_I_INTERFERON	17/473	100/14857	1.55003e-08	7.55309e-06	Irf9/Ptpn6/Rsad2/Ifitm3/Usp18/Oas3/Oas2/Isg20/Xaf1/Ifit2/Ifnb1/Oas1g/Trim6/Gm8909/H2-Q6/Gm11127/H2-Q1
GO_NEGATIVE_REGULATION_OF_VIRAL_GENOME_REPLICATION	13/473	59/14857	3.11384e-08	1.32766e-05	Rsad2/Tnf/Ifitm3/Oas3/Ccl5/Isg20/Ifi203/Ifnb1/Oas1g/Trim6/Ifi204/Mndal	Inpp5k
GO_REGULATION_OF_VIRAL_GENOME_REPLICATION	14/473	93/14857	1.34588e-06	0.00051009	Rsad2/Tnf/Ifitm3/Oas3/Ccl5/Isg20/Ifi203/Ifnb1/Oas1g/Trim6/Ifi204/Mndal	Inpp5k/Adarb1
GO_EXTRACELLULAR_STRUCTURE_ORGANIZATION	32/473	398/14857	1.52641e-06	0.000520658	Cd44/Hyal1/Itga2/Lcp1/Tnf/Loxl4/Nfkb2/Adam8/Lamc2/Pdpn/Adamts9/Itgal/Icam1/Adamts14/Mpzl3	Mmp11/Ddr1/Adamts4/Timp2/Mmp28/Vcan/Rgcc/Pla2g7/Fn1/Col5a1/Fbn1/Creb3l1/Postn/Comp/Col10a1/Adam12/Chadl
GO_RESPONSE_TO_INTERFERON_GAMMA	21/473	201/14857	1.80123e-06	0.000558545	Irf9/Cd44/Fcgr1/Cd40/Ccl4/Ifitm3/Nmi/Trim21/Oas3/Oas2/Parp14/Ccl5/Icam1/Socs1/Camk2b/Oas1g/Gm8909/H2-Q6/Gm11127/H2-Q1	Trim68
GO_REGULATION_OF_ADAPTIVE_IMMUNE_RESPONSE	18/473	164/14857	4.90654e-06	0.0012874	Ptpn6/Cd40/Rsad2/Samsn1/Parp3/Tnf/Nlrp3/Nfkbid/Ifnb1/Gm8909/H2-Q6/Gm11127/H2-Q1	Hfe/Ada/Il6ra/P2rx7/Trpm4
GO_VIRAL_GENOME_REPLICATION	14/473	119/14857	2.52246e-05	0.00537756	Rsad2/Tnf/Ifitm3/Oas3/Ccl5/Isg20/Ifi203/Ifnb1/Oas1g/Trim6/Ifi204/Mndal	Inpp5k/Adarb1
GO_RESPONSE_TO_TOPOLOGICALLY_INCORRECT_PROTEIN	18/473	188/14857	3.22655e-05	0.00647398	Calr/Dnajb9/Hsp90b1/Xbp1/Hsp90aa1/Syvn1/Hspa4l/Dnajb2/Dnaja1/Hsph1/Hspb8	Bok/Creb3l1/Bcl2l11/Comp/Wipi1/Crebrf/Ctdsp2
GO_REGULATION_OF_MULTI_ORGANISM_PROCESS	28/473	381/14857	3.6058e-05	0.00658474	Calr/Dhx58/Ccl4/Rsad2/Tmem173/Tnf/Ifitm3/Il2ra/Trim21/Trib1/Oas3/Ccl5/Isg20/Ifi203/Ddx58/Ifnb1/Jun/Oas1g/Trim6/Ifi204/Mndal	Tfap4/Inpp5k/Ada/Adarb1/Cacna1h/Bcl2l11/P2rx7
GO_REGULATION_OF_VIRAL_LIFE_CYCLE	15/473	139/14857	3.66784e-05	0.00658474	Rsad2/Tnf/Ifitm3/Trim21/Oas3/Ccl5/Isg20/Ifi203/Ifnb1/Oas1g/Trim6/Ifi204/Mndal	Inpp5k/Adarb1
GO_REGULATION_OF_T_CELL_MEDIATED_IMMUNITY	10/473	68/14857	5.39965e-05	0.0092091	Rsad2/Nlrp3/Ifnb1/Gm8909/H2-Q6/Gm11127/H2-Q1	Hfe/P2rx7/Trpm4
GO_RESPONSE_TO_ORGANOPHOSPHORUS	14/473	133/14857	8.70425e-05	0.0141382	Hsp90b1/Fosl1/Sell/Vgf/Jun/Ldha	Inpp5k/P2rx6/Wnt10b/P2rx7/Nox4/Eef2k/P2ry12/Trpm4
GO_REGULATION_OF_LYMPHOCYTE_MEDIATED_IMMUNITY	14/473	135/14857	0.000102349	0.0152359	Ptpn6/Cd40/Rsad2/Parp3/Tnf/Nlrp3/Ifnb1/Gm8909/H2-Q6/Gm11127/H2-Q1	Hfe/P2rx7/Trpm4
GO_REGULATION_OF_SYMBIOSIS_ENCOMPASSING_MUTUALISM_THROUGH_PARASITISM	19/473	224/14857	0.000102734	0.0152359	Ccl4/Rsad2/Tnf/Ifitm3/Trim21/Oas3/Ccl5/Isg20/Ifi203/Ifnb1/Jun/Oas1g/Trim6/Ifi204/Mndal	Tfap4/Inpp5k/Adarb1/Bcl2l11
GO_REGULATION_OF_INNATE_IMMUNE_RESPONSE	28/473	406/14857	0.00010897	0.0154874	Ptpn6/Dhx58/Hsp90b1/Map2k6/Rsad2/Tmem173/Adam8/Ifih1/Nmi/Lrp8/Fgr/Smpdl3b/Ereg/Usp18/Clec4e/Psmb10/Parp14/Ccl5/Socs1/Ifi203/Ddx58/Ifnb1/Trim6/Ifi204/Clec7a/Gm11127/Mndal	Nlrc4
GO_T_CELL_ACTIVATION	30/473	452/14857	0.000123728	0.0168815	Ptpn6/Cd44/Xbp1/Rsad2/Lcp1/Adam8/Il2ra/Tnfsf8/Hsph1/Clec4e/Itgal/Psmb10/Nlrp3/Tespa1/Ccl5/Nfkbid/Icam1/Socs1/Ifnb1/Btla/Tarm1/Treml2/Clec7a	Hfe/Ada/Il6ra/Ppp3ca/P2rx7/Il1rl2/Mafb
GO_VIRAL_LIFE_CYCLE	23/473	311/14857	0.000161885	0.0212381	Epha2/Hyal1/Itga2/Rsad2/Tnf/Ifitm3/Clec5a/Nup210/Trim21/Ldlr/Oas3/Ccl5/Icam1/Isg20/Ifi203/Ifnb1/Oas1g/Trim6/Ifi204/Mndal	Inpp5k/Adarb1/Wwp2
GO_REGULATION_OF_CYTOKINE_PRODUCTION_INVOLVED_IN_IMMUNE_RESPONSE	10/473	78/14857	0.000175977	0.0222317	Rsad2/Tnf/Nlrp3/Ddx58/Ifnb1/Trim6/Gm11127	Hfe/Spon2/Trpm4
GO_NEGATIVE_REGULATION_OF_IMMUNE_SYSTEM_PROCESS	29/473	442/14857	0.00019475	0.0222687	Ptpn6/Dhx58/Samsn1/Parp3/Tnf/Il2ra/Nmi/Smpdl3b/Ubash3b/Ldlr/Trib1/Parp14/Nfkbid/Socs1/Ifi203/Ifnb1/Tarm1/Ifi204/Gm11127/Mndal	Hfe/Ada/Mmp28/Ldb1/Fbn1/Pias3/Hoxa5/C5ar2/Mafb
GO_POSITIVE_REGULATION_OF_INTERLEUKIN_6_PRODUCTION	10/473	79/14857	0.000195855	0.0222687	Xbp1/Tnf/Ifih1/Il1rn/Ereg/Ddx58	Il6ra/P2rx7/Spon2/Il1rl2
GO_NEGATIVE_REGULATION_OF_IMMUNE_RESPONSE	14/473	145/14857	0.000219112	0.0224449	Ptpn6/Dhx58/Samsn1/Parp3/Tnf/Il2ra/Nmi/Parp14/Ifi203/Ifnb1/Ifi204/Gm11127/Mndal	Hfe
GO_REGULATION_OF_CELLULAR_PROTEIN_CATABOLIC_PROCESS	19/473	238/14857	0.000226361	0.0224449	Hsp90aa1/Dnajb2/Map1a/Plk3/Ldlr/Trib1/Nudt15/Bag2	Cbfa2t3/Hfe/Wnt10b/Ophn1/Atp13a2/Mylip/Mgat3/Bag5/Taf9/Rpl23/Klhl40
GO_T_CELL_MEDIATED_IMMUNITY	11/473	96/14857	0.000233196	0.0224449	Rsad2/Nlrp3/Icam1/Ifnb1/Gm8909/H2-Q6/Gm11127/H2-Q1	Hfe/P2rx7/Trpm4
GO_REGULATION_OF_PROTEIN_CATABOLIC_PROCESS	25/473	361/14857	0.000236885	0.0224449	Hsp90aa1/Tnf/Adam8/Dnajb2/Map1a/Plk3/Ldlr/Trib1/Nudt15/Bag2	Cbfa2t3/Hfe/Timp2/Fbxl20/Wnt10b/Ophn1/Wwp2/Snx33/Atp13a2/Mylip/Mgat3/Bag5/Taf9/Rpl23/Klhl40
GO_REGULATION_OF_LEUKOCYTE_MEDIATED_IMMUNITY	16/473	183/14857	0.000252672	0.0230527	Ptpn6/Cd40/Rsad2/Parp3/Tnf/Fgr/Nlrp3/Ddx58/Ifnb1/Gm8909/H2-Q6/Gm11127/H2-Q1	Hfe/P2rx7/Trpm4
GO_PEPTIDYL_TYROSINE_MODIFICATION	24/473	343/14857	0.000269881	0.0234316	Ptpn6/Cd44/Epha2/Cd40/Map2k6/Samsn1/Tnf/Lrp8/Fgr/Bst1/Ereg/Lif/Parp14/Ccl5/Icam1/Socs1/Srcin1	Dyrk1b/Ddr1/Crlf1/Pdgfrb/Il6ra/Nox4/Musk
GO_POSITIVE_REGULATION_OF_ADAPTIVE_IMMUNE_RESPONSE	12/473	114/14857	0.000274777	0.0234316	Cd40/Rsad2/Tnf/Nlrp3/Nfkbid/Gm8909/H2-Q6/Gm11127/H2-Q1	Ada/Il6ra/P2rx7
GO_RESPONSE_TO_PURINE_CONTAINING_COMPOUND	14/473	149/14857	0.000290924	0.0242035	Hsp90b1/Fosl1/Sell/Vgf/Jun/Ldha	Inpp5k/P2rx6/Wnt10b/P2rx7/Nox4/Eef2k/P2ry12/Trpm4
GO_POSITIVE_REGULATION_OF_CYTOKINE_PRODUCTION	28/473	433/14857	0.000316837	0.0250705	Cd40/Dhx58/Xbp1/Rsad2/Tmem173/Tnf/Nfkb2/Adam8/Ifih1/Il1rn/Fgr/Ereg/Clec5a/Clec4e/Nlrp3/Ifi203/Ddx58/Trim6/Ifi204/Gm11127/Mndal	Rgcc/Postn/Il6ra/P2rx7/Spon2/Zfp580/Il1rl2
GO_REGULATION_OF_PRODUCTION_OF_MOLECULAR_MEDIATOR_OF_IMMUNE_RESPONSE	13/473	133/14857	0.000323395	0.0250705	Cd40/Xbp1/Rsad2/Parp3/Tnf/Nlrp3/Ddx58/Ifnb1/Trim6/Gm11127	Hfe/Spon2/Trpm4
GO_LEUKOCYTE_CELL_CELL_ADHESION	23/473	329/14857	0.000364674	0.0276423	Ptpn6/Cd44/Xbp1/Tnf/Adam8/Sell/Il2ra/Hsph1/Itgal/Nt5e/Nlrp3/Tespa1/Ccl5/Nfkbid/Icam1/Socs1/Ifnb1/Btla/Tarm1	Hfe/Ada/Il6ra/Il1rl2
GO_POSITIVE_REGULATION_OF_DNA_BINDING_TRANSCRIPTION_FACTOR_ACTIVITY	19/473	250/14857	0.000420993	0.0301784	Cd40/Tmem173/Tnf/Fosl1/Nfkb2/Adam8/Traf1/Lrp8/Trim21/Nlrp3/Icam1/Ddx58	Crtc1/Rgcc/Wnt10b/Ppp3ca/Nlrc4/Fzd2/Sphk1
GO_REGULATION_OF_IMMUNE_EFFECTOR_PROCESS	25/473	376/14857	0.000436515	0.0301784	Cfp/Ptpn6/Cd40/Dhx58/Xbp1/Rsad2/Parp3/Tmem173/Tnf/Il2ra/Fgr/Nlrp3/Nfkbid/Ddx58/Ifnb1/Trim6/Gm8909/H2-Q6/Gm11127/H2-Q1	Hfe/P2rx7/Spon2/Trpm4/C5ar2
GO_REGULATION_OF_LEUKOCYTE_DIFFERENTIATION	20/473	271/14857	0.000437922	0.0301784	Ptpn6/Xbp1/Tnf/Adam8/Il2ra/Ubash3b/Trib1/Nlrp3/Lif/Tespa1/Nfkbid/Socs1/Ifnb1/Jun	Ada/Fbn1/Rassf2/Pias3/Il1rl2/Mafb
GO_ADAPTIVE_IMMUNE_RESPONSE_BASED_ON_SOMATIC_RECOMBINATION_OF_IMMUNE_RECEPTORS_BUILT_FROM_IMMUNOGLOBULIN_SUPERFAMILY_DOMAINS	19/473	251/14857	0.000442369	0.0301784	Ptpn6/Cd40/Rsad2/Parp3/Tnf/Nfkb2/Nlrp3/Nfkbid/Icam1/Ifnb1/Gm8909/H2-Q6/Gm11127/H2-Q1	Hfe/Ada/Il6ra/P2rx7/Trpm4
GO_CYTOKINE_SECRETION	16/473	195/14857	0.000514331	0.0337382	Xbp1/Tnf/Ifih1/Fgr/Clec5a/Clec4e/Nlrp3/Socs1/Ddx58/Trim6	Rgcc/Fn1/Postn/P2rx7/Nlrc4/C5ar2
GO_REGULATION_OF_PEPTIDE_SECRETION	28/473	447/14857	0.000526015	0.0338535	Cd40/Xbp1/Rsad2/Rhbdf2/Tnf/Ankrd1/Adam8/Ifih1/Fgr/Clec5a/Clec4e/Nlrp3/Ccl5/Socs1/Srcin1/Ddx58/Trim6	Hfe/Rgcc/Fn1/Pfkfb2/Postn/Ppp3ca/P2rx7/Atp13a2/Trpm4/Irs1/C5ar2
GO_REGULATION_OF_RESPONSE_TO_CYTOKINE_STIMULUS	14/473	159/14857	0.000563963	0.034976	Ptpn6/Tnf/Traf1/Ifih1/Il1rn/Usp18/Parp14/Ccl5/Socs1/Ddx58/Trim6	Crebrf/Taf9/Sphk1
GO_PRODUCTION_OF_MOLECULAR_MEDIATOR_OF_IMMUNE_RESPONSE	16/473	197/14857	0.000575225	0.0350373	Dnajb9/Cd40/Xbp1/Rsad2/Parp3/Tnf/Nlrp3/Ddx58/Ifnb1/Vpreb1/Klk1/Trim6/Gm11127	Hfe/Spon2/Trpm4
GO_POSITIVE_REGULATION_OF_CYTOKINE_SECRETION	12/473	126/14857	0.000687364	0.0399744	Xbp1/Tnf/Ifih1/Fgr/Clec5a/Clec4e/Nlrp3/Ddx58/Trim6	Rgcc/Postn/P2rx7
GO_POSITIVE_REGULATION_OF_LEUKOCYTE_CELL_CELL_ADHESION	17/473	220/14857	0.000691437	0.0399744	Ptpn6/Cd44/Xbp1/Tnf/Adam8/Il2ra/Hsph1/Nlrp3/Tespa1/Ccl5/Nfkbid/Icam1/Socs1/Btla	Ada/Il6ra/Il1rl2
GO_INTERLEUKIN_6_PRODUCTION	12/473	129/14857	0.000847744	0.0451864	Ptpn6/Xbp1/Tnf/Ifih1/Il1rn/Ereg/Ddx58	Il6ra/P2rx7/Spon2/Il1rl2/C5ar2
GO_POSITIVE_REGULATION_OF_HEMOPOIESIS	15/473	185/14857	0.000861071	0.0451864	Scin/Xbp1/Tnf/Adam8/Il2ra/Trib1/Nlrp3/Lif/Tespa1/Nfkbid/Socs1/Jun	Ada/Hoxa5/Il1rl2
GO_REGULATION_OF_LEUKOCYTE_MIGRATION	15/473	185/14857	0.000861071	0.0451864	Calr/Itga2/Ccl4/Tnf/Adam8/Bst1/Ccl5/Icam1	Ada/Mmp28/Pla2g7/Il6ra/P2ry12/Zfp580/C5ar2
GO_LEUKOCYTE_MIGRATION	25/473	395/14857	0.000891489	0.0460738	Calr/Ptpn6/Cd44/Itga2/Ccl4/Tnf/Adam8/Sell/Il1rn/Bst1/Itgal/L1cam/Ccl5/Icam1/Vpreb1	Ada/Mmp28/Pla2g7/Fn1/Il6ra/Gpc1/P2ry12/Trpm4/Zfp580/C5ar2
GO_CELLULAR_RESPONSE_TO_EXTRACELLULAR_STIMULUS	19/473	267/14857	0.000936842	0.0473373	Hsp90b1/Upp1/Xbp1/Cdkn1a/Fosl1/Nudt15/Icam1/Ifi203/Jun/Ifi204/Mndal	Hfe/Nprl3/Postn/P2rx7/P2ry12/Trpm4/Sesn1/Wipi1
GO_CYTOKINE_PRODUCTION_INVOLVED_IN_IMMUNE_RESPONSE	10/473	96/14857	0.000948669	0.0473373	Rsad2/Tnf/Nlrp3/Ddx58/Ifnb1/Trim6/Gm11127	Hfe/Spon2/Trpm4
GO_POSITIVE_REGULATION_OF_CELL_ADHESION	25/473	397/14857	0.00095757	0.0473373	Calr/Ptpn6/Cd44/Hyal1/Itga2/Xbp1/Tnf/Adam8/Il2ra/Pdpn/Hsph1/Nlrp3/Tespa1/Ccl5/Nfkbid/Icam1/Socs1/Btla	Ada/Ldb1/Fn1/Il6ra/Ppp3ca/P2ry12/Il1rl2
GO_POSITIVE_REGULATION_OF_LEUKOCYTE_DIFFERENTIATION	13/473	150/14857	0.00101791	0.0483284	Xbp1/Tnf/Adam8/Il2ra/Trib1/Nlrp3/Lif/Tespa1/Nfkbid/Socs1/Jun	Ada/Il1rl2
GO_ENDOPLASMIC_RETICULUM_UNFOLDED_PROTEIN_RESPONSE	11/473	114/14857	0.00102012	0.0483284	Calr/Dnajb9/Hsp90b1/Xbp1/Syvn1	Bok/Creb3l1/Bcl2l11/Wipi1/Crebrf/Ctdsp2
GO_CELLULAR_RESPONSE_TO_EXTERNAL_STIMULUS	22/473	334/14857	0.00107037	0.0487395	Itga2/Cd40/Hsp90b1/Upp1/Xbp1/Cdkn1a/Ankrd1/Fosl1/Nudt15/Icam1/Ifi203/Jun/Ifi204/Mndal	Hfe/Nprl3/Postn/P2rx7/P2ry12/Trpm4/Sesn1/Wipi1
GO_RESPONSE_TO_TEMPERATURE_STIMULUS	17/473	229/14857	0.00107999	0.0487395	Chordc1/Hsp90aa1/Cdkn1a/Dnaja1/Hsph1/Nup210/St8sia1/Fkbp4/Acot11/Vgf/Metrnl/Hspb8/Bag2/Camk2b	Plac8/Cirbp/Bag5
GO_POSITIVE_REGULATION_OF_IMMUNE_EFFECTOR_PROCESS	16/473	209/14857	0.00108596	0.0487395	Cd40/Dhx58/Xbp1/Rsad2/Tnf/Fgr/Nlrp3/Nfkbid/Ddx58/Trim6/Gm8909/H2-Q6/Gm11127/H2-Q1	P2rx7/Spon2
GO_CONNECTIVE_TISSUE_DEVELOPMENT	18/473	254/14857	0.00132501	0.0562336	Scin/Cd44/Hyal1/Xbp1	Wnt9a/Dyrk1b/Wnt10b/Pdgfrb/Col5a1/Il6ra/Bbs2/Comp/Scara3/Chst11/Hoxa5/Trpm4/Adamts12/Chadl
GO_REGULATION_OF_PEPTIDYL_TYROSINE_PHOSPHORYLATION	17/473	234/14857	0.0013668	0.0562336	Ptpn6/Cd44/Cd40/Samsn1/Tnf/Lrp8/Bst1/Ereg/Lif/Parp14/Ccl5/Icam1/Socs1/Srcin1	Crlf1/Il6ra/Nox4
GO_REGULATION_OF_INTRINSIC_APOPTOTIC_SIGNALING_PATHWAY	13/473	155/14857	0.00137523	0.0562336	Cd44/Sod2/Xbp1/Syvn1/Dnaja1/Rnf183	Bok/Creb3l1/Bcl2l11/Bmf/Bag5/Taf9/Plekhf1
GO_POSITIVE_REGULATION_OF_CELL_CELL_ADHESION	18/473	255/14857	0.00138482	0.0562336	Ptpn6/Cd44/Xbp1/Tnf/Adam8/Il2ra/Pdpn/Hsph1/Nlrp3/Tespa1/Ccl5/Nfkbid/Icam1/Socs1/Btla	Ada/Il6ra/Il1rl2
GO_DEFENSE_RESPONSE_TO_BACTERIUM	15/473	195/14857	0.00146566	0.0586193	Cfp/Epha2/Rnase6/Tnf/Tnfsf8/Fgr/Clec4e/Nlrp3/Vgf/Klk1	Il6ra/Plac8/P2rx7/Spon2/Nlrc4
GO_REGULATION_OF_CELL_CELL_ADHESION	24/473	387/14857	0.00147794	0.0586193	Ptpn6/Cd44/Xbp1/Tnf/Adam8/Il2ra/Il1rn/Pdpn/Hsph1/Ubash3b/Nlrp3/Tespa1/Ccl5/Nfkbid/Icam1/Socs1/Ifnb1/Btla/Tarm1	Hfe/Ada/Rgcc/Il6ra/Il1rl2
GO_POSITIVE_REGULATION_OF_CELL_ACTIVATION	21/473	322/14857	0.00155837	0.0604045	Ptpn6/Cd40/Plek/Xbp1/Adam8/Il2ra/Pdpn/Fgr/Bst1/Hsph1/Nlrp3/Tespa1/Ccl5/Nfkbid/Socs1/Btla/Gm11127	Ada/Pdgfrb/Il6ra/Il1rl2
GO_POSITIVE_REGULATION_OF_DEFENSE_RESPONSE	27/473	459/14857	0.00166259	0.0637201	Itga2/Dhx58/Hsp90b1/Map2k6/Rsad2/Tmem173/Tnf/Adam8/Ifih1/Smpdl3b/Ereg/Clec4e/Psmb10/Ldlr/Ccl5/Ifi203/Ddx58/Ifnb1/Trim6/Ifi204/Clec7a/Gm11127/Mndal	Pla2g7/Cdk19/Nlrc4/Mgst2
GO_NEGATIVE_REGULATION_OF_ESTABLISHMENT_OF_PROTEIN_LOCALIZATION	13/473	160/14857	0.00183119	0.0686395	Rsad2/Rhbdf2/Tnf/Dnaja1/Nlrp3/Srcin1	Inpp5k/Rgcc/Fn1/Ppp3ca/Wwp2/Irs1/C5ar2
GO_REGULATION_OF_DNA_BINDING_TRANSCRIPTION_FACTOR_ACTIVITY	24/473	395/14857	0.00193917	0.0717674	Cd40/Nfkbie/Tmem173/Tnf/Fosl1/Nfkb2/Adam8/Traf1/Lrp8/Trim21/Trib1/Nlrp3/Nfkbid/Icam1/Ddx58/Jun	Crtc1/Rgcc/Wnt10b/Ppp3ca/Wwp2/Nlrc4/Fzd2/Sphk1
GO_POSITIVE_REGULATION_OF_LEUKOCYTE_MEDIATED_IMMUNITY	11/473	124/14857	0.00201984	0.0717674	Cd40/Rsad2/Tnf/Fgr/Nlrp3/Ddx58/Gm8909/H2-Q6/Gm11127/H2-Q1	P2rx7
GO_CELLULAR_RESPONSE_TO_HEAT	11/473	125/14857	0.00215299	0.073141	Chordc1/Hsp90aa1/Cdkn1a/Hsph1/Nup210/St8sia1/Fkbp4/Hspb8/Bag2/Camk2b	Bag5
GO_VIRAL_GENE_EXPRESSION	14/473	183/14857	0.00219194	0.073141	Ccl4/Ifitm3/Nup210/Trim21/Ccl5/Jun	Tfap4/Inpp5k/Rps26/Eif3f/Rpl12/Rpl18a/Rpl35/Rpl23
GO_POSITIVE_REGULATION_OF_PEPTIDE_SECRETION	18/473	266/14857	0.0022086	0.073141	Xbp1/Tnf/Ankrd1/Adam8/Ifih1/Fgr/Clec5a/Clec4e/Nlrp3/Ddx58/Trim6	Hfe/Rgcc/Pfkfb2/Postn/P2rx7/Atp13a2/Trpm4
GO_INTRINSIC_APOPTOTIC_SIGNALING_PATHWAY	19/473	289/14857	0.00233924	0.0760066	Cd44/Epha2/Sod2/Xbp1/Cdkn1a/Tnf/Syvn1/Dnaja1/Ifi203/Rnf183/Ifi204/Mndal	Bok/Creb3l1/Bcl2l11/Bmf/Bag5/Taf9/Plekhf1
GO_MUSCLE_CELL_PROLIFERATION	14/473	185/14857	0.00242363	0.0772616	Sod2/Itga2/Zfpm2/Cdkn1a/Tnf/Ereg/Tbx20/Trib1/Ccl5/Kcnk2/Jun	Ogn/Pdgfrb/Il6ra
GO_ADAPTIVE_IMMUNE_RESPONSE	23/473	380/14857	0.0025068	0.079173	Ptpn6/Cd40/Rsad2/Alcam/Samsn1/Parp3/Tnf/Nfkb2/Nlrp3/Nfkbid/Icam1/Ifnb1/Btla/Tarm1/Gm8909/H2-Q6/Gm11127/H2-Q1	Hfe/Ada/Il6ra/P2rx7/Trpm4
GO_POSITIVE_REGULATION_OF_SECRETION	24/473	406/14857	0.0027703	0.0859045	Scin/Xbp1/Map2k6/Tnf/Rab27b/Ankrd1/Adam8/Ifih1/Fgr/Clec5a/Clec4e/Nlrp3/Ddx58/Trim6/Gm11127	Hfe/Rgcc/Rab2b/Cacna1h/Pfkfb2/Postn/P2rx7/Atp13a2/Trpm4
GO_CELLULAR_RESPONSE_TO_TOPOLOGICALLY_INCORRECT_PROTEIN	12/473	150/14857	0.00307376	0.0919336	Calr/Dnajb9/Hsp90b1/Xbp1/Syvn1/Hspb8	Bok/Creb3l1/Bcl2l11/Wipi1/Crebrf/Ctdsp2
GO_POSITIVE_REGULATION_OF_LEUKOCYTE_MIGRATION	11/473	131/14857	0.00310937	0.0919336	Calr/Itga2/Ccl4/Tnf/Adam8/Ccl5/Icam1	Pla2g7/Il6ra/P2ry12/Zfp580
GO_SMOOTH_MUSCLE_CELL_PROLIFERATION	11/473	132/14857	0.00329765	0.0919336	Sod2/Itga2/Cdkn1a/Tnf/Ereg/Trib1/Ccl5/Jun	Ogn/Pdgfrb/Il6ra
GO_RESPONSE_TO_NUTRIENT	15/473	215/14857	0.00375854	0.0993829	Itga2/Cd40/Hsp90b1/Xbp1/Sell/Cubn/Ldha	Nqo1/Ada/P2rx6/Postn/P2rx7/Eef2/P2ry12/Trpm4
GO_POSITIVE_REGULATION_OF_PEPTIDYL_TYROSINE_PHOSPHORYLATION	13/473	174/14857	0.00380821	0.0999215	Cd44/Cd40/Tnf/Lrp8/Ereg/Lif/Parp14/Ccl5/Icam1/Srcin1	Crlf1/Il6ra/Nox4
GO_LYMPHOCYTE_ACTIVATION_INVOLVED_IN_IMMUNE_RESPONSE	13/473	176/14857	0.00419589	0.101505	Cd40/Xbp1/Lcp1/Parp3/Cdh17/Clec4e/Itgal/Nlrp3/Nfkbid/Icam1/Ifnb1/Gm11127	Ada
GO_NEGATIVE_REGULATION_OF_TRANSFERASE_ACTIVITY	17/473	263/14857	0.00460311	0.104915	Chordc1/Ptpn6/Cdkn1a/Parp3/Dnaja1/Ubash3b/Trib1/Socs1/Srcin1/Bag2	Tfap4/Inpp5k/Gadd45b/Adarb1/Pik3ip1/Bag5/Rpl23
GO_REGULATION_OF_PROTEASOMAL_PROTEIN_CATABOLIC_PROCESS	13/473	178/14857	0.00461483	0.104915	Dnajb2/Map1a/Plk3/Trib1/Nudt15/Bag2	Cbfa2t3/Hfe/Wnt10b/Ophn1/Bag5/Taf9/Klhl40
GO_NEGATIVE_REGULATION_OF_PEPTIDE_SECRETION	10/473	119/14857	0.00469132	0.104915	Rsad2/Rhbdf2/Tnf/Nlrp3/Srcin1	Rgcc/Fn1/Ppp3ca/Irs1/C5ar2
GO_REGULATION_OF_PROTEASOMAL_UBIQUITIN_DEPENDENT_PROTEIN_CATABOLIC_PROCESS	10/473	119/14857	0.00469132	0.104915	Dnajb2/Map1a/Plk3/Trib1	Cbfa2t3/Hfe/Wnt10b/Bag5/Taf9/Klhl40
GO_POSITIVE_REGULATION_OF_CATABOLIC_PROCESS	23/473	400/14857	0.00470593	0.104915	Hsp90aa1/Tnf/Adam8/Dnajb2/Plk3/Trim21/Ldlr/Trib1/Hspb8/Bag2/Nanos1	Cbfa2t3/Pfkfb2/Gpsm1/Bcl2l11/P2rx7/Wwp2/Snx33/Mylip/Sesn1/Irs1/Klhl40/Plekhf1
GO_MYELOID_LEUKOCYTE_DIFFERENTIATION	15/473	221/14857	0.00484794	0.107379	Epha2/Tnf/Fam20c/Ubash3b/Trib1/Lif/Ifi203/Jun/Ifi204/Mndal	Cbfa2t3/Fbn1/Rassf2/Pias3/Mafb
GO_NEGATIVE_REGULATION_OF_DEFENSE_RESPONSE	14/473	201/14857	0.00510217	0.111561	Dhx58/Il2ra/Nmi/Smpdl3b/Ldlr/Nt5e/Nlrp3/Parp14/Metrnl/Ifi203/Ifi204/Gm11127/Mndal	Ada
GO_NEGATIVE_REGULATION_OF_BINDING	12/473	161/14857	0.00543012	0.114319	Dnajb2/Ifi203/Bag2/Ifit2/Jun/Ifi204/Mndal	Tfap4/Hfe/Arhgap28/Gpsm1/Ppp3ca
GO_REGULATION_OF_INFLAMMATORY_RESPONSE	19/473	313/14857	0.00556346	0.114319	Itga2/Tmem173/Tnf/Adam8/Il2ra/Smpdl3b/Bst1/Usp18/Ldlr/Nt5e/Nlrp3/Ccl5/Metrnl	Ada/Pla2g7/Cdk19/Adamts12/Il1rl2/Mgst2
GO_POSITIVE_REGULATION_OF_LYMPHOCYTE_ACTIVATION	17/473	269/14857	0.00574949	0.115593	Ptpn6/Cd40/Xbp1/Adam8/Il2ra/Bst1/Hsph1/Nlrp3/Tespa1/Ccl5/Nfkbid/Socs1/Btla/Gm11127	Ada/Il6ra/Il1rl2
GO_NEGATIVE_REGULATION_OF_PROTEIN_CATABOLIC_PROCESS	10/473	123/14857	0.0059151	0.11599	Map1a	Hfe/Timp2/Ophn1/Atp13a2/Mgat3/Bag5/Taf9/Rpl23/Klhl40
GO_REGULATION_OF_UBIQUITIN_DEPENDENT_PROTEIN_CATABOLIC_PROCESS	11/473	143/14857	0.0060352	0.11599	Dnajb2/Map1a/Plk3/Trib1	Cbfa2t3/Hfe/Wnt10b/Bag5/Taf9/Rpl23/Klhl40
GO_REGULATION_OF_APOPTOTIC_SIGNALING_PATHWAY	22/473	385/14857	0.00605104	0.11599	Cd44/Sod2/Xbp1/Tnf/Syvn1/Traf1/Dnaja1/Icam1/Ifnb1/Rnf183	Tfap4/Bok/Creb3l1/Bcl2l11/St18/Bmf/Meis3/Bag5/Taf9/Zfp13/Plekhf1/Srpx
GO_NEGATIVE_REGULATION_OF_SECRETION	14/473	205/14857	0.00605285	0.11599	Rsad2/Rhbdf2/Tnf/Nlrp3/Lif/Srcin1/Gm11127	Ada/Rgcc/Fn1/Ppp3ca/P2ry12/Irs1/C5ar2
GO_LYMPHOCYTE_MEDIATED_IMMUNITY	15/473	227/14857	0.00618089	0.117782	Ptpn6/Cd40/Rsad2/Parp3/Tnf/Nlrp3/Icam1/Ifnb1/Gm8909/H2-Q6/Gm11127/H2-Q1	Hfe/P2rx7/Trpm4
GO_RESPONSE_TO_HEAT	12/473	164/14857	0.00627455	0.118246	Chordc1/Hsp90aa1/Cdkn1a/Dnaja1/Hsph1/Nup210/St8sia1/Fkbp4/Hspb8/Bag2/Camk2b	Bag5
GO_REGULATION_OF_EXOCYTOSIS	14/473	211/14857	0.00774006	0.134701	Hap1/Rab27b/Fgr/Gm11127	Snapin/Mical1/Fbxl20/Rab2b/Cacna1h/Apba1/Cplx2/Vamp1/Atp13a2/Sept5
GO_MYELOID_CELL_DIFFERENTIATION	23/473	418/14857	0.00787976	0.135747	Scin/Ptpn6/Epha2/Slc11a2/Tnf/Fam20c/Clec5a/Ubash3b/Trib1/Lif/Ifi203/Jun/Nbeal2/Ifi204/Mndal	Etv2/Cbfa2t3/Ldb1/Fbn1/Rassf2/Pias3/Hoxa5/Mafb
GO_RESPONSE_TO_MOLECULE_OF_BACTERIAL_ORIGIN	18/473	302/14857	0.00822072	0.140204	Cd40/Xbp1/Tnf/Ankrd1/Nfkb2/Il1rn/Trib1/Nlrp3/Ccl5/Icam1/Jun/Trim6	Ptgfr/P2rx7/Plscr4/Spon2/Cdk19/Mgst2
GO_TYPE_I_INTERFERON_PRODUCTION	10/473	131/14857	0.00909795	0.152873	Dhx58/Tmem173/Nfkb2/Ifih1/Nmi/Trim21/Ifi203/Ddx58/Ifi204/Mndal
GO_CALCIUM_MEDIATED_SIGNALING	13/473	194/14857	0.00931363	0.15497	Hap1/Ccl4/Plek/Tnf/Bst1	Ada/Ptgfr/Ppp3ca/P2rx7/Nfatc1/P2ry12/Trpm4/Sphk1
GO_CELL_MATRIX_ADHESION	14/473	216/14857	0.00941436	0.155885	Cd44/Itga2/Plau/Bst1/Adamts9/Itgal/L1cam	Ddr1/Ldb1/Fn1/Bcl2l11/Postn/Adamts12/Tmem8b
GO_RESPONSE_TO_OXYGEN_LEVELS	21/473	377/14857	0.00951133	0.15673	Itga2/Hsp90b1/Plau/Slc11a2/Cdkn1a/Ankrd1/Adam8/Plk3/Psmb10/Icam1/Kcnk2/Ldha	Cbfa2t3/Ada/Rgcc/Pdgfrb/Postn/Nox4/S100b/Eef2k/Vasn
GO_CELLULAR_RESPONSE_TO_STARVATION	11/473	153/14857	0.00984298	0.160643	Upp1/Xbp1/Cdkn1a/Ifi203/Jun/Ifi204/Mndal	Hfe/Nprl3/Sesn1/Wipi1
GO_POSTSYNAPSE_ORGANIZATION	11/473	153/14857	0.00984298	0.160643	Rapsn/Nrp2/Lrp8/Srcin1/Camk2b	Lrfn1/Ophn1/Dbn1/Eef2k/Musk/Bhlhb9
GO_NEGATIVE_REGULATION_OF_LYMPHOCYTE_ACTIVATION	10/473	133/14857	0.0100676	0.163526	Ptpn6/Samsn1/Parp3/Il2ra/Nfkbid/Socs1/Ifnb1/Tarm1/Gm11127	Hfe
GO_RESPONSE_TO_ENDOPLASMIC_RETICULUM_STRESS	16/473	265/14857	0.0109652	0.171594	Calr/Dnajb9/Hsp90b1/Xbp1/Syvn1/Dnajb2/Jun/Rnf183	Bok/Creb3l1/Bcl2l11/Eef2/Wipi1/Crebrf/Ctdsp2/Srpx
GO_POSITIVE_REGULATION_OF_PROTEOLYSIS	19/473	336/14857	0.0114362	0.174928	Tnf/Adam8/Dnajb2/Plk3/Trib1/Nlrp3/Ifi203/Bag2/Ifi204/Mndal	Tfap4/Cbfa2t3/Fn1/Bok/Bcl2l11/Snx33/St18/Nlrc4/Klhl40
GO_NEGATIVE_REGULATION_OF_CELL_ACTIVATION	12/473	178/14857	0.0116757	0.176154	Ptpn6/Samsn1/Parp3/Il2ra/Ubash3b/Ldlr/Nfkbid/Socs1/Ifnb1/Tarm1/Gm11127	Hfe
GO_REGULATION_OF_METAL_ION_TRANSPORT	19/473	337/14857	0.0117745	0.176154	Ptpn6/Hap1/Ccl4/Glrx/Ubash3b/Ccl5/Icam1/Ramp3/Pkp2/Camk2b	Inpp5k/Hfe/Galr2/Pdgfrb/Snta1/P2rx7/Wwp2/P2ry12/Klhl24
GO_NEGATIVE_REGULATION_OF_PHOSPHORYLATION	22/473	409/14857	0.0118085	0.176154	Chordc1/Ptpn6/Samsn1/Cdkn1a/Dnaja1/Ubash3b/Trib1/Lif/Parp14/Socs1/Srcin1/Jun	Tfap4/Inpp5k/Gadd45b/Mical1/Adarb1/Rassf2/P2rx7/Ptpn13/Pik3ip1/Ctdsp2
GO_REGULATION_OF_LYMPHOCYTE_ACTIVATION	22/473	409/14857	0.0118085	0.176154	Ptpn6/Cd40/Xbp1/Samsn1/Parp3/Adam8/Il2ra/Bst1/Hsph1/Nlrp3/Tespa1/Ccl5/Nfkbid/Socs1/Ifnb1/Btla/Tarm1/Gm11127	Hfe/Ada/Il6ra/Il1rl2
GO_CELLULAR_RESPONSE_TO_BIOTIC_STIMULUS	13/473	202/14857	0.0127664	0.186005	Cd40/Xbp1/Tnf/Ankrd1/Il1rn/Trib1/Nlrp3/Ccl5/Icam1	Bcl2l11/Plscr4/Spon2/Cdk19
GO_REGULATION_OF_T_CELL_DIFFERENTIATION	10/473	138/14857	0.0128356	0.186005	Xbp1/Adam8/Il2ra/Nlrp3/Tespa1/Nfkbid/Socs1/Ifnb1	Ada/Il1rl2
GO_REGULATION_OF_HEMOPOIESIS	24/473	463/14857	0.0133799	0.189373	Scin/Ptpn6/Xbp1/Tnf/Adam8/Il2ra/Psmb10/Ubash3b/Trib1/Nlrp3/Lif/Tespa1/Nfkbid/Socs1/Ifnb1/Jun	Ada/Ldb1/Fbn1/Rassf2/Pias3/Hoxa5/Il1rl2/Mafb
GO_ALPHA_BETA_T_CELL_ACTIVATION	10/473	140/14857	0.01409	0.194693	Rsad2/Tnfsf8/Hsph1/Nlrp3/Nfkbid/Socs1/Tarm1	Hfe/Ada/Il6ra
GO_POSITIVE_REGULATION_OF_CYSTEINE_TYPE_ENDOPEPTIDASE_ACTIVITY	10/473	140/14857	0.01409	0.194693	Tnf/Nlrp3/Ifi203/Ifi204/Mndal	Tfap4/Bok/Bcl2l11/St18/Nlrc4
GO_RESPONSE_TO_REACTIVE_OXYGEN_SPECIES	14/473	227/14857	0.0140983	0.194693	Sod2/Hyal1/Tnf/Fosl1/Plk3/Jun/Ldha	Nqo1/Ada/Pdgfrb/Eef2/Sesn1/Zfp580/Sphk1
GO_POSITIVE_REGULATION_OF_PROTEIN_CATABOLIC_PROCESS	13/473	206/14857	0.0148266	0.202319	Hsp90aa1/Tnf/Adam8/Dnajb2/Plk3/Ldlr/Trib1/Bag2	Cbfa2t3/Wwp2/Snx33/Mylip/Klhl40
GO_NEGATIVE_REGULATION_OF_CELLULAR_CATABOLIC_PROCESS	14/473	229/14857	0.0151153	0.205412	Map1a/Nmnat1/Pkp3	Hfe/Timp2/Ophn1/Atp13a2/Bmf/Mgat3/Cirbp/Bag5/Taf9/Rpl23/Klhl40
GO_SULFUR_COMPOUND_BIOSYNTHETIC_PROCESS	11/473	163/14857	0.0152782	0.205984	St3gal6/Elovl5/Elovl6/B3gnt7	Ogn/Vcan/Acss1/Pdpr/Chst11/Amd2/Mgst2
GO_SKELETAL_SYSTEM_DEVELOPMENT	25/473	496/14857	0.0161412	0.212825	Scin/Ptpn6/Cd44/Epha2/Hyal1/Fam20c/Fgr	Wnt9a/Hoxa10/Adamts4/Vcan/Wnt10b/Rdh10/Fbn1/Rassf2/P2rx7/Bbs2/Comp/Scara3/Chst11/Hoxa5/Col10a1/Adamts12/Acvr2b/Chadl
GO_PROTEIN_KINASE_B_SIGNALING	15/473	254/14857	0.0162316	0.212947	Epha2/Cd40/Hsp90aa1/Tnf/Adam8/Plk3/Ereg/Ccl5/Ramp3	Inpp5k/Pdgfrb/Nox4/P2ry12/Meis3/Irs1
GO_PROTEIN_STABILIZATION	11/473	165/14857	0.0165932	0.216028	Calr/Hsp90aa1/Cdkn1a/Syvn1/Bag2	Wnt10b/Rassf2/Tmem88/Bag5/Taf9/Rpl23
GO_ACTIN_FILAMENT_BUNDLE_ORGANIZATION	10/473	144/14857	0.016871	0.218809	Spire2/Hsp90b1/Plek/Lcp1/Rnd1	Inpp5k/Rgcc/Arhgap28/Nox4/Arhgef15

## Sheet: Table S5
Table S5 GSEA analysis of immune-related pathway in tumor from orthotopic HCC model (related to Figure 2F)
ID	geneset size	Regorafenib vs. Vehicle				DC101 vs. Vehicle
		enrichmentScore (ES)	normalized ES	p-value	core_enrichment	enrichmentScore (ES)	normalized ES	p-value	core_enrichment
M1_macrophage_28117416	16	0.578959	1.67238	0.0189024	Cxcl10/Tnf/Cd14/Fcgr1/Il12a/Stat2/Irf8/Stat1/Cxcl9/Nos2/Il6	0.226311	0.694391	0.887928	Cd14/Tnf/Cxcl10/Fcgr1/Il12a/Fcgr3/Stat1/Il6/Irf1/Stat2/Jak2/Cxcl9/Cd86/Irf8/Ifng/Nos2
IL6_signature_26893580	16	0.756731	2.18589	0.00121951	Ifitm3/C3/Ifitm1/Cfb/Tubb3/Serpina3m/Serpina3k/Serpina3n/Lcn2/Serpina3c/S100a9/S100a8/Ifitm2/Tmc5	0.679806	2.08585	0.000665115	C3/Serpina3m/Lcn2/Serpina3k/Cfb/Serpina3c/Serpina3n/Ifitm3
PID_IL12_2PATHWAY	69	0.408535	1.64932	0.00860585	Map2k6/Il18/Il18rap/Ccl4/Rela/Socs1/Sphk2/H2-Q10/Nfkb2/H2-Q1/Il2rg/B2m/Il2ra/Il1r1/H2-Q6/H2-Q7/Gm8909/Il1b/H2-D1/H2-K1/Il12a/Nfkb1/Il12rb1/Stat1/Stat6/Il12b/Cd4/Ccr5/Il2/H2-Q4/Fos/Relb	-0.306713	-1.08871	0.331187	Ccl4/Ifng/Fasl/Il12rb2/Gm10499/Tbx21/Cd247/H2-Ea-ps/H2-Bl/Stat4/Il18r1/Map2k3/Stat6/Nos2/Stat5a/Gzma/Stat3/Ripk2/Gadd45g/H2-Q2/Eomes/Hlx/Mapk14/Ppp3r1/Atf2/Gadd45b/Ppp3ca
PHONG_TNF_TARGETS_UP	57	0.553946	2.15963	0.000429646	Jun/Nfkbia/Epha2/Plau/Dusp8/Lif/Adamts9/Lamc2/Ldlr/Icam1/Ier5/Ereg/Cxcl1/Nfkb2/Ier3/Cd44/Egr1/Birc2/Birc3/Ifngr2/Zfp36/Ier2/Sdc4/Tnfaip3/Btg3/Inhba/Il11/Fjx1/Egr2/Plk2	0.267241	1.1456	0.202828	Ier2/Nfkbia/Egr1/Lamc2/Dusp8/Ldlr/Junb/Birc2
SANA_RESPONSE_TO_IFNG_UP	66	0.474335	1.90351	0.00128425	Ubd/Mlkl/Il23a/Cxcl10/Lap3/Oas1a/Ceacam1/Oas1g/H2-Q10/Ifi35/Oas2/Rnf213/H2-Q1/Ube2l6/Lgals3bp/Serping1/Ifih1/Ifi44l/H2-Q6/H2-Q7/Gm8909/Cfh/H2-D1/Parp14/H2-K1/Samd9l/H2-T23/Nlrc5	0.209675	0.92556	0.636309	Vamp5/Il23a/Ceacam1/Lap3/Cfh/H2-Q10/Ubd/Ifi35/Oas1a/H2-T23/Ube2l6/Serping1

## Sheet: Table S6
Table S6 GSEA analysis of regorafenib-treated in M2 BMDMs (related to Figure 4A)
ID	geneset size	Regorafenib vs. Vehicle
		enrichmentScore (ES)	normalized ES	p-value	core_enrichment
M1/M2_PMID:26699615	45	0.467818	1.40564	0.0524748	Itgal/Tlr2/Ccrl2/Hp/Pstpip2/Nfkbiz/H2-Q6/Ebi3/Saa3/Aoah/Gpr18/Gngt2/Fpr2/Irak3

## Sheet: Table S7
Table S7 Transcriptomic analysis of regorafenib-responsive genes in BMDMs
M0+Rego vs M0 (related to figure S3A and B)					M1+Rego vs M1 (related to figure S3A and B)					M2+Rego vs M2 (related to figure 4B)
GeneID	GeneName	logFC	Probability of diff. exprs (NOISeq)		GeneID	GeneName	logFC	Probability of diff. exprs (NOISeq)		GeneID	GeneName	logFC	Probability of diff. exprs (NOISeq)
ENSMUSG00000035385.5	Ccl2	-6.31492	0.999636		ENSMUSG00000004296.14	Il12b	1.5313	0.845565		ENSMUSG00000035373.2	Ccl7	-5.85739	0.998623
ENSMUSG00000035373.2	Ccl7	-6.33711	0.999588		ENSMUSG00000031762.7	Mt2	-1.42532	0.842884		ENSMUSG00000035385.5	Ccl2	-5.05447	0.993341
ENSMUSG00000101389.1	Ms4a4a	5.76694	0.996194		ENSMUSG00000026773.19	Pfkfb3	-1.06604	0.806066		ENSMUSG00000025473.16	Adam8	-1.23087	0.846972
ENSMUSG00000002985.16	Apoe	5.05661	0.993502		ENSMUSG00000025151.16	Maged1	-1.13097	0.810029		ENSMUSG00000006932.17	Ctnnb1	1.18532	0.841487
ENSMUSG00000021125.6	Arg2	4.41436	0.973319		ENSMUSG00000031722.10	Hp	-2.05443	0.891053		ENSMUSG00000022108.8	Itm2b	1.00679	0.829061
ENSMUSG00000070348.5	Ccnd1	-4.00247	0.963265		ENSMUSG00000031765.8	Mt1	-1.15021	0.812609		ENSMUSG00000024610.14	Cd74	2.3094	0.906407
ENSMUSG00000020034.7	Tcp11l2	3.72217	0.961484		ENSMUSG00000101389.1	Ms4a4a	-1.42179	0.842572		ENSMUSG00000070348.5	Ccnd1	-2.72753	0.914053
ENSMUSG00000021403.3	Serpinb9b	-3.61708	0.960491		ENSMUSG00000031779.3	Ccl22	2.36772	0.898634		ENSMUSG00000019987.9	Arg1	-3.91625	0.96296
ENSMUSG00000031722.10	Hp	4.43838	0.952157		ENSMUSG00000027776.12	Il12a	1.38968	0.838918		ENSMUSG00000025044.16	Msr1	-1.4304	0.863665
ENSMUSG00000038065.13	Mturn	3.40301	0.948042		ENSMUSG00000099974.1	Bcl2a1d	2.2295	0.892586		ENSMUSG00000064373.12	Selenop	2.25468	0.906393
ENSMUSG00000029810.15	Tmem176b	4.38606	0.939733		ENSMUSG00000017002.14	Slpi	-1.57703	0.871352		ENSMUSG00000046805.9	Mpeg1	1.04178	0.829335
ENSMUSG00000006310.10	Zbtb32	-4.13342	0.923005		ENSMUSG00000056054.9	S100a8	-1.75473	0.873636		ENSMUSG00000061232.15	H2-K1	0.999882	0.829033
ENSMUSG00000038390.11	Gpr162	3.40123	0.922819		ENSMUSG00000024529.13	Lox	-1.31346	0.825315		ENSMUSG00000005413.8	Hmox1	-1.17448	0.840525
ENSMUSG00000064373.12	Selenop	2.87162	0.914572		ENSMUSG00000102037.1	Bcl2a1a	1.56974	0.844565		ENSMUSG00000002944.15	Cd36	-1.79341	0.890885
ENSMUSG00000036322.10	H2-Ea-ps	3.08739	0.914239		ENSMUSG00000037411.10	Serpine1	-1.47539	0.843444		ENSMUSG00000022150.16	Dab2	-1.72071	0.889572
ENSMUSG00000042675.15	Ypel3	2.86746	0.914211		ENSMUSG00000000732.9	Icosl	1.32932	0.835587		ENSMUSG00000028459.11	Cd72	-1.28966	0.849372
ENSMUSG00000073421.5	H2-Ab1	2.96817	0.914095		ENSMUSG00000037706.17	Cd81	1.39939	0.837016		ENSMUSG00000041959.14	S100a10	-0.995349	0.829003
ENSMUSG00000018930.3	Ccl4	-2.92982	0.913929		ENSMUSG00000015947.10	Fcgr1	-1.20226	0.814793		ENSMUSG00000002985.16	Apoe	3.41697	0.962761
ENSMUSG00000001228.14	Uhrf1	-2.9211	0.913688		ENSMUSG00000018500.2	Adora2b	1.09208	0.804654		ENSMUSG00000023067.14	Cdkn1a	-1.48932	0.86574
ENSMUSG00000023349.14	Clec4n	2.80674	0.913515		ENSMUSG00000000184.12	Ccnd2	1.39849	0.836443		ENSMUSG00000028599.10	Tnfrsf1b	1.49058	0.865736
ENSMUSG00000035692.6	Isg15	-2.92068	0.913134		ENSMUSG00000049091.6	Sephs2	1.03346	0.801896		ENSMUSG00000018217.12	Pmp22	-1.0716	0.830409
ENSMUSG00000036594.14	H2-Aa	2.67168	0.912819		ENSMUSG00000031438.11	Rnf128	-1.09727	0.805364		ENSMUSG00000015340.10	Cybb	2.37825	0.911112
ENSMUSG00000003420.8	Fcgrt	2.72294	0.91271		ENSMUSG00000068874.13	Selenbp1	-1.38081	0.835971		ENSMUSG00000036594.14	H2-Aa	2.63738	0.913821
ENSMUSG00000050370.4	Ch25h	-3.64769	0.912674		ENSMUSG00000022707.16	Gbe1	-1.05262	0.801556		ENSMUSG00000098178.1	Gm42418	1.01626	0.828943
ENSMUSG00000062901.3	Klhl24	2.79368	0.912013		ENSMUSG00000030156.5	Cd69	1.06128	0.801596		ENSMUSG00000032725.10	Folr2	-1.15208	0.837188
ENSMUSG00000060586.10	H2-Eb1	2.89126	0.911765		ENSMUSG00000023349.14	Clec4n	-1.06496	0.801167		ENSMUSG00000042129.8	Rassf4	1.88498	0.894589
ENSMUSG00000020649.11	Rrm2	-2.51425	0.910796		ENSMUSG00000050953.10	Gja1	-1.13322	0.80541		ENSMUSG00000022102.13	Dok2	-1.29549	0.849349
ENSMUSG00000022102.13	Dok2	-2.47907	0.910789		ENSMUSG00000007655.16	Cav1	-1.6293	0.866619		ENSMUSG00000047222.7	Rnase2a	2.26662	0.906235
ENSMUSG00000008540.11	Mgst1	2.5254	0.9107		ENSMUSG00000026984.4	Il1f6	-1.71853	0.867369		ENSMUSG00000001270.9	Ckb	-1.14358	0.83675
ENSMUSG00000028212.16	Ccne2	-2.93687	0.910511		ENSMUSG00000030148.15	Clec4a2	-1.36016	0.831565		ENSMUSG00000061100.4	Retnla	2.33658	0.911032
ENSMUSG00000023913.17	Pla2g7	2.39893	0.910454		ENSMUSG00000059089.4	Fcgr4	-1.44891	0.836309		ENSMUSG00000073421.5	H2-Ab1	2.82599	0.915096
ENSMUSG00000024610.14	Cd74	2.40821	0.910421		ENSMUSG00000031780.2	Ccl17	4.43138	0.971917		ENSMUSG00000040522.5	Tlr8	1.0997	0.83265
ENSMUSG00000025574.13	Tk1	-2.50252	0.910359		ENSMUSG00000032374.14	Plod2	-1.23866	0.812803		ENSMUSG00000071713.6	Csf2rb	1.21204	0.841528
ENSMUSG00000005410.6	Mcm5	-2.57162	0.910356		ENSMUSG00000018819.10	Lsp1	1.52914	0.833255		ENSMUSG00000045382.6	Cxcr4	1.29846	0.849276
ENSMUSG00000026748.13	Plxdc2	2.84631	0.910267		ENSMUSG00000024190.6	Dusp1	-1.22134	0.810464		ENSMUSG00000024672.11	Ms4a7	1.81089	0.893662
ENSMUSG00000028756.12	Pink1	2.59452	0.909939		ENSMUSG00000041782.14	Lad1	1.94357	0.865989		ENSMUSG00000036322.10	H2-Ea-ps	2.98927	0.915053
ENSMUSG00000054510.5	Gm14461	2.74896	0.909931		ENSMUSG00000019987.9	Arg1	-2.77157	0.888354		ENSMUSG00000028238.6	Atp6v0d2	1.11136	0.832679
ENSMUSG00000025993.10	Slc40a1	2.83474	0.909899		ENSMUSG00000018916.5	Csf2	2.85103	0.885301		ENSMUSG00000091957.3	Rps2-ps10	-1.09537	0.832551
ENSMUSG00000048249.14	Crebrf	2.62012	0.90982		ENSMUSG00000000204.16	Slfn4	-1.36975	0.819615		ENSMUSG00000021403.3	Serpinb9b	-1.97577	0.894641
ENSMUSG00000040204.6	Pclaf	-2.48053	0.909797		ENSMUSG00000005763.15	Cd247	2.16669	0.872811		ENSMUSG00000008540.11	Mgst1	1.62982	0.888255
ENSMUSG00000002870.8	Mcm2	-2.39785	0.909417		ENSMUSG00000044103.4	Il1f9	-1.82007	0.856369		ENSMUSG00000021281.15	Tnfaip2	1.18124	0.840403
ENSMUSG00000037235.13	Mxd4	2.34567	0.909414		ENSMUSG00000036256.13	Igfbp7	1.60115	0.846468		ENSMUSG00000054364.5	Rhob	-1.98505	0.894628
ENSMUSG00000056220.14	Pla2g4a	-2.47559	0.909042		ENSMUSG00000017493.12	Igfbp4	1.35627	0.807477		ENSMUSG00000020184.15	Mdm2	-1.33576	0.858635
ENSMUSG00000026981.15	Il1rn	-2.81859	0.908884		ENSMUSG00000088552.1	Mir1957a	-2.37394	0.868161		ENSMUSG00000000682.7	Cd52	1.16414	0.837073
ENSMUSG00000048120.16	Entpd1	2.54254	0.908716		ENSMUSG00000089929.1	Bcl2a1b	1.64406	0.838532		ENSMUSG00000058135.12	Gstm1	1.0006	0.828668
ENSMUSG00000024640.9	Psat1	-2.48864	0.908398		ENSMUSG00000052942.13	Glis3	-1.70725	0.839441		ENSMUSG00000064267.13	Hvcn1	1.66186	0.888363
ENSMUSG00000002068.16	Ccne1	-2.41074	0.907868		ENSMUSG00000029371.7	Cxcl5	-1.98307	0.841938		ENSMUSG00000020101.14	Vsir	1.1921	0.841016
ENSMUSG00000028859.14	Csf3r	3.24177	0.907403		ENSMUSG00000033834.7	Tpbpa	-2.95443	0.866703		ENSMUSG00000026748.13	Plxdc2	3.32131	0.962305
ENSMUSG00000026170.6	Cyp27a1	2.66021	0.906756		ENSMUSG00000022508.5	Bcl6	-1.59661	0.835086		ENSMUSG00000022180.7	Slc7a8	-1.73921	0.890175
ENSMUSG00000042745.9	Id1	-2.67751	0.906407		ENSMUSG00000032578.7	Cish	1.99668	0.85005		ENSMUSG00000030161.8	Gabarapl1	1.05688	0.829505
ENSMUSG00000020883.18	Fbxl20	2.47069	0.905784		ENSMUSG00000031778.13	Cx3cl1	2.63912	0.851053		ENSMUSG00000067212.8	H2-T23	1.1455	0.836729
ENSMUSG00000021822.3	Plau	-2.16681	0.90561		ENSMUSG00000084613.1	n-R5s164	-2.02672	0.840137		ENSMUSG00000024164.15	C3	2.67923	0.91327
ENSMUSG00000025747.12	Tyms	-2.57851	0.905572		ENSMUSG00000068129.5	Cst7	1.62991	0.821201		ENSMUSG00000060586.10	H2-Eb1	2.56888	0.910876
ENSMUSG00000022895.16	Ets2	-2.31399	0.905437		ENSMUSG00000016529.5	Il10	-2.24358	0.835484		ENSMUSG00000023913.17	Pla2g7	2.00163	0.904229
ENSMUSG00000042489.15	Clspn	-2.34163	0.905421		ENSMUSG00000051159.16	Cited1	-2.1731	0.808465		ENSMUSG00000035273.14	Hpse	1.78845	0.890094
ENSMUSG00000040093.15	Bmf	3.20196	0.905411		ENSMUSG00000074115.5	Saa1	-3.86391	0.82427		ENSMUSG00000030789.9	Itgax	1.19752	0.840823
ENSMUSG00000005470.8	Asf1b	-2.21379	0.905336							ENSMUSG00000097415.2	AU020206	1.67895	0.888166
ENSMUSG00000027715.9	Ccna2	-2.19018	0.905288							ENSMUSG00000021701.8	Plk2	-1.21721	0.846064
ENSMUSG00000023004.8	Tuba1b	-2.13334	0.9049							ENSMUSG00000036067.12	Slc2a6	1.0562	0.829118
ENSMUSG00000021846.9	Peli2	2.33344	0.904894							ENSMUSG00000042286.13	Stab1	-1.16515	0.83954
ENSMUSG00000001627.12	Ifrd1	-2.1862	0.904734							ENSMUSG00000001123.15	Lgals9	-1.07299	0.829437
ENSMUSG00000001525.10	Tubb5	-2.00432	0.904644							ENSMUSG00000021892.14	Sh3bp5	-1.02165	0.82801
ENSMUSG00000015340.10	Cybb	2.03264	0.904594							ENSMUSG00000029470.15	P2rx4	1.30831	0.848458
ENSMUSG00000001403.13	Ube2c	-2.26153	0.904511							ENSMUSG00000031903.7	Pla2g15	1.26253	0.847682
ENSMUSG00000024672.11	Ms4a7	2.09684	0.904487							ENSMUSG00000028583.14	Pdpn	-1.37228	0.858308
ENSMUSG00000001473.6	Tubb6	-2.12274	0.904336							ENSMUSG00000003420.8	Fcgrt	1.4998	0.864951
ENSMUSG00000026355.11	Mcm6	-2.16006	0.904281							ENSMUSG00000035352.3	Ccl12	-5.77323	0.997447
ENSMUSG00000033355.6	Rtp4	-2.14447	0.904261							ENSMUSG00000056234.15	Ncoa4	1.43081	0.862486
ENSMUSG00000020914.17	Top2a	-2.03868	0.904237							ENSMUSG00000049625.6	Tifab	1.89632	0.893531
ENSMUSG00000028037.13	Ifi44	-1.99776	0.904229							ENSMUSG00000040848.11	Sft2d2	1.0857	0.830584
ENSMUSG00000000982.5	Ccl3	-2.00271	0.904165							ENSMUSG00000021451.16	Sema4d	1.14901	0.836085
ENSMUSG00000069793.12	Slfn9	-2.26143	0.904108							ENSMUSG00000001627.12	Ifrd1	-1.63758	0.887338
ENSMUSG00000038886.10	Man2a2	2.10595	0.90408							ENSMUSG00000060044.8	Tmem26	-2.00618	0.903767
ENSMUSG00000022033.9	Pbk	-2.18718	0.904032							ENSMUSG00000034424.5	Gcsh	-1.26571	0.847542
ENSMUSG00000036833.16	Pnpla7	2.01118	0.903904							ENSMUSG00000038886.10	Man2a2	1.5637	0.865043
ENSMUSG00000041827.15	Oasl1	-2.26303	0.903904							ENSMUSG00000034377.10	Tulp4	-1.44838	0.862547
ENSMUSG00000030346.16	Rad51ap1	-2.32662	0.903668							ENSMUSG00000018899.16	Irf1	1.76118	0.889407
ENSMUSG00000027323.10	Rad51	-2.52409	0.903659							ENSMUSG00000042613.9	Pbxip1	1.14488	0.835543
ENSMUSG00000026358.13	Rgs1	-2.05056	0.903339							ENSMUSG00000042675.15	Ypel3	1.82896	0.892498
ENSMUSG00000074896.3	Ifit3	-2.55716	0.903231							ENSMUSG00000056612.6	Ppp1r14b	-1.07087	0.828953
ENSMUSG00000027379.13	Bub1	-2.19297	0.903205							ENSMUSG00000001751.9	Naglu	1.18784	0.839953
ENSMUSG00000026012.2	Cd28	2.14527	0.902925							ENSMUSG00000001542.7	Ell2	-1.231	0.845404
ENSMUSG00000036777.8	Anln	-2.03609	0.902916							ENSMUSG00000043832.13	Clec4a3	1.17016	0.838797
ENSMUSG00000020641.16	Rsad2	-2.73742	0.90261							ENSMUSG00000013707.3	Tnfaip8l2	1.41294	0.858743
ENSMUSG00000024590.8	Lmnb1	-2.24762	0.902482							ENSMUSG00000003032.8	Klf4	-0.999032	0.827205
ENSMUSG00000017716.15	Birc5	-2.11784	0.901871							ENSMUSG00000004952.13	Rasa4	1.2471	0.845573
ENSMUSG00000026669.14	Mcm10	-2.42575	0.901545							ENSMUSG00000028121.8	Bcar3	-1.0118	0.827091
ENSMUSG00000039908.14	Slc26a11	2.21125	0.901471							ENSMUSG00000036833.16	Pnpla7	1.42113	0.861673
ENSMUSG00000032911.6	Cspg4	-2.72721	0.901125							ENSMUSG00000042712.10	Tceal9	1.00198	0.827091
ENSMUSG00000022346.15	Myc	-2.63826	0.90102							ENSMUSG00000019970.15	Sgk1	1.1307	0.832729
ENSMUSG00000030083.11	Abtb1	2.01753	0.900354							ENSMUSG00000007872.3	Id3	1.19499	0.839476
ENSMUSG00000032397.7	Tipin	-2.00508	0.899986							ENSMUSG00000030189.15	Ybx3	-1.16862	0.838484
ENSMUSG00000087362.7	Gm13710	2.45912	0.899458							ENSMUSG00000085295.7	4930430E12Rik	-1.25889	0.846705
ENSMUSG00000078452.10	Raet1d	-2.69846	0.899405							ENSMUSG00000101389.1	Ms4a4a	2.05919	0.902985
ENSMUSG00000017861.11	Mybl2	-2.69028	0.899308							ENSMUSG00000002871.14	Tpra1	1.00193	0.826992
ENSMUSG00000113757.1	Gm47507	-3.64412	0.898845							ENSMUSG00000057137.9	Tmem140	1.44626	0.861712
ENSMUSG00000025001.11	Hells	-2.49378	0.898651							ENSMUSG00000028156.12	Eif4e	-1.1339	0.832456
ENSMUSG00000019773.7	Fbxo5	-2.12607	0.898419							ENSMUSG00000034908.16	Sidt2	1.06498	0.827803
ENSMUSG00000038352.15	Arl5c	2.01923	0.898094							ENSMUSG00000020009.13	Ifngr1	1.14972	0.834958
ENSMUSG00000029373.7	Pf4	-2.2527	0.897947							ENSMUSG00000002602.16	Axl	2.04573	0.90268
ENSMUSG00000046179.17	E2f8	-2.21998	0.897917							ENSMUSG00000029098.17	Acox3	1.16243	0.835057
ENSMUSG00000027454.10	Gins1	-2.1638	0.897256							ENSMUSG00000018930.3	Ccl4	-2.13012	0.902987
ENSMUSG00000020638.8	Cmpk2	-2.09928	0.896993							ENSMUSG00000029762.6	Akr1b8	-1.38605	0.858126
ENSMUSG00000055612.15	Cdca7	-2.64197	0.89698							ENSMUSG00000025469.10	Msx3	-3.08293	0.913481
ENSMUSG00000022945.12	Chaf1b	-2.18778	0.896835							ENSMUSG00000029338.13	Antxr2	1.23339	0.844531
ENSMUSG00000028702.15	Rad54l	-2.27158	0.896525							ENSMUSG00000030329.11	Pianp	1.21629	0.844425
ENSMUSG00000013089.15	Etv5	-2.24041	0.896496							ENSMUSG00000000982.5	Ccl3	-1.47857	0.862606
ENSMUSG00000027496.15	Aurka	-1.99512	0.896494							ENSMUSG00000030560.17	Ctsc	1.32369	0.85633
ENSMUSG00000036768.6	Kif15	-2.06964	0.896074							ENSMUSG00000032359.14	Ctsh	1.23913	0.844476
ENSMUSG00000020089.8	Ppa1	-2.24948	0.895955							ENSMUSG00000018920.11	Cxcl16	1.47581	0.86232
ENSMUSG00000079293.11	Clec7a	2.21433	0.895785							ENSMUSG00000024772.9	Ehd1	-1.02061	0.82598
ENSMUSG00000033207.6	Mamdc2	2.59924	0.895682							ENSMUSG00000037235.13	Mxd4	1.18265	0.837537
ENSMUSG00000035683.13	Melk	-2.04095	0.89556							ENSMUSG00000062901.3	Klhl24	2.00462	0.901846
ENSMUSG00000072082.6	Ccnf	-2.03364	0.895071							ENSMUSG00000023942.15	Slc29a1	1.18456	0.837164
ENSMUSG00000045382.6	Cxcr4	1.92224	0.894841							ENSMUSG00000032038.7	St3gal4	1.29895	0.845948
ENSMUSG00000036752.4	Tubb4b	-1.92699	0.894799							ENSMUSG00000041731.13	Pgm5	-1.04194	0.825785
ENSMUSG00000023067.14	Cdkn1a	-1.92071	0.894798							ENSMUSG00000029413.14	Naaa	1.00096	0.825354
ENSMUSG00000015568.16	Lpl	-1.89282	0.89476							ENSMUSG00000040950.13	Mgl2	-2.21978	0.902678
ENSMUSG00000043091.9	Tuba1c	-1.87022	0.89447							ENSMUSG00000060791.15	Gmfg	1.22965	0.843139
ENSMUSG00000007080.14	Pole	-2.58406	0.894206							ENSMUSG00000001435.15	Col18a1	-1.01318	0.824554
ENSMUSG00000041859.10	Mcm3	-1.9914	0.893927							ENSMUSG00000078429.9	Ctdsp2	1.54979	0.861817
ENSMUSG00000024222.17	Fkbp5	-2.08576	0.893922							ENSMUSG00000039206.13	Daglb	1.04959	0.825162
ENSMUSG00000029366.10	Dck	-1.95184	0.893904							ENSMUSG00000046688.14	Tifa	1.24775	0.842921
ENSMUSG00000022150.16	Dab2	-1.80593	0.893856							ENSMUSG00000005043.13	Sgsh	1.11527	0.829975
ENSMUSG00000031004.8	Mki67	-1.90413	0.893835							ENSMUSG00000060131.11	Atp8b4	-1.383	0.855643
ENSMUSG00000025498.15	Irf7	-1.863	0.893635							ENSMUSG00000040415.15	Dtx3	1.16455	0.83274
ENSMUSG00000005667.8	Mthfd2	-1.97661	0.893532							ENSMUSG00000030605.15	Mfge8	1.07646	0.826149
ENSMUSG00000001517.14	Foxm1	-1.94732	0.89353							ENSMUSG00000040128.9	Pnrc1	1.05482	0.824121
ENSMUSG00000029561.17	Oasl2	-1.81341	0.893515							ENSMUSG00000027955.16	Fam198b	-1.43068	0.858138
ENSMUSG00000030189.15	Ybx3	-1.87295	0.893511							ENSMUSG00000059851.15	Kmt5c	1.24073	0.841541
ENSMUSG00000038943.16	Prc1	-1.87957	0.893478							ENSMUSG00000003500.13	Impdh1	-1.03187	0.823592
ENSMUSG00000028044.6	Cks1b	-1.90825	0.893409							ENSMUSG00000020399.14	Havcr2	-1.156	0.831635
ENSMUSG00000041431.16	Ccnb1	-1.94064	0.893402							ENSMUSG00000025150.10	Cbr2	-1.65365	0.88287
ENSMUSG00000029730.16	Mcm7	-1.85202	0.893383							ENSMUSG00000078532.9	Nkain1	-1.20155	0.83562
ENSMUSG00000030978.10	Rrm1	-1.86047	0.893363							ENSMUSG00000000318.16	Clec10a	-2.10655	0.89882
ENSMUSG00000050410.15	Tcf19	-1.93877	0.893294							ENSMUSG00000004317.14	Clcn5	-1.04634	0.823352
ENSMUSG00000056394.17	Lig1	-1.99371	0.892913							ENSMUSG00000035929.11	H2-Q4	1.04142	0.823044
ENSMUSG00000038252.13	Ncapd2	-1.84975	0.892895							ENSMUSG00000032000.17	Birc3	1.76822	0.88459
ENSMUSG00000021069.17	Pygl	1.84297	0.892793							ENSMUSG00000026821.15	Ralgds	1.59067	0.882259
ENSMUSG00000053219.15	Raet1e	-3.13312	0.892667							ENSMUSG00000004552.16	Ctse	2.15675	0.899051
ENSMUSG00000020808.3	Pimreg	-1.9141	0.892456							ENSMUSG00000074141.13	Il4i1	3.54214	0.956297
ENSMUSG00000000028.15	Cdc45	-2.09164	0.892439							ENSMUSG00000074973.4	Gm11382	-1.93502	0.888347
ENSMUSG00000078429.9	Ctdsp2	1.85068	0.89243							ENSMUSG00000020034.7	Tcp11l2	2.45381	0.904638
ENSMUSG00000023505.13	Cdca3	-1.83825	0.89225							ENSMUSG00000030615.12	Tmem126a	-1.01412	0.822126
ENSMUSG00000036086.16	Zranb3	-1.9325	0.892237							ENSMUSG00000025584.17	Pde8a	-1.05803	0.823166
ENSMUSG00000021701.8	Plk2	-1.82877	0.892185							ENSMUSG00000078780.7	Gm5150	-2.54192	0.904341
ENSMUSG00000031530.6	Dusp4	-1.91259	0.891558							ENSMUSG00000039910.10	Cited2	1.11542	0.826851
ENSMUSG00000005233.16	Spc25	-1.82486	0.891498							ENSMUSG00000050578.10	Mmp13	-1.81991	0.886303
ENSMUSG00000027469.16	Tpx2	-1.99423	0.891354							ENSMUSG00000056758.14	Hmga2	-1.69781	0.881954
ENSMUSG00000041132.11	N4bp2l1	1.92838	0.891336							ENSMUSG00000025804.5	Ccr1	-1.81251	0.885874
ENSMUSG00000005732.14	Ranbp1	-1.92873	0.891336							ENSMUSG00000056220.14	Pla2g4a	-1.03409	0.821082
ENSMUSG00000030867.7	Plk1	-1.88784	0.891283							ENSMUSG00000022895.16	Ets2	-1.33974	0.850916
ENSMUSG00000039146.5	Ifi44l	-1.84477	0.891264							ENSMUSG00000021127.7	Zfp36l1	1.14161	0.828872
ENSMUSG00000028312.19	Smc2	-1.85341	0.891262							ENSMUSG00000032089.16	Il10ra	1.03025	0.820642
ENSMUSG00000025044.16	Msr1	-1.73981	0.890977							ENSMUSG00000056529.7	Ptafr	1.19822	0.833179
ENSMUSG00000027342.14	Pcna	-1.75001	0.890924							ENSMUSG00000028859.14	Csf3r	3.00147	0.907421
ENSMUSG00000020415.16	Pttg1	-1.85584	0.890831							ENSMUSG00000006611.15	Hfe	1.0257	0.820642
ENSMUSG00000053040.13	Aph1c	1.80848	0.890724							ENSMUSG00000032577.16	Mapkapk3	1.18702	0.832987
ENSMUSG00000083282.2	Ctsf	2.10595	0.890719							ENSMUSG00000036086.16	Zranb3	-1.3077	0.841025
ENSMUSG00000028832.11	Stmn1	-1.78258	0.890648							ENSMUSG00000027215.13	Cd82	1.27433	0.839849
ENSMUSG00000022322.8	Shcbp1	-2.0036	0.890645							ENSMUSG00000044456.16	Rin3	1.63869	0.879644
ENSMUSG00000042606.9	Hirip3	-1.91826	0.890459							ENSMUSG00000021069.17	Pygl	1.29439	0.839935
ENSMUSG00000023015.14	Racgap1	-1.78149	0.890447							ENSMUSG00000022106.14	Rcbtb2	1.00459	0.819578
ENSMUSG00000044629.5	Cnrip1	1.91766	0.890257							ENSMUSG00000047180.8	Neurl3	1.91154	0.885418
ENSMUSG00000035455.12	Fignl1	-2.11868	0.889869							ENSMUSG00000037697.19	Ddhd1	2.01453	0.895553
ENSMUSG00000019942.13	Cdk1	-1.74701	0.889837							ENSMUSG00000041801.5	Phlda3	-1.38622	0.850407
ENSMUSG00000027074.14	Slc43a3	-2.21755	0.889749							ENSMUSG00000021125.6	Arg2	3.08888	0.905844
ENSMUSG00000021270.13	Hsp90aa1	-1.71943	0.88958							ENSMUSG00000040274.11	Cdk6	-1.17621	0.830655
ENSMUSG00000029512.11	Ulk1	1.85354	0.889403							ENSMUSG00000030830.18	Itgal	1.88978	0.884667
ENSMUSG00000002996.17	Hbp1	1.72406	0.889339							ENSMUSG00000028756.12	Pink1	1.76518	0.880191
ENSMUSG00000021591.8	Glrx	-1.70923	0.888993							ENSMUSG00000029007.8	Agtrap	1.10968	0.821609
ENSMUSG00000026683.14	Nuf2	-1.9077	0.888962							ENSMUSG00000037822.12	Smim14	1.03776	0.818005
ENSMUSG00000035352.3	Ccl12	-6.61253	0.88895							ENSMUSG00000023055.10	Calcoco1	1.03766	0.818005
ENSMUSG00000028238.6	Atp6v0d2	1.85033	0.888915							ENSMUSG00000006442.10	Srm	-1.07833	0.818957
ENSMUSG00000037313.16	Tacc3	-1.77548	0.888901							ENSMUSG00000079049.9	Serpinb1c	-1.62651	0.8765
ENSMUSG00000021281.15	Tnfaip2	1.63837	0.888825							ENSMUSG00000026483.13	Fam129a	1.19762	0.829603
ENSMUSG00000040522.5	Tlr8	1.64984	0.8888							ENSMUSG00000024640.9	Psat1	-1.23957	0.834187
ENSMUSG00000028583.14	Pdpn	-1.66227	0.888624							ENSMUSG00000041132.11	N4bp2l1	1.62213	0.875669
ENSMUSG00000029430.13	Ran	-1.64667	0.888621							ENSMUSG00000004933.17	Matk	1.37327	0.845681
ENSMUSG00000035273.14	Hpse	1.6589	0.888587							ENSMUSG00000048120.16	Entpd1	2.40752	0.897484
ENSMUSG00000027306.15	Nusap1	-1.81625	0.888548							ENSMUSG00000042745.9	Id1	-1.71242	0.875846
ENSMUSG00000017830.15	Dhx58	-1.78128	0.888523							ENSMUSG00000019823.17	Mical1	1.272	0.834088
ENSMUSG00000048058.17	Ldlrad3	2.217	0.888454							ENSMUSG00000033355.6	Rtp4	-1.59206	0.87383
ENSMUSG00000002055.9	Spag5	-1.98746	0.888419							ENSMUSG00000048249.14	Crebrf	1.70167	0.873795
ENSMUSG00000013707.3	Tnfaip8l2	1.62898	0.888269							ENSMUSG00000030083.11	Abtb1	1.29007	0.833648
ENSMUSG00000015749.12	Anp32e	-1.60886	0.888253							ENSMUSG00000054293.10	P2ry10b	-1.02848	0.813411
ENSMUSG00000028678.13	Kif2c	-1.87749	0.888199							ENSMUSG00000019966.18	Kitl	-1.0442	0.813624
ENSMUSG00000020330.16	Hmmr	-1.86818	0.888199							ENSMUSG00000004151.17	Etv1	-1.46388	0.848098
ENSMUSG00000046223.10	Plaur	-1.69361	0.888162							ENSMUSG00000068747.14	Sort1	1.46354	0.848098
ENSMUSG00000024165.9	Jpt2	-1.58761	0.888157							ENSMUSG00000026170.6	Cyp27a1	2.33499	0.894142
ENSMUSG00000007872.3	Id3	1.6623	0.888143							ENSMUSG00000027843.13	Ptpn22	-1.76087	0.873683
ENSMUSG00000041058.15	Wwp1	1.73285	0.888013							ENSMUSG00000054510.5	Gm14461	1.13776	0.818566
ENSMUSG00000020897.12	Aurkb	-1.69829	0.887823							ENSMUSG00000041135.15	Ripk2	-1.23468	0.828585
ENSMUSG00000046711.16	Hmga1	-1.60937	0.887819							ENSMUSG00000028064.17	Sema4a	1.39313	0.842092
ENSMUSG00000040128.9	Pnrc1	1.69163	0.887755							ENSMUSG00000038352.15	Arl5c	2.53696	0.893177
ENSMUSG00000021250.13	Fos	-1.67755	0.887723							ENSMUSG00000037111.9	Setd7	1.08599	0.812059
ENSMUSG00000027018.11	Hat1	-1.73578	0.887622							ENSMUSG00000039976.4	Tbc1d16	1.23607	0.827285
ENSMUSG00000024401.14	Tnf	-1.77684	0.887526							ENSMUSG00000039656.16	Rxrb	1.00218	0.807754
ENSMUSG00000025161.16	Slc16a3	-1.73077	0.887517							ENSMUSG00000079547.3	H2-DMb1	2.76023	0.892573
ENSMUSG00000041731.13	Pgm5	-1.75741	0.887513							ENSMUSG00000028780.13	Sema3c	-2.58751	0.892451
ENSMUSG00000028873.16	Cdca8	-1.63641	0.887471							ENSMUSG00000105769.1	Gm43351	-1.04586	0.808317
ENSMUSG00000027641.13	Rbl1	-1.84058	0.887427							ENSMUSG00000033207.6	Mamdc2	2.38404	0.889722
ENSMUSG00000028884.14	Rpa2	-1.59304	0.887203							ENSMUSG00000055782.9	Abcd2	1.76505	0.86754
ENSMUSG00000022673.5	Mcm4	-1.68053	0.88707							ENSMUSG00000021846.9	Peli2	2.27512	0.883042
ENSMUSG00000007050.17	Lsm2	-1.77856	0.887054							ENSMUSG00000049037.8	Clec4a1	1.24156	0.823785
ENSMUSG00000023908.8	Pkmyt1	-2.08312	0.887045							ENSMUSG00000049130.6	C5ar1	-1.38169	0.836994
ENSMUSG00000017146.12	Brca1	-2.29553	0.887009							ENSMUSG00000037370.13	Enpp1	-1.08283	0.807825
ENSMUSG00000028066.15	Pmf1	-1.65425	0.886821							ENSMUSG00000029512.11	Ulk1	1.27357	0.825515
ENSMUSG00000061589.14	Dot1l	-1.69584	0.886716							ENSMUSG00000030315.15	Vgll4	1.02034	0.805934
ENSMUSG00000032218.7	Ccnb2	-1.71058	0.88658							ENSMUSG00000027995.10	Tlr2	1.92124	0.869363
ENSMUSG00000023055.10	Calcoco1	1.63112	0.886483							ENSMUSG00000015396.4	Cd83	1.72674	0.864081
ENSMUSG00000018395.19	Kif3a	1.69091	0.886427							ENSMUSG00000020089.8	Ppa1	-1.50467	0.840561
ENSMUSG00000028633.7	Ctps	-2.6197	0.886369							ENSMUSG00000020018.6	Snrpf	-0.99834	0.803828
ENSMUSG00000029414.11	Kntc1	-2.47171	0.886343							ENSMUSG00000018931.3	Natd1	1.21867	0.821508
ENSMUSG00000032400.18	Zwilch	-1.8853	0.886175							ENSMUSG00000050370.4	Ch25h	-6.89959	0.974428
ENSMUSG00000021127.7	Zfp36l1	1.89398	0.886175							ENSMUSG00000040809.10	Chil3	1.33824	0.831148
ENSMUSG00000043832.13	Clec4a3	1.72907	0.886073							ENSMUSG00000026012.2	Cd28	1.7032	0.861689
ENSMUSG00000040026.8	Saa3	1.91936	0.885831							ENSMUSG00000027589.14	Pcmtd2	1.07713	0.803401
ENSMUSG00000031821.11	Gins2	-2.08696	0.885629							ENSMUSG00000039908.14	Slc26a11	1.29384	0.821624
ENSMUSG00000029687.16	Ezh2	-1.7924	0.885469							ENSMUSG00000015854.7	Cd5l	-2.52337	0.881064
ENSMUSG00000034855.13	Cxcl10	-2.89626	0.884978							ENSMUSG00000020883.18	Fbxl20	1.42083	0.833195
ENSMUSG00000034906.15	Ncaph	-1.68599	0.884859							ENSMUSG00000042333.16	Tnfrsf14	1.52951	0.835795
ENSMUSG00000022094.15	Slc39a14	-1.79875	0.884592							ENSMUSG00000079057.4	Cyp4v3	1.10045	0.802643
ENSMUSG00000028614.14	Ndc1	-1.75914	0.884439							ENSMUSG00000001707.8	Eef1e1	-1.49577	0.835608
ENSMUSG00000040084.9	Bub1b	-1.76407	0.884439							ENSMUSG00000029385.14	Ccng2	1.54691	0.832761
ENSMUSG00000004552.16	Ctse	1.80305	0.884243							ENSMUSG00000038437.11	Mllt6	1.27383	0.815411
ENSMUSG00000025395.14	Prim1	-1.95276	0.884172							ENSMUSG00000008734.9	Gprc5b	-1.53566	0.832761
ENSMUSG00000002835.9	Chaf1a	-2.03432	0.883946							ENSMUSG00000037341.14	Slc9a7	2.17353	0.872622
ENSMUSG00000006442.10	Srm	-1.69663	0.88386							ENSMUSG00000015852.13	Fcrls	1.44759	0.830382
ENSMUSG00000035678.8	Tnfsf9	-2.7108	0.883821							ENSMUSG00000032911.6	Cspg4	-1.38148	0.82333
ENSMUSG00000003779.15	Kif20a	-1.63201	0.883796							ENSMUSG00000009185.2	Ccl8	-2.46768	0.874373
ENSMUSG00000078532.9	Nkain1	-1.67893	0.883637							ENSMUSG00000003031.14	Cdkn1b	1.24673	0.806465
ENSMUSG00000046341.5	Gm11223	-1.70809	0.883585							ENSMUSG00000021575.16	Ahrr	2.02892	0.863689
ENSMUSG00000022351.14	Sqle	-1.58217	0.883523							ENSMUSG00000023044.2	Csad	1.52896	0.820387
ENSMUSG00000027699.19	Ect2	-1.88872	0.883288							ENSMUSG00000075122.5	Cd80	-1.46118	0.819319
ENSMUSG00000009575.14	Cbx5	-1.60918	0.882978							ENSMUSG00000083282.2	Ctsf	1.4334	0.817869
ENSMUSG00000027203.15	Dut	-1.90836	0.882636							ENSMUSG00000104554.1	Gm4610	-2.68208	0.867855
ENSMUSG00000017499.15	Cdc6	-3.15001	0.882588							ENSMUSG00000023947.8	Nfkbie	1.22509	0.801441
ENSMUSG00000029385.14	Ccng2	1.74722	0.882405							ENSMUSG00000025278.9	Flnb	-1.52262	0.820355
ENSMUSG00000023044.2	Csad	2.01289	0.882096							ENSMUSG00000036452.17	Arhgap26	1.24069	0.801526
ENSMUSG00000026622.15	Nek2	-1.7956	0.882058							ENSMUSG00000028278.14	Rragd	1.31977	0.807694
ENSMUSG00000038644.14	Pold1	-1.60521	0.882032							ENSMUSG00000002250.16	Ppard	1.52315	0.814736
ENSMUSG00000034883.9	Lrr1	-2.83667	0.881925							ENSMUSG00000027863.8	Cd2	1.66013	0.83715
ENSMUSG00000037474.13	Dtl	-2.31098	0.881514							ENSMUSG00000032265.14	Tent5a	1.39037	0.80917
ENSMUSG00000045932.12	Ifit2	-1.74533	0.881417							ENSMUSG00000022504.10	Ciita	3.39864	0.911035
ENSMUSG00000039994.15	Timeless	-2.39355	0.881002							ENSMUSG00000036469.16	March1	2.15565	0.84729
ENSMUSG00000046295.13	Ankle1	-2.40402	0.881002							ENSMUSG00000068129.5	Cst7	-1.80127	0.832943
ENSMUSG00000028068.14	Iqgap3	-1.83442	0.880876							ENSMUSG00000031779.3	Ccl22	1.74106	0.832802
ENSMUSG00000039396.11	Neil3	-1.76224	0.880848							ENSMUSG00000028874.14	Fgr	1.45929	0.807503
ENSMUSG00000079553.10	Kifc1	-1.72125	0.880752							ENSMUSG00000023349.14	Clec4n	2.44018	0.853153
ENSMUSG00000049037.8	Clec4a1	1.70701	0.880728							ENSMUSG00000074364.6	Ehd2	-3.67562	0.904825
ENSMUSG00000062075.13	Lmnb2	-1.68484	0.880726							ENSMUSG00000027276.7	Jag1	-1.71482	0.831641
ENSMUSG00000012443.3	Kif11	-1.86475	0.880065							ENSMUSG00000024975.12	Pdcd4	1.72596	0.831674
ENSMUSG00000024056.10	Ndc80	-1.80716	0.879959							ENSMUSG00000026981.15	Il1rn	-1.5582	0.808512
ENSMUSG00000015880.13	Ncapg	-1.9648	0.87987							ENSMUSG00000014846.12	Tppp3	1.52384	0.808512
ENSMUSG00000048327.6	Ckap2l	-1.87972	0.87965							ENSMUSG00000021356.10	Irf4	1.41592	0.806054
ENSMUSG00000027068.6	Dhrs9	-1.882	0.87965							ENSMUSG00000041762.16	Gpr155	1.55873	0.808512
ENSMUSG00000019966.18	Kitl	-1.71223	0.879016							ENSMUSG00000038065.13	Mturn	2.66457	0.848468
ENSMUSG00000057406.16	Nsd2	-1.67102	0.878987							ENSMUSG00000002983.17	Relb	1.91764	0.820573
ENSMUSG00000037544.14	Dlgap5	-1.80526	0.878858							ENSMUSG00000021062.15	Rab15	-2.24219	0.831932
ENSMUSG00000026020.9	Nop58	-1.60882	0.87879							ENSMUSG00000004814.10	Ccl24	4.09851	0.877987
ENSMUSG00000037466.13	Tedc1	-1.92849	0.878633							ENSMUSG00000022893.14	Adamts1	-1.86308	0.809446
ENSMUSG00000041313.14	Slc7a1	-1.88547	0.878441							ENSMUSG00000006445.3	Epha2	-3.96732	0.865683
ENSMUSG00000031714.9	Gab1	2.81203	0.878428							ENSMUSG00000044041.4	Krt13	3.16628	0.818969
ENSMUSG00000036672.5	Cenpt	-1.73109	0.878364							ENSMUSG00000000303.12	Cdh1	-2.3885	0.814114
ENSMUSG00000022881.15	Rfc4	-1.7147	0.878341							ENSMUSG00000020614.13	Fam20a	-3.72967	0.811872
ENSMUSG00000024975.12	Pdcd4	2.46117	0.878301							ENSMUSG00000040093.15	Bmf	3.77303	0.811872
ENSMUSG00000040034.15	Nup43	-1.99891	0.877726							ENSMUSG00000029810.15	Tmem176b	4.44807	0.807052
ENSMUSG00000059824.12	Dbp	1.97102	0.877356
ENSMUSG00000074476.6	Spc24	-1.92432	0.877302
ENSMUSG00000018983.9	E2f2	-1.67574	0.877031
ENSMUSG00000074973.4	Gm11382	-2.261	0.876522
ENSMUSG00000030246.11	Ldhb	2.17455	0.876344
ENSMUSG00000079049.9	Serpinb1c	-2.17957	0.876344
ENSMUSG00000011179.8	Odc1	-1.67388	0.876043
ENSMUSG00000066861.14	Oas1g	-1.78065	0.876042
ENSMUSG00000029363.14	Rfc5	-1.77495	0.876007
ENSMUSG00000037341.14	Slc9a7	1.98834	0.87588
ENSMUSG00000051517.14	Arhgef39	-1.60319	0.875846
ENSMUSG00000020493.8	Prr11	-2.13426	0.875395
ENSMUSG00000047592.17	Nxpe5	3.247	0.875232
ENSMUSG00000022021.14	Diaph3	-1.99711	0.875071
ENSMUSG00000048200.12	Cracr2b	1.85613	0.874974
ENSMUSG00000024665.7	Fads2	-1.80623	0.874868
ENSMUSG00000020185.16	E2f7	-2.53218	0.874832
ENSMUSG00000020492.11	Ska2	-1.80377	0.874824
ENSMUSG00000027843.13	Ptpn22	-1.80062	0.874824
ENSMUSG00000017002.14	Slpi	2.37085	0.874448
ENSMUSG00000073705.10	Cenps	-1.88469	0.874051
ENSMUSG00000033031.13	Cip2a	-1.7067	0.873494
ENSMUSG00000081999.3	Gm13461	-1.76292	0.873376
ENSMUSG00000048922.18	Cdca2	-1.90401	0.872212
ENSMUSG00000026873.9	Phf19	-1.87562	0.872202
ENSMUSG00000015217.11	Hmgb3	-2.09875	0.8721
ENSMUSG00000022034.10	Esco2	-2.01831	0.872026
ENSMUSG00000073489.6	Ifi204	-1.77276	0.872017
ENSMUSG00000037572.17	Wdhd1	-1.73581	0.87189
ENSMUSG00000024989.14	Cep55	-1.67486	0.871515
ENSMUSG00000040010.10	Slc7a5	-2.53836	0.87064
ENSMUSG00000045671.17	Spred2	-1.80129	0.870445
ENSMUSG00000050777.7	Tmem37	1.95396	0.870389
ENSMUSG00000034459.8	Ifit1	-1.99489	0.870389
ENSMUSG00000028278.14	Rragd	1.74421	0.870283
ENSMUSG00000030641.10	Ddias	-2.32466	0.870257
ENSMUSG00000067608.4	Pcna-ps2	-1.89342	0.87018
ENSMUSG00000027580.17	Helz2	-1.87151	0.87017
ENSMUSG00000029650.10	Slc46a3	2.2648	0.869982
ENSMUSG00000019214.13	Chtf18	-2.20117	0.869812
ENSMUSG00000034311.3	Kif4	-2.03282	0.868533
ENSMUSG00000006678.6	Pola1	-1.9967	0.868533
ENSMUSG00000036469.16	March1	2.03827	0.868533
ENSMUSG00000023919.7	Cenpq	-2.05211	0.868533
ENSMUSG00000039055.4	Eme1	-2.03227	0.868533
ENSMUSG00000052798.13	Nup107	-1.67143	0.868433
ENSMUSG00000044708.5	Kcnj10	2.72622	0.868357
ENSMUSG00000022385.11	Gtse1	-1.64639	0.86832
ENSMUSG00000078521.2	Aunip	-2.60248	0.868253
ENSMUSG00000036390.8	Gadd45a	1.91269	0.868
ENSMUSG00000025473.16	Adam8	-1.56468	0.867343
ENSMUSG00000022103.10	Gfra2	-3.63234	0.867309
ENSMUSG00000028599.10	Tnfrsf1b	1.5338	0.867199
ENSMUSG00000038379.15	Ttk	-1.83228	0.86705
ENSMUSG00000079017.3	Ifi27l2a	-1.4974	0.867009
ENSMUSG00000019961.17	Tmpo	-1.56185	0.866792
ENSMUSG00000021965.3	Ska3	-1.6807	0.866766
ENSMUSG00000029108.14	Pcdh7	-1.52081	0.866756
ENSMUSG00000010307.7	Tmem86a	1.57253	0.866652
ENSMUSG00000024193.7	Phf1	1.64717	0.866474
ENSMUSG00000030161.8	Gabarapl1	1.49359	0.866457
ENSMUSG00000020471.11	Pold2	-1.58445	0.866391
ENSMUSG00000046688.14	Tifa	1.56486	0.866233
ENSMUSG00000057137.9	Tmem140	1.56172	0.866213
ENSMUSG00000024691.13	Fam111a	-1.48586	0.866099
ENSMUSG00000025743.14	Sdc3	-1.46278	0.866073
ENSMUSG00000032725.10	Folr2	-1.45604	0.866058
ENSMUSG00000020358.17	Hnrnpab	-1.46703	0.865964
ENSMUSG00000034424.5	Gcsh	-1.48525	0.865845
ENSMUSG00000030795.18	Fus	-1.47158	0.86567
ENSMUSG00000078249.5	Hmga1b	-1.46741	0.8655
ENSMUSG00000044162.12	Tnip3	-1.51688	0.865109
ENSMUSG00000076441.9	Ass1	-1.47877	0.86506
ENSMUSG00000019122.8	Ccl9	-1.4201	0.864681
ENSMUSG00000037628.10	Cdkn3	-2.13688	0.86468
ENSMUSG00000029283.17	Cdc7	-2.12565	0.864668
ENSMUSG00000006585.3	Cdt1	-1.57462	0.864651
ENSMUSG00000012519.14	Mlkl	-1.80512	0.864396
ENSMUSG00000033307.7	Mif	-1.42082	0.864382
ENSMUSG00000021811.7	Dnajc9	-1.51229	0.86436
ENSMUSG00000029470.15	P2rx4	1.44577	0.864357
ENSMUSG00000032254.10	Kif23	-1.46352	0.864335
ENSMUSG00000024770.14	Lipn	-1.46409	0.864233
ENSMUSG00000028937.14	Acot7	-1.41964	0.86395
ENSMUSG00000022391.16	Rangap1	-1.43444	0.863871
ENSMUSG00000060860.8	Ube2s	-1.44552	0.86367
ENSMUSG00000032661.9	Oas3	-1.44964	0.863405
ENSMUSG00000032089.16	Il10ra	1.43177	0.863221
ENSMUSG00000047180.8	Neurl3	1.41733	0.863104
ENSMUSG00000030830.18	Itgal	1.44514	0.863097
ENSMUSG00000052776.10	Oas1a	-1.42119	0.862847
ENSMUSG00000015947.10	Fcgr1	-1.44888	0.862795
ENSMUSG00000030107.10	Usp18	-1.43691	0.862633
ENSMUSG00000079316.10	Rab9	1.45403	0.862417
ENSMUSG00000051378.10	Kif18b	-1.98218	0.862354
ENSMUSG00000021493.15	Pdlim7	-1.61809	0.862031
ENSMUSG00000040433.16	Zbtb38	1.53849	0.861952
ENSMUSG00000042129.8	Rassf4	1.40195	0.861493
ENSMUSG00000041268.17	Dmxl2	1.73781	0.86142
ENSMUSG00000030677.8	Kif22	-1.54507	0.861411
ENSMUSG00000025950.16	Idh1	1.38298	0.861332
ENSMUSG00000027331.15	Knstrn	-1.42915	0.861304
ENSMUSG00000058135.12	Gstm1	1.37809	0.861296
ENSMUSG00000032000.17	Birc3	1.42129	0.861258
ENSMUSG00000060376.7	Bckdha	1.42791	0.861165
ENSMUSG00000049723.14	Mmp12	-1.37758	0.86115
ENSMUSG00000068101.11	Cenpm	-2.26285	0.861068
ENSMUSG00000028019.9	Pdgfc	2.30343	0.861068
ENSMUSG00000066621.12	Tecpr1	1.41056	0.86091
ENSMUSG00000026281.15	Dtymk	-1.54026	0.86081
ENSMUSG00000028560.11	Usp1	-1.48008	0.860597
ENSMUSG00000010358.13	Ifi35	-1.41808	0.860445
ENSMUSG00000001270.9	Ckb	-1.36352	0.860378
ENSMUSG00000040658.7	Dnph1	-1.72076	0.860279
ENSMUSG00000056758.14	Hmga2	-1.49928	0.860227
ENSMUSG00000028459.11	Cd72	-1.35161	0.860057
ENSMUSG00000026238.14	Ptma	-1.33484	0.860016
ENSMUSG00000031328.15	Flna	-1.34131	0.859943
ENSMUSG00000027078.14	Ube2l6	-1.35931	0.859943
ENSMUSG00000028156.12	Eif4e	-1.41352	0.859902
ENSMUSG00000022180.7	Slc7a8	-1.3652	0.859889
ENSMUSG00000034908.16	Sidt2	1.3589	0.859816
ENSMUSG00000000751.13	Rpa1	-1.40278	0.859692
ENSMUSG00000018362.14	Kpna2	-1.36111	0.859658
ENSMUSG00000040274.11	Cdk6	-1.52027	0.859579
ENSMUSG00000063694.5	Cycs	-1.51613	0.859579
ENSMUSG00000028671.16	Gale	-1.67049	0.859571
ENSMUSG00000038967.13	Pdk2	1.67274	0.859571
ENSMUSG00000032594.11	Ip6k1	1.36949	0.859546
ENSMUSG00000019970.15	Sgk1	1.38455	0.859473
ENSMUSG00000091649.3	Phf11b	-1.61374	0.859381
ENSMUSG00000001542.7	Ell2	-1.38468	0.859222
ENSMUSG00000031697.12	Orc6	-1.52394	0.859154
ENSMUSG00000027397.14	Slc20a1	-1.37928	0.859143
ENSMUSG00000024007.14	Ppil1	-1.41611	0.859062
ENSMUSG00000058290.4	Espl1	-1.96218	0.858861
ENSMUSG00000049130.6	C5ar1	-1.34025	0.858849
ENSMUSG00000037601.11	Nme1	-1.92094	0.858808
ENSMUSG00000044783.16	Hjurp	-1.34998	0.858643
ENSMUSG00000027405.16	Nop56	-1.37047	0.858612
ENSMUSG00000040415.15	Dtx3	1.3377	0.858596
ENSMUSG00000002477.4	Snrpd1	-1.3889	0.858498
ENSMUSG00000058672.7	Tubb2a	-1.33244	0.858362
ENSMUSG00000032279.11	Idh3a	-1.46865	0.858114
ENSMUSG00000005043.13	Sgsh	1.31974	0.857972
ENSMUSG00000040483.15	Xaf1	-1.52899	0.857764
ENSMUSG00000006398.15	Cdc20	-1.38573	0.857679
ENSMUSG00000027589.14	Pcmtd2	1.49563	0.857553
ENSMUSG00000069910.2	Spdl1	-1.41844	0.857438
ENSMUSG00000020739.11	Nup85	-1.32155	0.857409
ENSMUSG00000029401.8	Rilpl2	1.34056	0.857172
ENSMUSG00000028069.16	Gpatch4	-1.60018	0.85634
ENSMUSG00000038005.15	Hpf1	-1.3277	0.856266
ENSMUSG00000003546.10	Klc4	1.34305	0.85577
ENSMUSG00000030315.15	Vgll4	1.37557	0.855509
ENSMUSG00000032815.16	Fanca	-2.21784	0.855487
ENSMUSG00000045799.6	Gm9800	-1.36105	0.855384
ENSMUSG00000110631.1	Gm42047	-1.38758	0.855044
ENSMUSG00000035198.9	Tubg1	-1.39212	0.854695
ENSMUSG00000003824.12	Syce2	-1.98688	0.854673
ENSMUSG00000042029.7	Ncapg2	-1.42892	0.85464
ENSMUSG00000045328.11	Cenpe	-1.87732	0.854462
ENSMUSG00000022091.6	Sorbs3	2.01644	0.854081
ENSMUSG00000020377.15	Ltc4s	1.42706	0.853985
ENSMUSG00000022221.14	Ripk3	-1.36851	0.853651
ENSMUSG00000055782.9	Abcd2	2.41184	0.853598
ENSMUSG00000029910.14	Mad2l1	-1.53003	0.853341
ENSMUSG00000024097.10	Srsf7	-1.36257	0.853232
ENSMUSG00000025758.10	Plk4	-1.67659	0.853223
ENSMUSG00000005481.18	Ddx39	-1.3417	0.853161
ENSMUSG00000028896.13	Rcc1	-1.33294	0.85313
ENSMUSG00000026434.12	Nucks1	-1.40076	0.853046
ENSMUSG00000033446.7	Lpar6	1.66055	0.853043
ENSMUSG00000001707.8	Eef1e1	-1.64865	0.852934
ENSMUSG00000029610.13	Aimp2	-1.49277	0.852871
ENSMUSG00000048087.6	Gm4737	-1.62832	0.85286
ENSMUSG00000044197.8	Gpr146	1.42986	0.852505
ENSMUSG00000063286.7	Gm8995	-1.36189	0.851445
ENSMUSG00000038520.15	Tbc1d17	1.38493	0.851322
ENSMUSG00000022108.8	Itm2b	1.29589	0.851098
ENSMUSG00000004085.14	Map3k20	-1.44187	0.851021
ENSMUSG00000062070.12	Pgk1	-1.30385	0.850972
ENSMUSG00000026547.15	Tagln2	-1.28914	0.850962
ENSMUSG00000031146.6	Plp2	-1.2981	0.850959
ENSMUSG00000029060.17	Mib2	1.329	0.850945
ENSMUSG00000063229.15	Ldha	-1.28034	0.850836
ENSMUSG00000078812.10	Eif5a	-1.27898	0.850761
ENSMUSG00000059791.14	Nrm	-1.3721	0.85041
ENSMUSG00000041959.14	S100a10	-1.26309	0.850246
ENSMUSG00000037242.8	Clic4	-1.27876	0.850231
ENSMUSG00000030214.7	Plbd1	2.9317	0.850162
ENSMUSG00000019992.8	Mtfr2	-1.99341	0.849953
ENSMUSG00000002250.16	Ppard	1.45488	0.849944
ENSMUSG00000026558.13	Uck2	-1.44055	0.849921
ENSMUSG00000027602.9	Map1lc3a	1.53911	0.849751
ENSMUSG00000046434.16	Hnrnpa1	-1.25886	0.84972
ENSMUSG00000001440.5	Kpnb1	-1.28414	0.849664
ENSMUSG00000073700.3	Klhl21	1.7336	0.84957
ENSMUSG00000038482.11	Tfdp1	-1.28723	0.849498
ENSMUSG00000029098.17	Acox3	1.28972	0.849469
ENSMUSG00000020432.12	Tcn2	1.26765	0.849454
ENSMUSG00000056069.10	Otulinl	1.26148	0.849448
ENSMUSG00000002944.15	Cd36	-1.26041	0.849395
ENSMUSG00000025509.15	Pnpla2	1.31108	0.849203
ENSMUSG00000062510.12	Nsl1	-1.85231	0.849069
ENSMUSG00000075705.12	Msrb1	1.24636	0.848882
ENSMUSG00000053835.17	H2-T24	-1.25892	0.848882
ENSMUSG00000037266.18	Rsrp1	1.2416	0.84869
ENSMUSG00000029580.14	Actb	-1.22982	0.848653
ENSMUSG00000029304.14	Spp1	-1.2327	0.848653
ENSMUSG00000032294.17	Pkm	-1.22334	0.848644
ENSMUSG00000057666.18	Gapdh	-1.2165	0.848637
ENSMUSG00000054717.7	Hmgb2	-1.29778	0.84863
ENSMUSG00000032231.14	Anxa2	-1.22188	0.848617
ENSMUSG00000032577.16	Mapkapk3	1.34419	0.848591
ENSMUSG00000057762.6	Gm6169	-1.40371	0.848551
ENSMUSG00000023456.15	Tpi1	-1.22626	0.848547
ENSMUSG00000020101.14	Vsir	1.24469	0.848451
ENSMUSG00000038178.16	Slc43a2	1.21974	0.848392
ENSMUSG00000039852.17	Rere	1.27693	0.848318
ENSMUSG00000054766.13	Set	-1.23723	0.84816
ENSMUSG00000071713.6	Csf2rb	1.23393	0.848083
ENSMUSG00000034023.16	Fancd2	-2.1401	0.84803
ENSMUSG00000041685.16	Fcho2	1.26998	0.847986
ENSMUSG00000028645.11	Slc2a1	-1.28302	0.847753
ENSMUSG00000026202.13	Tuba4a	-1.23876	0.847672
ENSMUSG00000031403.14	Dkc1	-1.4089	0.847643
ENSMUSG00000072235.6	Tuba1a	-1.30393	0.847613
ENSMUSG00000071172.13	Srsf3	-1.22398	0.847523
ENSMUSG00000056234.15	Ncoa4	1.22148	0.847483
ENSMUSG00000004609.11	Cd33	1.23233	0.847085
ENSMUSG00000004099.16	Dnmt1	-1.24503	0.846963
ENSMUSG00000022360.8	Atad2	-1.30166	0.846431
ENSMUSG00000037419.9	Endod1	-1.25087	0.8461
ENSMUSG00000038759.15	Nup205	-1.32731	0.846046
ENSMUSG00000038332.13	Sesn1	1.25915	0.846029
ENSMUSG00000083669.5	Gm10169	-1.73964	0.84601
ENSMUSG00000031756.5	Cenpn	-1.74894	0.84601
ENSMUSG00000021575.16	Ahrr	1.4435	0.845938
ENSMUSG00000026656.15	Fcgr2b	1.21686	0.845539
ENSMUSG00000024742.15	Fen1	-1.25901	0.845408
ENSMUSG00000003955.8	Fam162a	-1.28923	0.845332
ENSMUSG00000079057.4	Cyp4v3	1.35273	0.845118
ENSMUSG00000075232.5	Amd1	-1.25648	0.844911
ENSMUSG00000010048.10	Ifrd2	-1.72545	0.84487
ENSMUSG00000037224.15	Zfyve28	1.97675	0.844419
ENSMUSG00000028613.14	Lrp8	-1.88244	0.844219
ENSMUSG00000035713.15	Usp35	1.89274	0.844219
ENSMUSG00000008450.8	Nutf2	-1.22059	0.84418
ENSMUSG00000024773.14	Atg2a	1.43145	0.844106
ENSMUSG00000027955.16	Fam198b	-1.65034	0.84406
ENSMUSG00000003038.15	Hmgn2	-1.31141	0.843793
ENSMUSG00000024079.4	Eif2ak2	-1.2476	0.843409
ENSMUSG00000063524.13	Eno1	-1.21092	0.84339
ENSMUSG00000061232.15	H2-K1	1.19883	0.843323
ENSMUSG00000079523.8	Tmsb10	-1.19824	0.843183
ENSMUSG00000029254.16	Stap1	-1.24681	0.843129
ENSMUSG00000083773.4	Gm13394	-1.18583	0.842952
ENSMUSG00000028693.15	Nasp	-1.25408	0.842854
ENSMUSG00000086841.1	2410006H16Rik	1.24289	0.842806
ENSMUSG00000036622.15	Atp13a2	1.18572	0.842693
ENSMUSG00000023827.8	Agpat4	-1.26411	0.842595
ENSMUSG00000064193.8	Gm4735	-1.21231	0.842367
ENSMUSG00000027540.13	Ptpn1	1.2019	0.842324
ENSMUSG00000004207.14	Psap	1.17005	0.842312
ENSMUSG00000052833.9	Sae1	-1.1872	0.842236
ENSMUSG00000040746.15	Rnf167	1.24897	0.842182
ENSMUSG00000019960.8	Dusp6	-1.30434	0.842005
ENSMUSG00000031903.7	Pla2g15	1.1909	0.841975
ENSMUSG00000020184.15	Mdm2	-1.18067	0.841973
ENSMUSG00000020423.6	Btg2	1.48292	0.84172
ENSMUSG00000056091.12	St3gal5	-1.17956	0.841581
ENSMUSG00000015776.12	Med22	1.16539	0.841544
ENSMUSG00000064267.13	Hvcn1	1.18314	0.841544
ENSMUSG00000031812.16	Map1lc3b	1.1744	0.841519
ENSMUSG00000024772.9	Ehd1	-1.17134	0.841471
ENSMUSG00000037458.15	Azin1	-1.16702	0.841379
ENSMUSG00000032575.16	Manf	-1.17454	0.841191
ENSMUSG00000056612.6	Ppp1r14b	-1.19532	0.841147
ENSMUSG00000051212.8	Gpr183	-1.35436	0.841138
ENSMUSG00000037111.9	Setd7	1.30347	0.84095
ENSMUSG00000001576.14	Ergic1	-1.19067	0.840629
ENSMUSG00000031262.12	Cenpi	-1.75733	0.840492
ENSMUSG00000091705.8	H2-Q2	1.5695	0.840469
ENSMUSG00000032265.14	Tent5a	1.54548	0.840469
ENSMUSG00000029223.12	Uchl1	-2.10709	0.840382
ENSMUSG00000039656.16	Rxrb	1.21756	0.840053
ENSMUSG00000049625.6	Tifab	1.20461	0.839579
ENSMUSG00000027490.17	E2f1	-1.26094	0.839526
ENSMUSG00000032555.10	Topbp1	-1.1845	0.839393
ENSMUSG00000039231.18	Suv39h1	-1.32394	0.839368
ENSMUSG00000006732.14	Mettl1	-1.72888	0.839353
ENSMUSG00000002718.14	Cse1l	-1.18721	0.839073
ENSMUSG00000035824.7	Tk2	1.26555	0.838896
ENSMUSG00000020290.14	Xpo1	-1.18121	0.838875
ENSMUSG00000022817.15	Itgb5	1.1566	0.838725
ENSMUSG00000073411.11	H2-D1	1.13713	0.838644
ENSMUSG00000036781.13	Rps27l	-1.16486	0.838612
ENSMUSG00000062825.15	Actg1	-1.14166	0.838611
ENSMUSG00000000686.11	Abhd15	1.63047	0.838503
ENSMUSG00000059040.4	Eno1b	-1.16224	0.838414
ENSMUSG00000034659.14	Tmem109	-1.13821	0.8382
ENSMUSG00000022106.14	Rcbtb2	1.14685	0.838121
ENSMUSG00000001056.3	Nhp2	-1.20692	0.838022
ENSMUSG00000029591.14	Ung	-2.46729	0.837763
ENSMUSG00000015396.4	Cd83	1.49834	0.837605
ENSMUSG00000026554.15	Dcaf8	1.1798	0.837344
ENSMUSG00000028121.8	Bcar3	-1.21725	0.837171
ENSMUSG00000031373.4	Car5b	-1.41365	0.837102
ENSMUSG00000045273.8	Cenph	-1.80579	0.837094
ENSMUSG00000027995.10	Tlr2	1.14154	0.836908
ENSMUSG00000109324.2	Prmt1	-1.14556	0.836781
ENSMUSG00000038068.15	Rnf144b	1.2725	0.836382
ENSMUSG00000042901.10	Aida	-1.1645	0.836315
ENSMUSG00000030265.14	Kras	-1.19253	0.836261
ENSMUSG00000028211.11	Trp53inp1	1.36289	0.836012
ENSMUSG00000032020.15	Ubash3b	-1.29072	0.835923
ENSMUSG00000001123.15	Lgals9	-1.11978	0.835879
ENSMUSG00000014470.4	Rnf166	1.16444	0.835757
ENSMUSG00000058624.12	Gda	-1.13802	0.835539
ENSMUSG00000015846.14	Rxra	1.19324	0.835437
ENSMUSG00000034616.16	Ssh3	1.15161	0.835406
ENSMUSG00000034957.10	Cebpa	1.15492	0.835406
ENSMUSG00000002871.14	Tpra1	1.12652	0.835325
ENSMUSG00000031353.13	Rbbp7	-1.11762	0.835321
ENSMUSG00000049932.3	H2afx	-1.2501	0.835102
ENSMUSG00000024844.14	Banf1	-1.12492	0.835071
ENSMUSG00000006127.9	Inpp5k	1.19188	0.835012
ENSMUSG00000007613.15	Tgfbr1	1.1268	0.834903
ENSMUSG00000035004.3	Igsf6	1.12779	0.834903
ENSMUSG00000101188.1	Eif4a-ps4	-1.11876	0.834848
ENSMUSG00000005142.10	Man2b1	1.11095	0.834808
ENSMUSG00000025134.2	Alyref	-1.29516	0.834789
ENSMUSG00000024791.10	Cdca5	-1.54186	0.834781
ENSMUSG00000025804.5	Ccr1	-1.53085	0.834764
ENSMUSG00000028551.14	Cdkn2c	-1.20195	0.834759
ENSMUSG00000017754.13	Pltp	1.10028	0.834641
ENSMUSG00000006445.3	Epha2	-4.61335	0.83455
ENSMUSG00000006715.11	Gmnn	-1.11767	0.83452
ENSMUSG00000030835.6	Nomo1	-1.20131	0.834259
ENSMUSG00000039910.10	Cited2	1.14182	0.83418
ENSMUSG00000026437.11	Cdk18	-1.10723	0.834027
ENSMUSG00000034317.14	Trim59	-1.26279	0.834023
ENSMUSG00000059195.10	Gm12715	-1.15677	0.833968
ENSMUSG00000019726.12	Lyst	1.17731	0.833907
ENSMUSG00000029177.9	Cenpa	-1.13188	0.833743
ENSMUSG00000001435.15	Col18a1	-1.10477	0.833583
ENSMUSG00000036992.10	Nxt1	-1.22252	0.833563
ENSMUSG00000056153.14	Socs6	1.157	0.833441
ENSMUSG00000020009.13	Ifngr1	1.10457	0.833285
ENSMUSG00000007659.18	Bcl2l1	-1.09271	0.833062
ENSMUSG00000028926.15	Cdk14	-1.10468	0.833046
ENSMUSG00000025492.6	Ifitm3	-1.0807	0.833029
ENSMUSG00000020696.18	Rffl	2.23096	0.832978
ENSMUSG00000004642.13	Slbp	-1.12043	0.832932
ENSMUSG00000028063.15	Lmna	-1.0833	0.832834
ENSMUSG00000046865.7	Fbl	-1.10337	0.832703
ENSMUSG00000054342.8	Kcnn4	-1.07656	0.832598
ENSMUSG00000096472.2	Cdkn2d	-1.12719	0.832544
ENSMUSG00000031451.6	Gas6	1.07689	0.832501
ENSMUSG00000032690.16	Oas2	-1.11624	0.832492
ENSMUSG00000027752.15	Exosc8	-1.19034	0.83237
ENSMUSG00000038175.10	Mylip	1.66405	0.832344
ENSMUSG00000020869.8	Lrrc59	-1.07749	0.832274
ENSMUSG00000028333.10	Anp32b	-1.08386	0.83225
ENSMUSG00000002910.11	Arrdc2	1.65122	0.832236
ENSMUSG00000030187.15	Klra2	-1.62812	0.832198
ENSMUSG00000027215.13	Cd82	1.1029	0.832107
ENSMUSG00000068220.6	Lgals1	-1.05798	0.832098
ENSMUSG00000006932.17	Ctnnb1	1.0611	0.832066
ENSMUSG00000059796.16	Eif4a1	-1.05945	0.832028
ENSMUSG00000020841.5	Cpd	-1.08591	0.832024
ENSMUSG00000025364.13	Pa2g4	-1.12021	0.831952
ENSMUSG00000045763.8	Basp1	-1.05653	0.831776
ENSMUSG00000021037.7	Ahsa1	-1.07308	0.831703
ENSMUSG00000051043.16	Gprc5c	3.1257	0.831607
ENSMUSG00000018427.7	Ypel2	3.024	0.831607
ENSMUSG00000027326.13	Knl1	-2.03983	0.831594
ENSMUSG00000036766.12	Dner	-2.05267	0.831594
ENSMUSG00000090086.7	AI480526	1.25195	0.831497
ENSMUSG00000021624.9	Cd180	-1.05361	0.831374
ENSMUSG00000024187.14	Fam234a	1.07044	0.831365
ENSMUSG00000032024.10	Clmp	1.54253	0.831301
ENSMUSG00000021384.14	Susd3	1.06711	0.831039
ENSMUSG00000104913.1	Gm6560	-1.18459	0.831028
ENSMUSG00000030530.15	Furin	1.06516	0.831013
ENSMUSG00000076437.10	Selenoh	-1.11615	0.830999
ENSMUSG00000025232.8	Hexa	1.03249	0.830997
ENSMUSG00000015854.7	Cd5l	-2.84173	0.830966
ENSMUSG00000086782.2	E130102H24Rik	2.81825	0.830966
ENSMUSG00000051439.6	Cd14	-1.01626	0.830937
ENSMUSG00000052331.14	Ankrd44	1.19135	0.830896
ENSMUSG00000015176.10	Nolc1	-1.18875	0.830896
ENSMUSG00000028064.17	Sema4a	1.19446	0.830896
ENSMUSG00000020053.18	Igf1	0.997302	0.830837
ENSMUSG00000039959.13	Hip1	-1.07098	0.83081
ENSMUSG00000059005.13	Hnrnpa3	-1.03451	0.83073
ENSMUSG00000035365.15	Parpbp	-1.951	0.830661
ENSMUSG00000050390.12	C77080	1.0741	0.830654
ENSMUSG00000032232.14	Cgnl1	-1.34075	0.830607
ENSMUSG00000079225.3	Gm9531	-1.32307	0.830591
ENSMUSG00000021703.9	Serinc5	1.90019	0.83047
ENSMUSG00000058799.16	Nap1l1	-1.0185	0.830413
ENSMUSG00000068747.14	Sort1	1.29004	0.830351
ENSMUSG00000033159.14	Cnppd1	1.07641	0.83032
ENSMUSG00000022389.15	Tef	1.06714	0.830237
ENSMUSG00000042613.9	Pbxip1	1.02374	0.830098
ENSMUSG00000046897.17	Zfp740	1.13431	0.83008
ENSMUSG00000025980.14	Hspd1	-1.01451	0.830029
ENSMUSG00000047139.9	Cd24a	-0.999949	0.829949
ENSMUSG00000027195.10	Hsd17b12	-1.02318	0.829921
ENSMUSG00000004952.13	Rasa4	1.02688	0.829883
ENSMUSG00000029762.6	Akr1b8	-1.06841	0.829763
ENSMUSG00000040997.13	Abhd4	1.01538	0.829737
ENSMUSG00000039382.12	Wdr45	1.84123	0.829725
ENSMUSG00000021003.10	Galc	1.07599	0.829558
ENSMUSG00000040848.11	Sft2d2	1.0451	0.829498
ENSMUSG00000032633.12	Flcn	1.09955	0.829413
ENSMUSG00000037822.12	Smim14	1.13418	0.829334
ENSMUSG00000062867.13	Impdh2	-1.04282	0.829222
ENSMUSG00000085208.3	Brip1os	-1.08634	0.829189
ENSMUSG00000071714.7	Csf2rb2	1.03188	0.829181
ENSMUSG00000039621.13	Prex1	1.01373	0.829169
ENSMUSG00000003438.17	Timm50	-1.06856	0.82912
ENSMUSG00000027597.15	Ahcy	-1.40046	0.829114
ENSMUSG00000079227.10	Ccr5	-1.04453	0.828819
ENSMUSG00000037725.8	Ckap2	-1.42394	0.828749
ENSMUSG00000063787.4	Chchd1	-1.06857	0.828561
ENSMUSG00000041879.13	Ipo9	-1.0854	0.828438
ENSMUSG00000074785.5	Plxnc1	1.0522	0.828384
ENSMUSG00000085295.7	4930430E12Rik	-1.06372	0.828327
ENSMUSG00000052934.14	Fbxo31	1.37141	0.82805
ENSMUSG00000096544.2	Gm4617	-1.13071	0.828048
ENSMUSG00000029082.17	Bst1	-1.03778	0.828046
ENSMUSG00000025203.5	Scd2	-1.35668	0.828034
ENSMUSG00000025403.5	Shmt2	-1.08169	0.827889
ENSMUSG00000003849.8	Nqo1	-1.25662	0.827842
ENSMUSG00000051343.11	Rab11fip5	1.06917	0.827819
ENSMUSG00000041801.5	Phlda3	-1.35129	0.827722
ENSMUSG00000073412.6	Lst1	1.09475	0.827619
ENSMUSG00000077704.1	Snord89	2.55889	0.827399
ENSMUSG00000022124.15	Fbxl3	1.07074	0.827332
ENSMUSG00000024966.8	Stip1	-1.04999	0.827326
ENSMUSG00000032113.16	Chek1	-2.43866	0.827103
ENSMUSG00000039748.11	Exo1	-2.44191	0.827103
ENSMUSG00000053411.16	Cbx7	1.50197	0.826927
ENSMUSG00000031848.15	Lsm4	-1.01933	0.826717
ENSMUSG00000059851.15	Kmt5c	1.00708	0.826334
ENSMUSG00000063480.8	Snu13	-1.03705	0.826133
ENSMUSG00000030254.16	Rad18	-1.45979	0.826054
ENSMUSG00000040710.10	St8sia4	1.15346	0.825959
ENSMUSG00000026192.13	Atic	-1.08405	0.825737
ENSMUSG00000022433.19	Csnk1e	1.05153	0.825665
ENSMUSG00000023953.9	Polh	-1.41009	0.825649
ENSMUSG00000049624.14	Slc17a5	1.02801	0.825397
ENSMUSG00000024164.15	C3	1.1011	0.825255
ENSMUSG00000060950.12	Trmt61a	-1.68606	0.825179
ENSMUSG00000027276.7	Jag1	-1.69486	0.825179
ENSMUSG00000059108.4	Ifitm6	-1.04411	0.825053
ENSMUSG00000004446.12	Bid	-1.11744	0.824949
ENSMUSG00000036678.8	Aaas	-1.0752	0.824886
ENSMUSG00000018339.11	Gpx3	1.37477	0.824593
ENSMUSG00000020018.6	Snrpf	-1.19376	0.824119
ENSMUSG00000035704.17	Alg8	-1.33063	0.82411
ENSMUSG00000032477.14	Cdc25a	-1.33315	0.82411
ENSMUSG00000038732.15	Mboat1	-1.27585	0.824045
ENSMUSG00000024143.14	Rhoq	1.04167	0.823984
ENSMUSG00000020399.14	Havcr2	-1.0172	0.823713
ENSMUSG00000050022.16	Amz1	1.00567	0.823699
ENSMUSG00000020116.7	Pno1	-0.995281	0.823699
ENSMUSG00000030605.15	Mfge8	1.01202	0.823699
ENSMUSG00000001016.12	Ilf2	-1.14367	0.823577
ENSMUSG00000006611.15	Hfe	1.13313	0.823572
ENSMUSG00000070327.14	Rnf213	-1.17637	0.823453
ENSMUSG00000071637.5	Cebpd	1.17149	0.823276
ENSMUSG00000026483.13	Fam129a	1.01236	0.822847
ENSMUSG00000105769.1	Gm43351	-1.21088	0.822798
ENSMUSG00000026784.14	Pdss1	-2.30332	0.822614
ENSMUSG00000021707.5	Dhfr	-2.21308	0.822474
ENSMUSG00000024795.11	Kif20b	-1.53376	0.822449
ENSMUSG00000026429.9	Ube2t	-1.5588	0.822449
ENSMUSG00000027883.15	Gpsm2	-1.49175	0.821993
ENSMUSG00000025584.17	Pde8a	-1.03104	0.821992
ENSMUSG00000076137.1	Gm26384	-1.88073	0.82177
ENSMUSG00000026779.6	Mastl	-1.89839	0.82177
ENSMUSG00000020064.9	Herc4	1.06699	0.821691
ENSMUSG00000028587.18	Orc1	-2.15703	0.821591
ENSMUSG00000034773.16	BC030867	-2.13185	0.821591
ENSMUSG00000046186.8	Cd109	-1.14705	0.821459
ENSMUSG00000031274.16	Col4a5	-1.27638	0.821437
ENSMUSG00000082016.3	Pgam1-ps2	-1.01277	0.821433
ENSMUSG00000051235.10	Gen1	-2.00667	0.821283
ENSMUSG00000039187.16	Fanci	-2.05779	0.821283
ENSMUSG00000072980.3	Oip5	-1.85373	0.821107
ENSMUSG00000032344.17	Mb21d1	-1.81434	0.821025
ENSMUSG00000022419.16	Deptor	1.82746	0.821025
ENSMUSG00000046027.17	Stard5	1.08492	0.82078
ENSMUSG00000029836.15	Cbx3	-1.02184	0.820226
ENSMUSG00000031256.11	Cstf2	-1.4362	0.820202
ENSMUSG00000042333.16	Tnfrsf14	1.10959	0.819882
ENSMUSG00000087679.2	Tmem250-ps	1.11013	0.819882
ENSMUSG00000006494.11	Pdk1	-1.2353	0.819369
ENSMUSG00000073096.11	Lrrc61	1.23882	0.819369
ENSMUSG00000021709.14	Erbin	1.05278	0.819366
ENSMUSG00000034437.8	Gm9761	-1.78303	0.818249
ENSMUSG00000019947.10	Arid5b	1.75445	0.818132
ENSMUSG00000032783.9	Troap	-1.73744	0.818132
ENSMUSG00000059439.15	Bcas3	1.26772	0.817941
ENSMUSG00000062248.5	Cks2	-1.08504	0.817583
ENSMUSG00000019303.14	Psmc3ip	-2.65834	0.817399
ENSMUSG00000024613.16	Tcof1	-1.00758	0.817054
ENSMUSG00000019823.17	Mical1	1.05055	0.816577
ENSMUSG00000067203.7	H2-K2	1.23567	0.816366
ENSMUSG00000027514.14	Zbp1	-1.67212	0.816335
ENSMUSG00000030609.18	Aen	-1.23246	0.816258
ENSMUSG00000026821.15	Ralgds	1.22092	0.816258
ENSMUSG00000030126.17	Tmcc1	1.21772	0.816258
ENSMUSG00000004933.17	Matk	1.63376	0.816226
ENSMUSG00000074212.7	Dnajb14	1.13806	0.816209
ENSMUSG00000038279.10	Nop2	-1.12905	0.816036
ENSMUSG00000038685.18	Rtel1	-1.31678	0.815341
ENSMUSG00000060012.9	Kif13b	1.06936	0.814943
ENSMUSG00000042462.4	Dctpp1	-1.09155	0.814844
ENSMUSG00000041935.10	AW549877	1.02121	0.81476
ENSMUSG00000054702.14	Ap1s3	-1.43877	0.814746
ENSMUSG00000026675.12	Hsd17b7	-1.42213	0.81448
ENSMUSG00000032280.16	Tle3	1.04636	0.814085
ENSMUSG00000044456.16	Rin3	1.0587	0.813095
ENSMUSG00000021579.4	Lrrc14b	3.83933	0.813088
ENSMUSG00000022504.10	Ciita	3.7941	0.813088
ENSMUSG00000051329.13	Nup160	-1.21738	0.812821
ENSMUSG00000039735.15	Fnbp1l	-1.05082	0.812623
ENSMUSG00000038437.11	Mllt6	1.11446	0.812529
ENSMUSG00000048965.9	Mrgpre	1.97102	0.81165
ENSMUSG00000023940.14	Sgo1	-1.98666	0.81165
ENSMUSG00000041406.14	BC055324	-1.88271	0.811496
ENSMUSG00000031129.9	Slc9a9	1.38766	0.811393
ENSMUSG00000027242.14	Wdr76	-1.39369	0.811393
ENSMUSG00000073678.4	Pgap1	1.39306	0.811393
ENSMUSG00000053801.18	Grwd1	-1.37581	0.811273
ENSMUSG00000038335.13	Tsr1	-1.21415	0.811064
ENSMUSG00000039356.15	Exosc2	-1.04548	0.811055
ENSMUSG00000058318.15	Phf21a	1.27727	0.810848
ENSMUSG00000020547.5	Bzw2	-1.1861	0.810822
ENSMUSG00000002409.18	Dyrk1b	1.83399	0.81075
ENSMUSG00000026974.11	Zmynd19	-1.53281	0.81066
ENSMUSG00000043953.12	Ccrl2	1.50729	0.810607
ENSMUSG00000057229.11	Dmac2	1.10894	0.810548
ENSMUSG00000047547.14	Cltb	-1.03339	0.810518
ENSMUSG00000042628.8	Zfyve1	1.0126	0.810473
ENSMUSG00000015243.4	Abca1	2.22302	0.810336
ENSMUSG00000027863.8	Cd2	2.18419	0.810196
ENSMUSG00000031432.3	Prps1	-1.325	0.809911
ENSMUSG00000064109.8	Hcst	1.15929	0.809811
ENSMUSG00000027968.11	Larp7	-1.06128	0.809702
ENSMUSG00000026134.11	Prim2	-1.14366	0.80934
ENSMUSG00000003031.14	Cdkn1b	1.05072	0.809246
ENSMUSG00000034858.16	Fam214a	2.00239	0.809064
ENSMUSG00000051220.2	Ercc6l	-1.99776	0.809064
ENSMUSG00000021830.14	Txndc16	1.24175	0.808827
ENSMUSG00000047264.8	Zfp358	1.21512	0.80872
ENSMUSG00000067714.13	Lpar5	1.01118	0.808669
ENSMUSG00000056209.7	Npm3	-1.1079	0.808263
ENSMUSG00000085213.1	Gm13091	1.74332	0.807858
ENSMUSG00000021175.15	Cdca7l	-1.05995	0.807733
ENSMUSG00000022505.9	Emp2	-1.21075	0.807627
ENSMUSG00000025474.9	Tubgcp2	-1.1297	0.807365
ENSMUSG00000073131.12	Vma21	-1.08546	0.807202
ENSMUSG00000037278.9	Tmem97	-1.01006	0.806715
ENSMUSG00000022960.13	Donson	-1.68118	0.806312
ENSMUSG00000030528.12	Blm	-1.59376	0.806023
ENSMUSG00000014361.5	Mertk	1.62121	0.806023
ENSMUSG00000030748.9	Il4ra	1.10046	0.80557
ENSMUSG00000002297.16	Dbf4	-1.03909	0.804689
ENSMUSG00000054293.10	P2ry10b	-1.08685	0.804625
ENSMUSG00000060152.14	Pop5	-1.09193	0.804625
ENSMUSG00000002983.17	Relb	1.25397	0.804517
ENSMUSG00000018931.3	Natd1	1.02417	0.804462
ENSMUSG00000002274.12	Metrn	-1.22432	0.80413
ENSMUSG00000063445.14	Nmral1	-1.23121	0.80413
ENSMUSG00000056185.4	Snx32	1.20931	0.803554
ENSMUSG00000054723.6	Vmac	1.53701	0.80335
ENSMUSG00000001288.15	Rarg	1.15316	0.803333
ENSMUSG00000027811.9	4930579G24Rik	-1.51014	0.803297
ENSMUSG00000062822.8	4833420G17Rik	1.07352	0.803266
ENSMUSG00000039377.7	Hlx	1.13921	0.802964
ENSMUSG00000032478.14	Nme6	-1.1044	0.80261
ENSMUSG00000091625.8	Lsm5	-1.17446	0.802504
ENSMUSG00000054676.15	1600014C10Rik	1.03515	0.802127
ENSMUSG00000054150.12	Syne3	-0.99898	0.801908
ENSMUSG00000052033.13	Pfdn4	-1.00229	0.801908
ENSMUSG00000018986.10	Slfn3	-1.43909	0.801199
ENSMUSG00000039470.15	Zdhhc2	-1.432	0.800976
ENSMUSG00000001741.12	Il16	2.4575	0.800162

## Sheet: Table S8A
Table S8A Predicted possible regorafenib-regulated transcription regulator by upstream regulator analysis from Ingenuity Pathway Analysis (IPA)
Upstream Regulator	Molecule Type	p-value of overlap	Target molecules in dataset
CREB1	transcription regulator	0.00144	ARG1,KLF4,MMP13
MYC	transcription regulator	0.00211	ARG1,CD44,IFI44,KLF4,RARS
KLF4	transcription regulator	0.00306	ARG1,CD44,KLF4
STAT1	transcription regulator	0.00701	ARG1,IFI44,KLF4
TAF4	transcription regulator	0.00916	KLF4,MMP13
IRF2	transcription regulator	0.0115	ARG1,KLF4
SOX2	transcription regulator	0.025	CD44,ETS2,KLF4
WT1	transcription regulator	0.0333	KLF4,Serpinb9b
TCF3	transcription regulator	0.0412	ENPP1,KLF4
TCF7L1	transcription regulator	0.0422	KLF4
ZBTB7B	transcription regulator	0.0436	KLF4

## Sheet: Table S8B
Table S8B Predicted possible CREB binding site on KLF4 promoter region (0 to -2K) by online database (JASPAR)
Matrix ID	Name	Score	Relative score	Sequence ID	Start	End	Strand	Predicted sequence
MA0018.2	CREB1	10.3633	0.955862	seq_14108	2711	2718	-	TGACGCCA
MA0018.2	CREB1	8.09221	0.872691	seq_14108	2674	2681	-	TGACGCCG
MA0018.2	CREB1	7.79764	0.861903	seq_14108	1084	1091	+	TGACACCA
MA0018.2	CREB1	7.734	0.859572	seq_14108	2711	2718	+	TGGCGTCA
MA0018.2	CREB1	7.5344	0.852263	seq_14108	814	821	+	TGACATAA
MA0018.2	CREB1	7.34597	0.845362	seq_14108	1205	1212	+	CGAGGTCA
MA0018.2	CREB1	6.90521	0.829221	seq_14108	1210	1217	+	TCACGTGA
MA0018.2	CREB1	6.90521	0.829221	seq_14108	1210	1217	-	TCACGTGA
MA0018.2	CREB1	6.577	0.817201	seq_14108	378	385	+	GGACATCA
MA0018.2	CREB1	6.53272	0.81558	seq_14108	318	325	-	TGATGTAA

## Sheet: Table S8C
Table S8C mouse KLF4 promoter region
>seq_14108 2945 bp
ACCTACAGTCCCAGCACCTATGAGCTGTGGTGAGTTCAAGACCTGATTGTGCTATAAGTTCCAGACCAGACTGGGCAACAGTGGGGGACT
CTACACCAATTTAAAACAAATTAAAAGAACACCTTTTCTTGAATCCTATTGGCAACCATATACAGAAAACCCAGGAAAAGGAGCAGGTGC
CCAGATACTCCATGTGCCCTGACCTGTGCCCAGCTATGTGTGGAGTCCTGCACTGCAGATACTCATACAGTCTCCCCCACAGCTGGGCAG
TCATCCCACCCCACCCCACCCTTCCTCCCTAGCTCTGGCTACTGCCATTACATCATCTGCCAACTGCTGCAGTTTGTGCTGGAAAAAAAA
GTATTTTAAAACTCCAAGGACATCAATAATTAACTTCCATACCACAAAACTTGTAATATGAGTTTGCTGAAATAAAGTCACCAGTATTTA
ATTCTTCTTTAAAGGGTGTCTTCTATTATTATTATTTTAGAGTGCAATTTAGTCATCAAAGGTTTACACAGCCTCATGTTTATAAATTAT
ATGGGGCAGGGATTTAACTCTTCTGGCCCTACCTGTTCTGATGAGAGGGAGGGTCATAACCCTGTTGTCACACCCGGCACCTGCCTTGAA
AGGGATGAGTTGTGAGCTGGAACTTCATAGCTCTTTTAGAAATCTGGGATGAATATACAGATTTCCTCTTATGATGCAATCGCAAGAAGA
ACCCGTGTGTTGCCTGCTGGCTTTTATCCTCCAGAAGGCTGTTGGGAAACTTCATCTTTTTCAGTTGCGTTTCAGAATCTTGCCTTGATT
ATATGACATAATAATAGTGGCTCTCCAATTCATCTGTGAAATCTTTTTTCATTGTGGTGGTTACTGGTTAGATGGTCAAGAGGGGGGAGG
GACTACTGTCCTAGGTAAATAAAAACCACCGAGCTGAAAGAGTTTAGGGCCCTGACTGACTTTATGTGTTTACATCCTCATCTAAGTTCA
TCGAGGGTTTGAGACCTTGGCCTTAAAGTGGCTCACTTTACAAAGTAATGCTCAATCCTAGCTTTCCAAGCCAGAATTTTTTTCTTTCTT
TCTTGACACCACAATGGGGGCGAAGGGGTGGGAACAGGTGTTCTTTTTGTTGTTCCTTTGTTTGAACGAGTAATATTTTCAGAGTTAAAC
TGGCCTAGTTCCAAGGGAATGGGGATGAACCCCTCGAGGTCACGTGAAGGGGGAGCGCCACTTTCCAGGCGAAGTCGGGCTCTTCCCCAC
CCCTTAGCGCGCCTAGTCCTCTGCCAAAACCAAGAGAAAGGATGAAAAGTCCTTCCTCAAAGGCTCCCAGCTCGAGCCCTGCCTTTGACA
GACTGACTGGGCAGCCCCACTTCATTGGGAAGAGATGCATTCCAAGAGCGCTTCTGTGGTCGGCCAGAAGTGGAAAATTCAGGATGACAA
ATATTCCGAAGAAAACTAATATAGGTCCCAAGGATTCCGGGACTCAAACAGGTGAAACGACAGAGGACGTGGCACCGACGCCCCGAGAGG
AGCGAGTGCACACGCTGCCTATGCTGGAGCATCGACCCCCTTTCCCGAGTGCCTTTCTTCAGTCCCCGCCCTCAGCTGTCTCCGCCAGGG
TTCAACCATGAGGGCGGCGGAGCCCAACTCTGCTCCCCAATCCAAAATAAACACCTAGCCTTAAAAAAAAAAAAAAAGTAAACCTAGTTT
AGCGAGTTATACTGAACACCACACTCACGGTTTTTGTTTTGTTTTAAGTACTTGGTAGAGATGAGGGCGAAAACCTTTCCCGGCTGGAAA
ATTACTGAGGGTAGTGGGGAATGGGAAAAGGAGTAATAAGACTAAAACAAAGACTGCCTTTTCCCCTCCCGGTAGGCAAGGGCCTGAGGT
GCCACTTTGGAGCACTAGGGTCCCATTGCAGCGCTCCTCTTCCCAGCGCAGGATCACCTCCCAGTGAAGTCCCTTTGAGTGGGTTGGCTA
GCTCAGAACCTAAGTTGATGGGAGCGAGTTGTCCTATGACCTTTACCTCGCCGCTTCACCTCTTTATGACTCACTTCTCATCTTCAAAAT
GAAGAGTGCGAGTGCGTAGCTTGTAAAGAGCTTTGAGATCCCTGGTGAAAGGTATCTCCGCGCCTCGGTCCCTCTCCGCGTTCCCACTCC
CCCACCCCCAATGTAAATCTGGAACGCCTTCCTTGTTCCTTCCATTATCAAGATGACTACGTGCCCAATCCCGGCCGCTCTCTTTCATAG
CAGGCGCGGAACCCCTTCTCCTAGCTTCTGAGATTCCTAGCGCCCCCCCCCAATCACCCGGCCCTCACCCCCACCCTACGGGAGGCCCCA
CTGGCACCCGCGCCAGGCCAGGCCCTGCGCCGACACGGCCCGGCGTCTGCGTGCGTATGCGAGAGAGGGCGGGCTGGATGAGTCACGCGG
ATAATCGCGCTCTCGAGTGCGCAGACGACAGGACAAGCGCGTACGCGAGCAGGGGTAGGGGCGCGCCGCCTCTTCCCCCCCACACACACA
CACCCCCAACCTCCTGTCCCCCGCCAGGGTTCCCGTGGCAGGACTTTCGAGCCCAGGGAACCGACCGTGGCCGCCCAGAGGACCCCGAGT
AGCGCGGCCACGGGAGCCACGCCGTACTCCCAGCGCCGGAGCCGCCGTCGCCGCCACCGCCGCCGGCGTCAGCACGGCTCCAGCCCGCCA
GCTGCCTGGCTGGCGTCACGGCCTGGCCCCGCCCCGCCCGCGCCCCTCCCTCGCCCCCGCCCCCACGTGCGCGGAGTTTGTTTATTTAGC
TACCATGGCAACGCGCAGTGGGGGCTGCGGGAAGGCGGGGAGAAGAAAGGCAGGGGGCGGGGCCTGGCGGCGGAGCCCCGCGCGCCGCCA
CAGGGAGGAGGCGGGGAGCAAGCGAGCGAGAAGTTATAAGTAAGAAGCGCGCGGCGGCCGCCGGC

[truncated: 2 more sheets: Table S9, Table S10]
